# Supplementary material for: Estimating the Contribution of Proteasomal Spliced Peptides to the HLA-I Ligandome*
Source: PubMed Central journal article supplement (PMC6283289; doi:10.1074/mcp.ra118.000877), 2018-09-05
Supplement: 138326_2_supp_192527_pd4q2d.pdf [file 138326_2_supp_192527_pd4q2d.pdf]

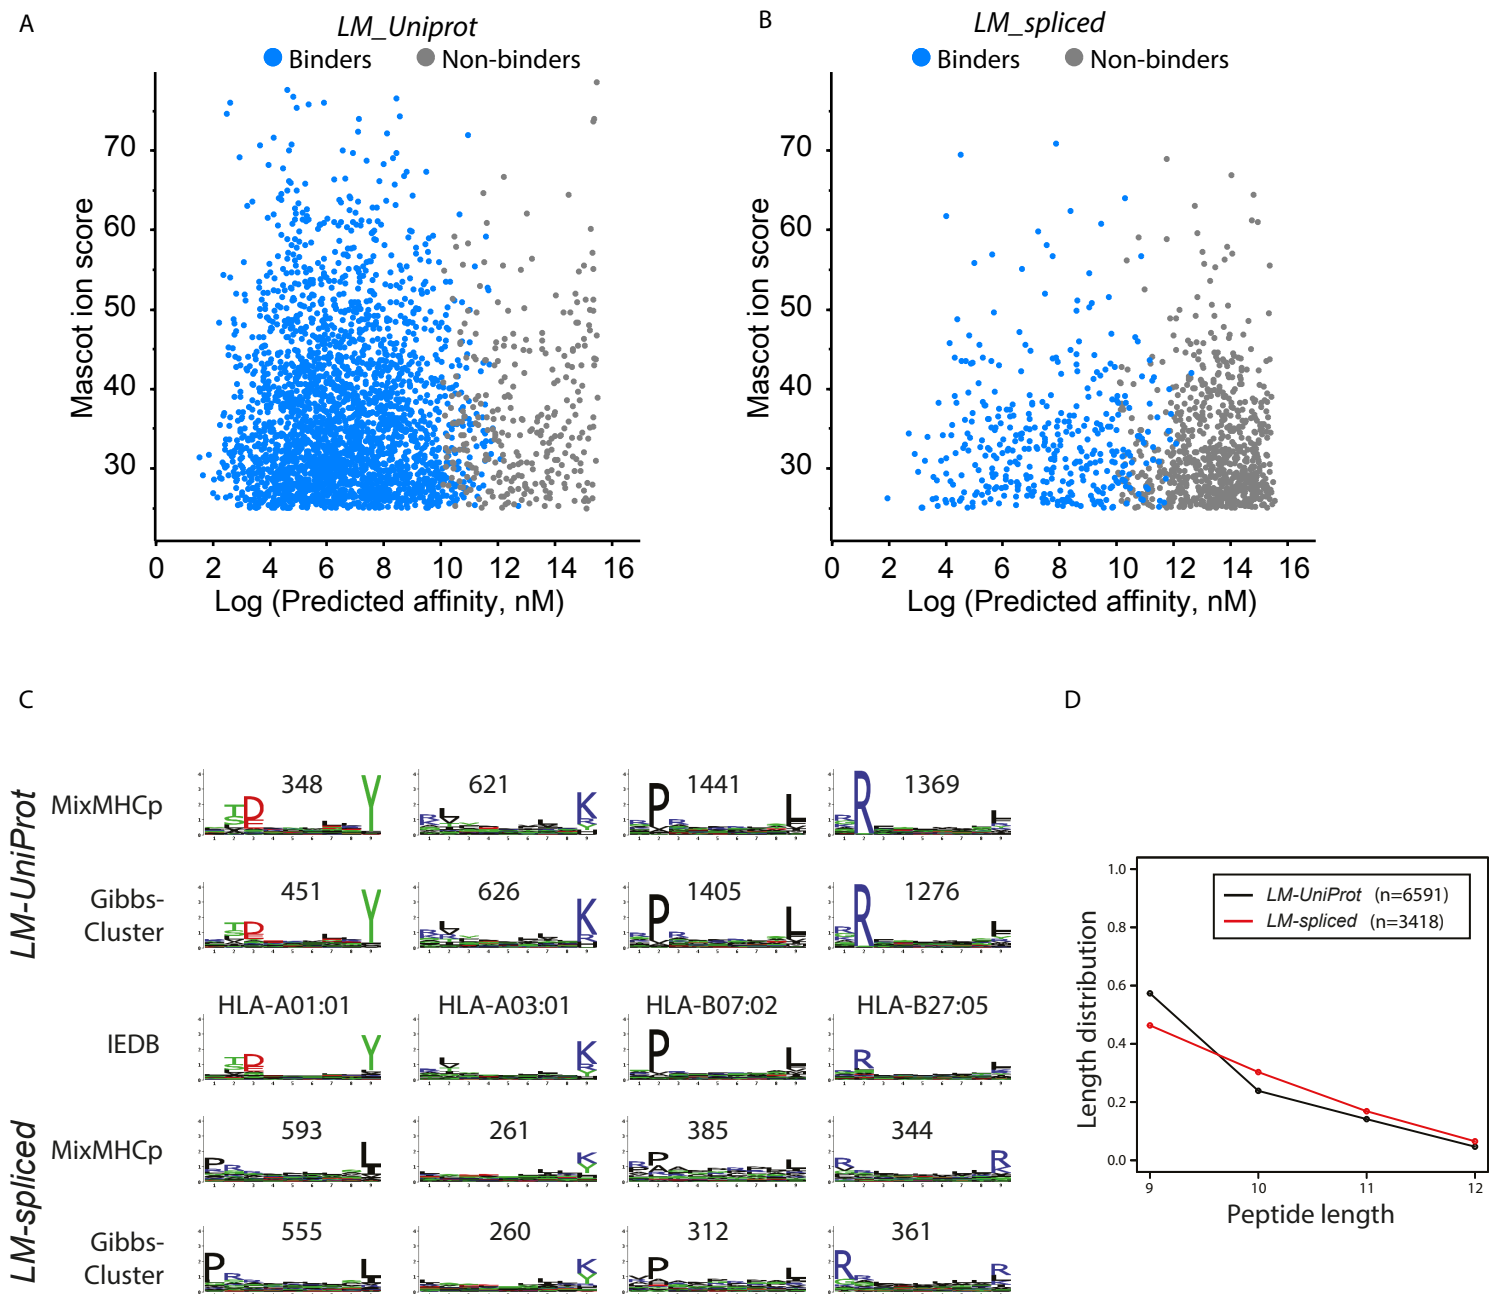

Supplemental Figure 1: Re-analysis of the Liepe et al. data available as Supplemental Data 2. A) Correlation of the predicted binding affinity by NetMHCpan and MS/MS identification scores of peptides identified by Liepe et al. as *LM\_UniProt* (A) and *LM\_spliced* (B) in the Fib dataset. Binders (rank top 2%) are marked in blue and non-binders in gray C) Motif deconvolution analysis with MixMHCp and GibbsCluster of the 9-mer *LM-UniProt* and *LM-spliced* peptides identified by Liepe et al. in the GR-LCL 2D dataset and comparison to known logos from IEDB for HLA-A01:01, HLA-A03:01 and HLA-B07:02 and HLA-B27:05. Motifs found in *LM-UniProt* peptides are highly reproducible and comparable to the known motifs from IEDB, while this is not the case for motifs found in *LM-spliced* peptides. D) Length distribution of the *LM-UniProt* and *LM-spliced* peptide identified by Liepe et al. in the GR-LCL 2D dataset.

A 9 mer peptides assign by MaxQuant as UniProt while originally identified as *LM\_spliced* by Mascot

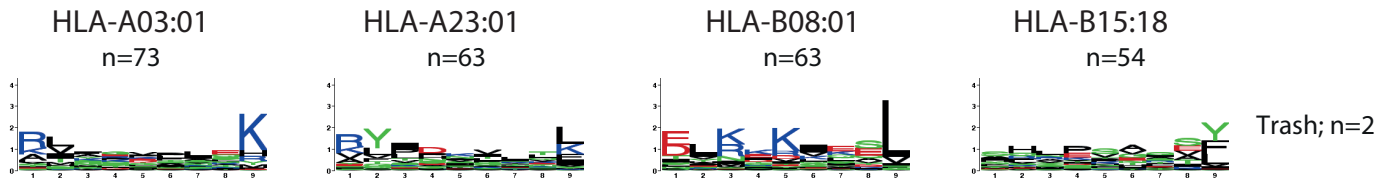

B 9 mer peptides Mascot assigned as *LM\_spliced* while MaxQuant as UniProt

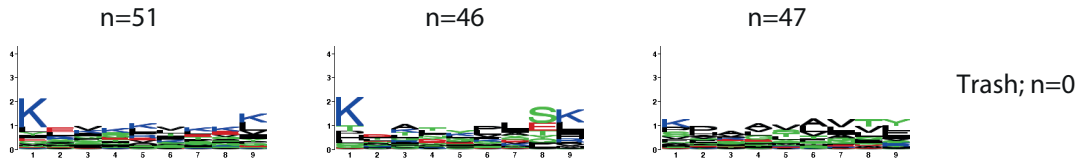

C All remaining 9 mer *LM\_spliced* after removal of PSMs assign by MaxQuant as UniProt

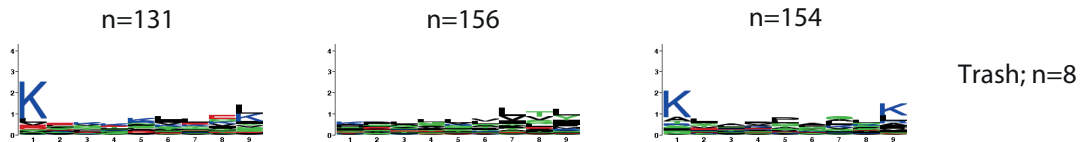

Supplemental Figure 2: Motif deconvolution analysis with MixMHCp of the 9-mer peptide fraction of A) sequences matching UniProt proteins by MaxQuant that the same MS/MS scans have been originally identified as *LM\_spliced* by Liepe et al., B) Mascot assigned *LM\_spliced* peptides that MaxQuant assigned the same MS/MS scans as UniProt matches, and C) remaining *LM\_spliced* peptides after removal of conflicting PSMs that have been assigned as UniProt in MaxQuant search. The list of peptides has been extracted from Supplemental Data 6.

A

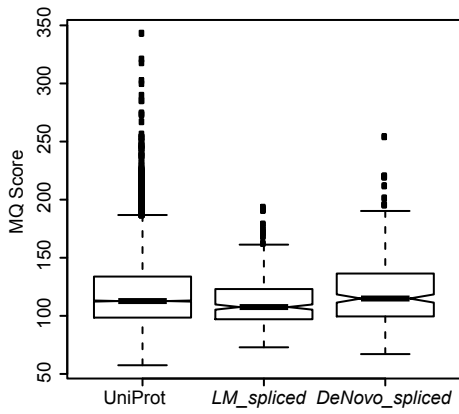

B

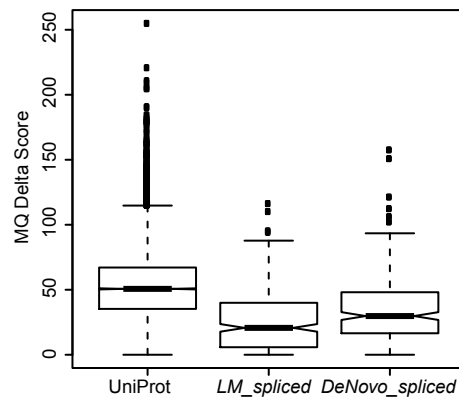

C

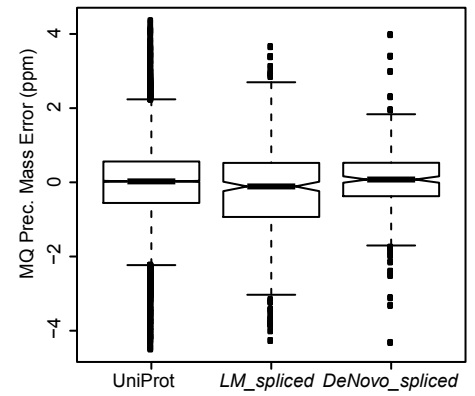

D

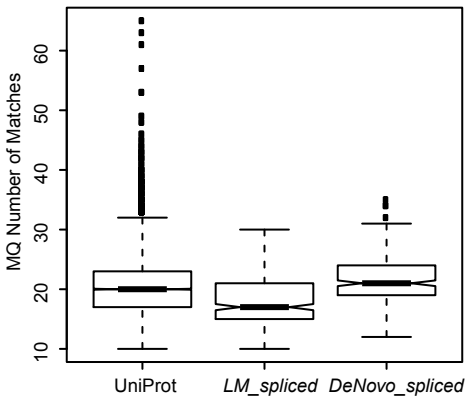

E

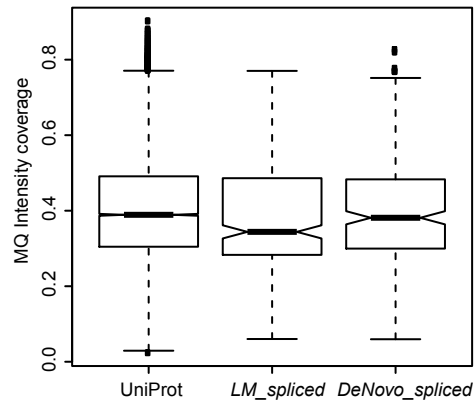

F

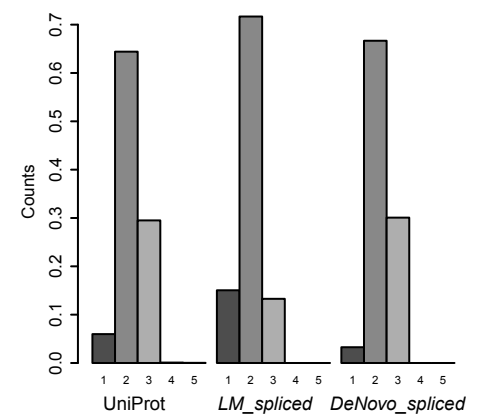

G

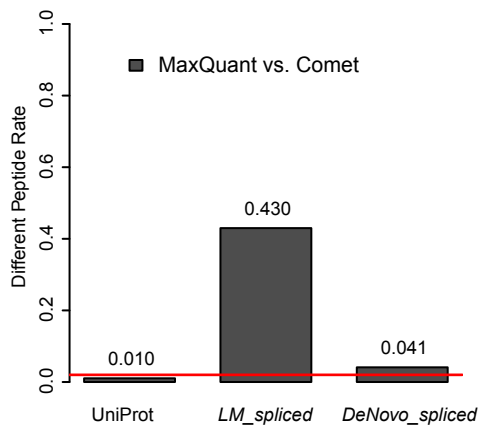

Supplemental Figure 3: Compared to UniProt and *DeNovo\_spliced* peptides, *LM\_spliced* peptides were characterized with A) lower Andromeda score for the best MS/MS spectrum, B) lower score difference to the second best identified peptide, C) higher absolute precursor mass deviation, D) fewer peaks matching to the predicted fragmentation spectrum, E) lower fraction of total MS/MS peak intensity matched, and F) a larger fraction of singly charged MS/MS spectra matched. G) Rate of disagreement in peptide identification between MaxQuant and Comet for MS/MS scans matched to UniProt, *LM\_spliced* and *DeNovo\_spliced* peptides.

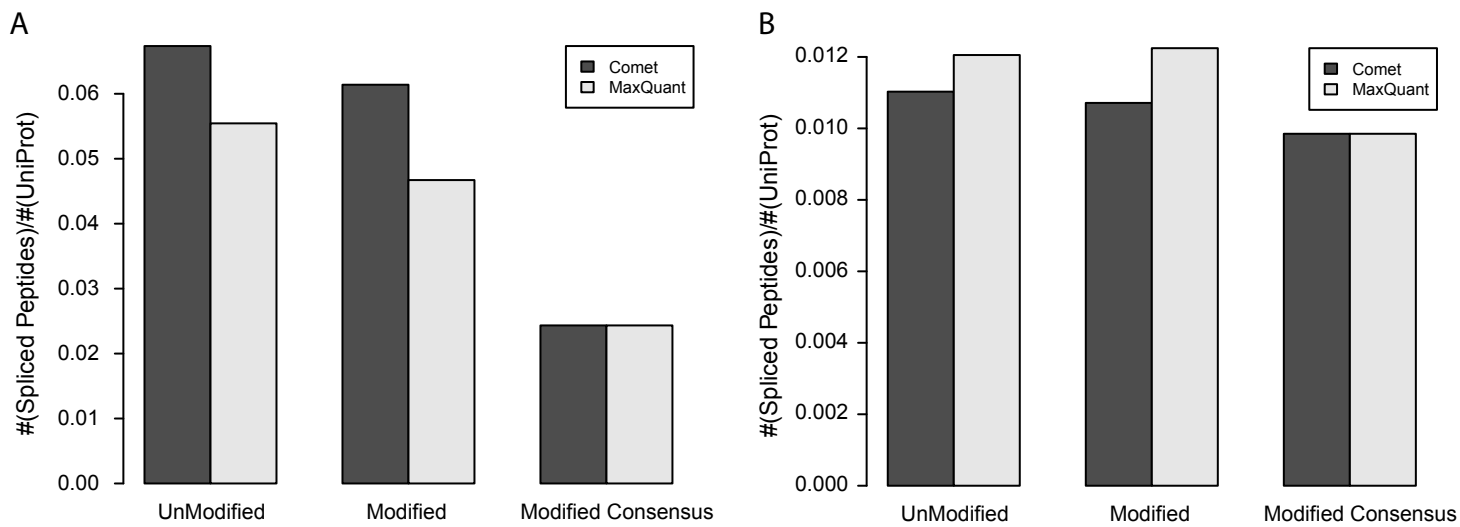

Supplemental Figure 4: Ratio of spliced peptide count and UniProt peptide count for the *LM\_spliced* (A) and *DeNovo\_spliced* (B) peptides for all Fib samples. Variable modifications are as specified in the text. For 'Modified consensus' the peptide counts are calculated on the subset of PSMs where Comet and MaxQuant agreed, therefore, the values for Comet and MaxQuant are the same.

Supplemental Figure 5: Comparison of MS/MS annotations of endogenous and synthetic counterparts of 21 pairs of *LM\_spliced* and their UniProt alternatives, and of the three *LM\_spliced* peptides. For the 21 pairs we provide: MS/MS annotation of endogenous HLA-Ip as *LM\_spliced* peptides, MS/MS annotation of the synthetic counterpart of the *LM\_spliced*, MS/MS annotation of the same endogenous HLA-Ip as an alternative UniProt peptide, and MS/MS annotation of the synthetic counterpart of the alternative UniProt peptide. For the three *LM\_spliced* peptides we provide MS/MS annotations of endogenous HLA-Ip and of the synthetic counterparts.

Fib spectrum 3448; spliced peptide sequence KWKVTASV

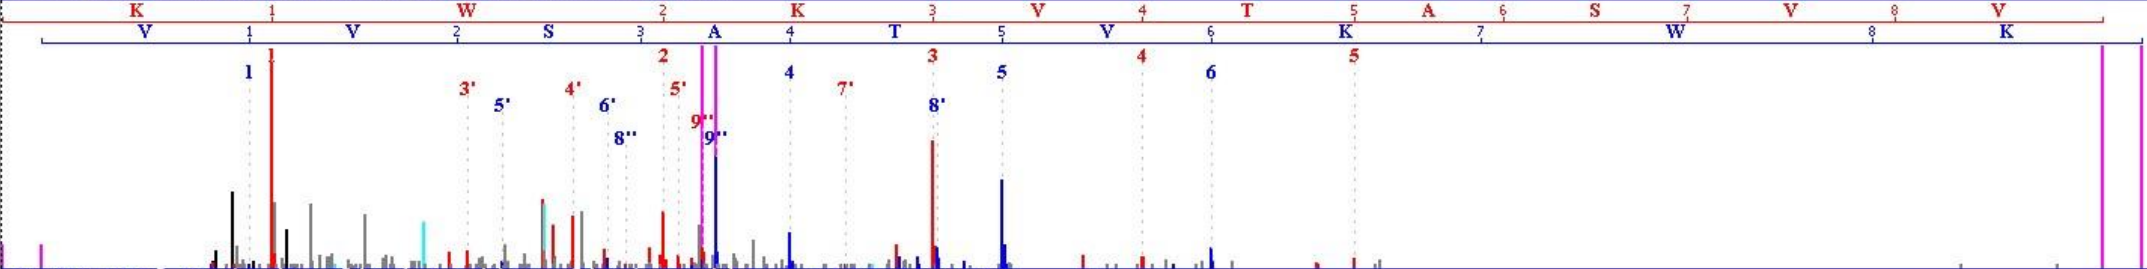

spectrum of synthetic spliced peptide; spliced peptide sequence KWKVTASV

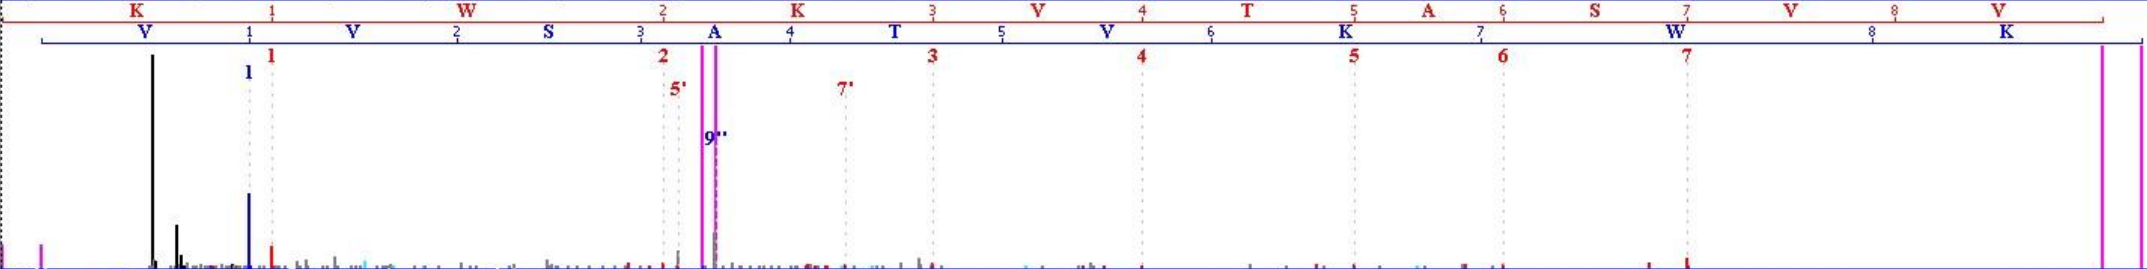

Fib spectrum 3448; alternative peptide sequence RTGKVTVEK

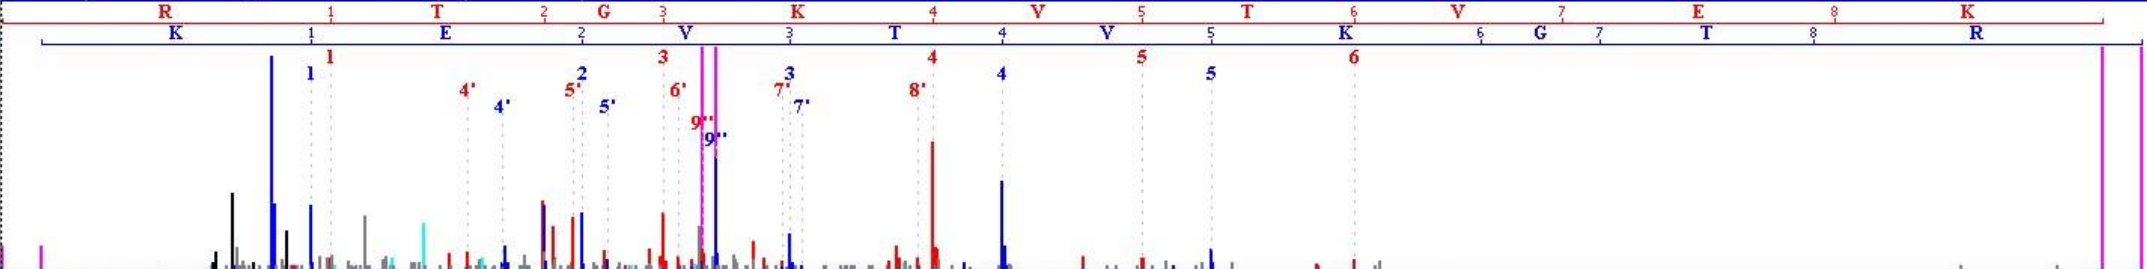

spectrum of synthetic alternative peptide; alternative peptide sequence RTGKVTVEK

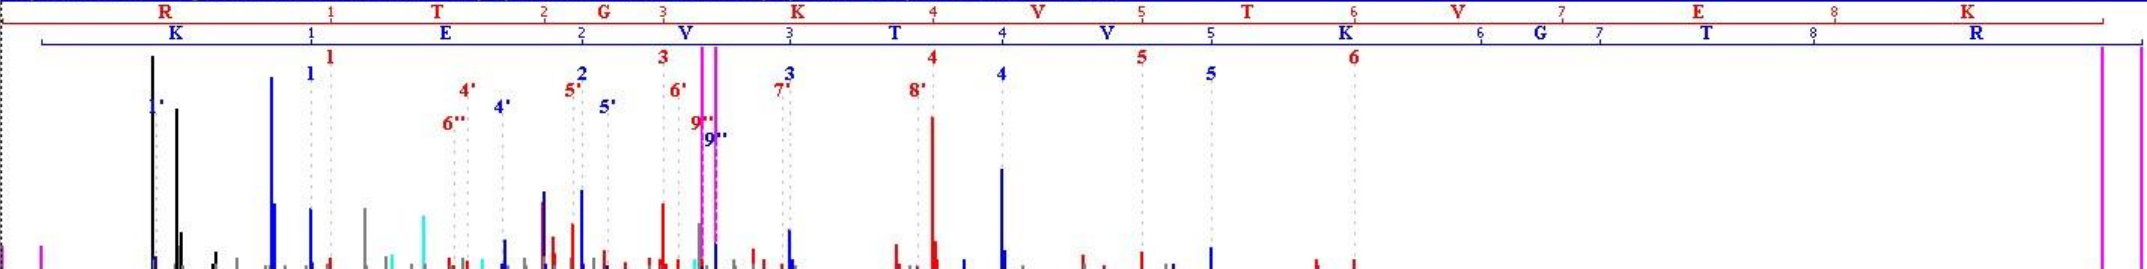

Fib spectrum 3676; spliced peptide sequence KKLMPGKKEL

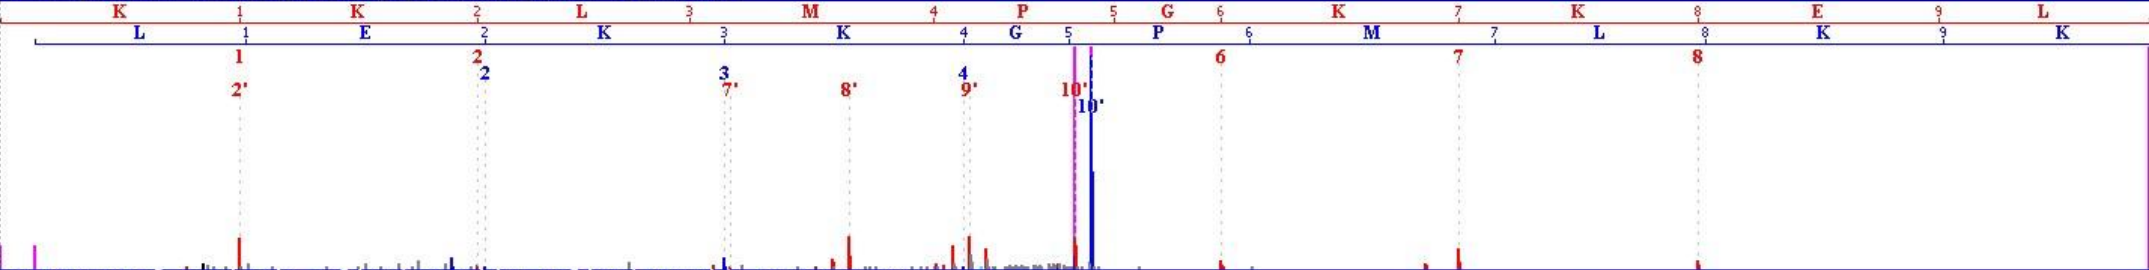

spectrum of synthetic spliced peptide; spliced peptide sequence KKLMPGKKEL

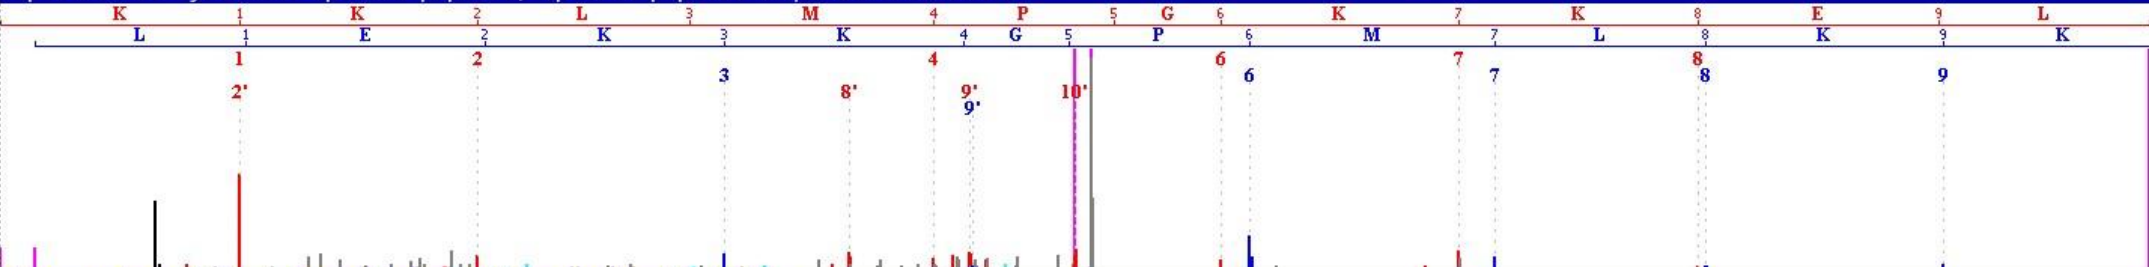

Fib spectrum 3676; alternative peptide sequence ELRQKKEL

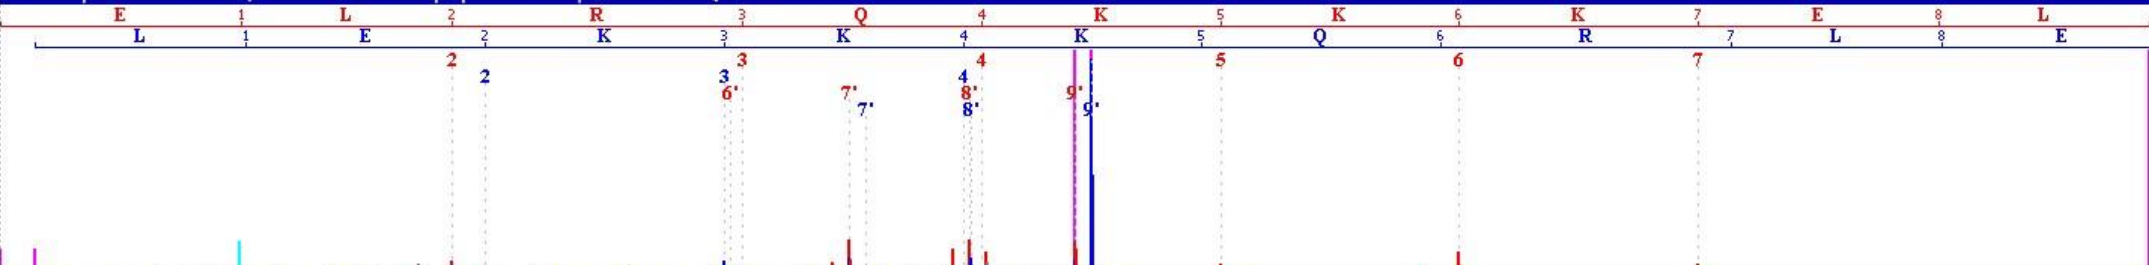

spectrum of synthetic alternative peptide; alternative peptide sequence ELRQKKEL

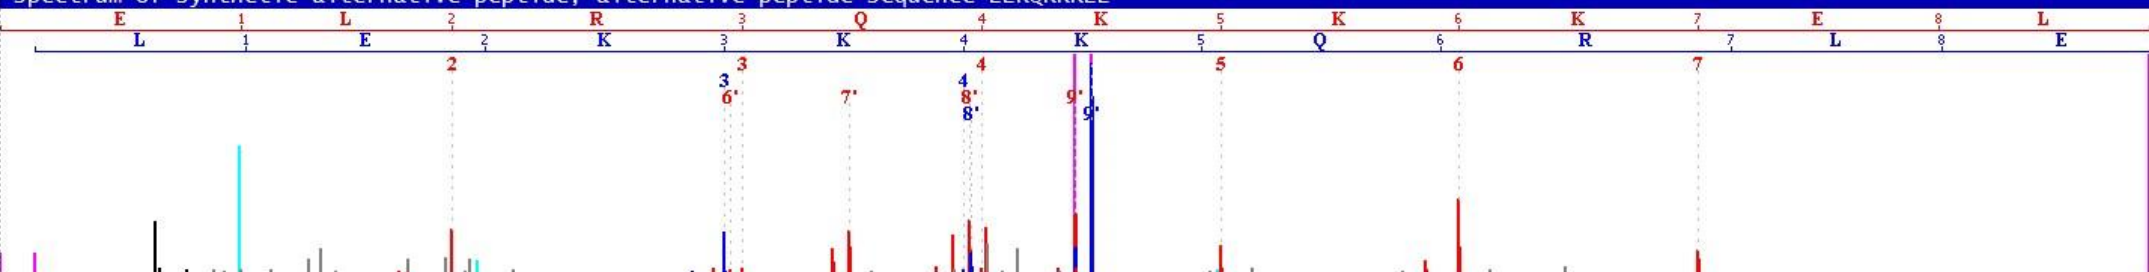

100 200 300 400 500 600 700 800 900 1000 1100

Fib spectrum 3818; spliced peptide sequence KGGCKPKAAP

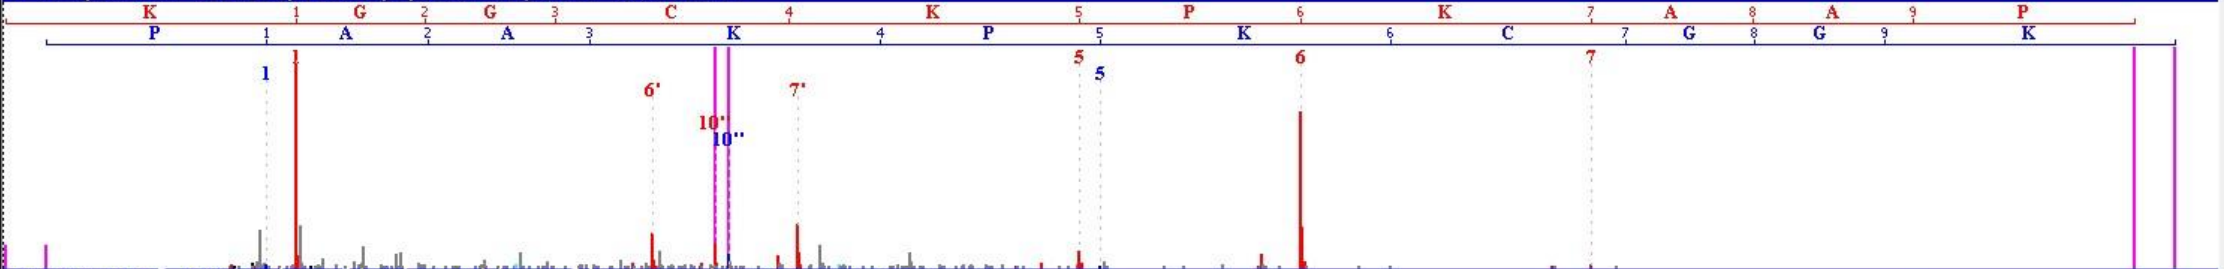

spectrum of synthetic spliced peptide; spliced peptide sequence KGGCKPKAAP

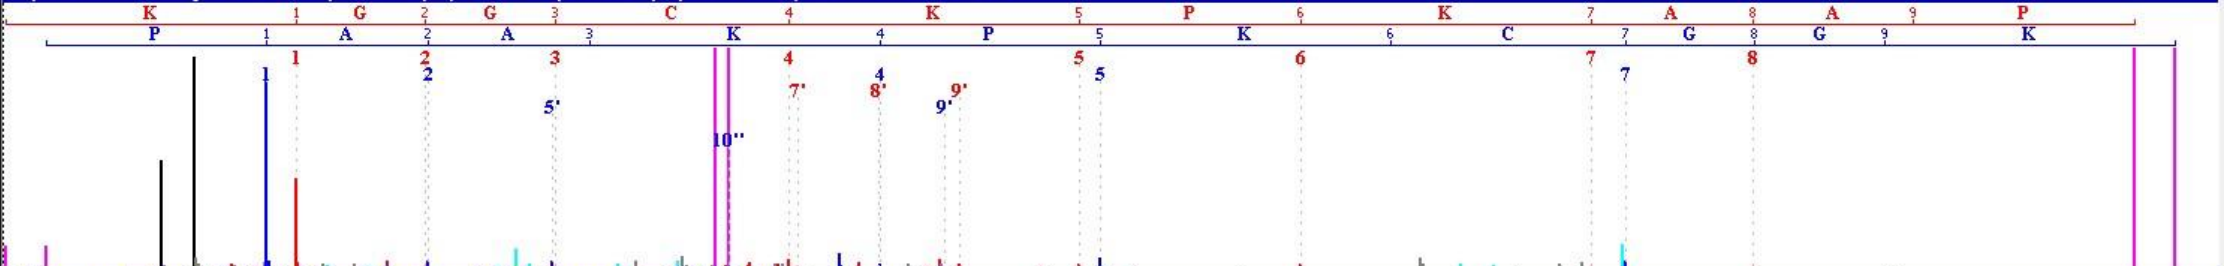

Fib spectrum 3818; alternative peptide sequence GTVKPNANR

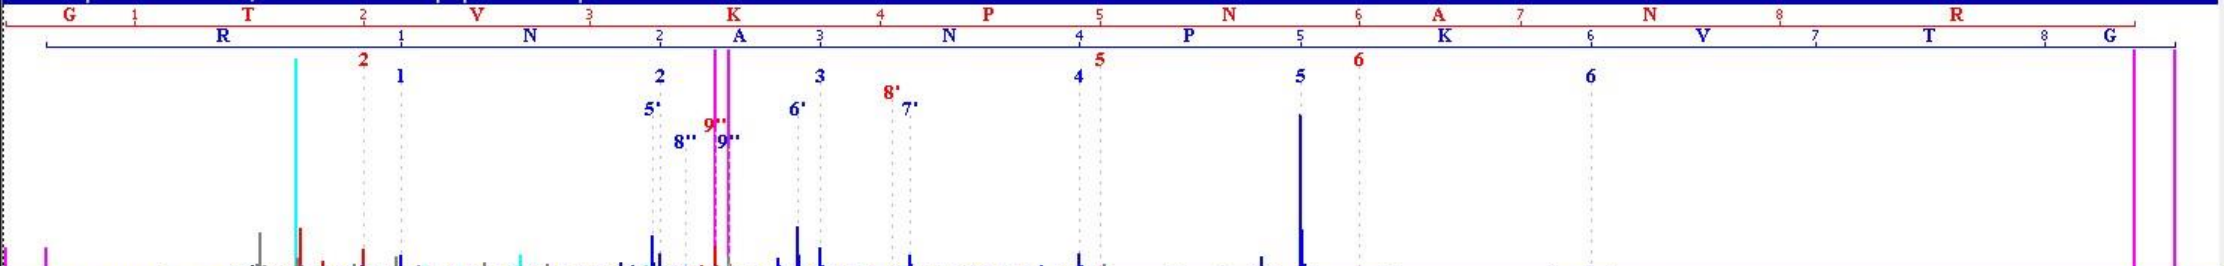

spectrum of synthetic alternative peptide; alternative peptide sequence GTVKPNANR

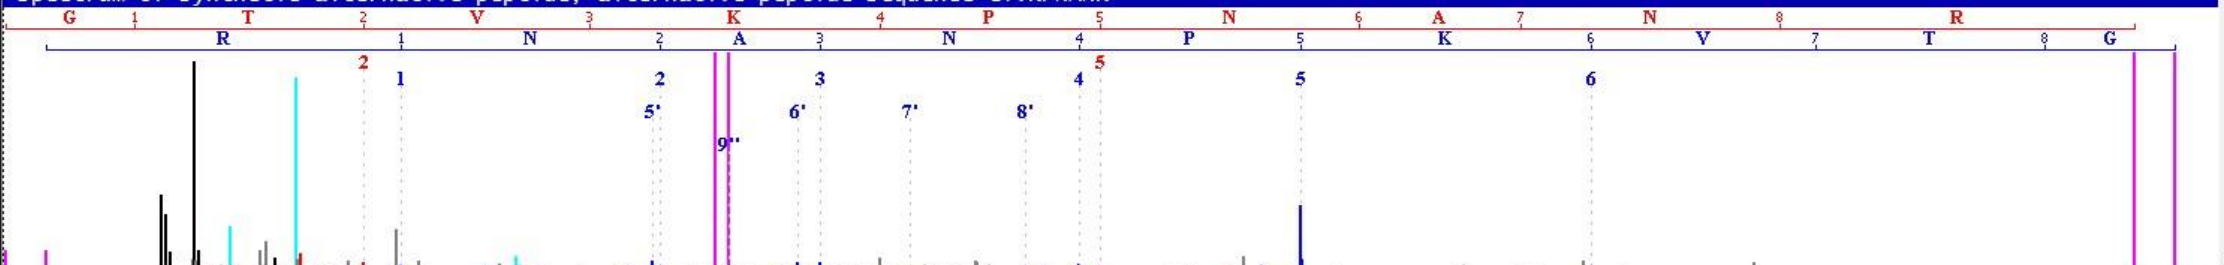

50 100 150 200 250 300 350 400 450 500 550 600 650 700 750 800 850 900 950



Fib spectrum 4045; spliced peptide sequence KRQPESGIK

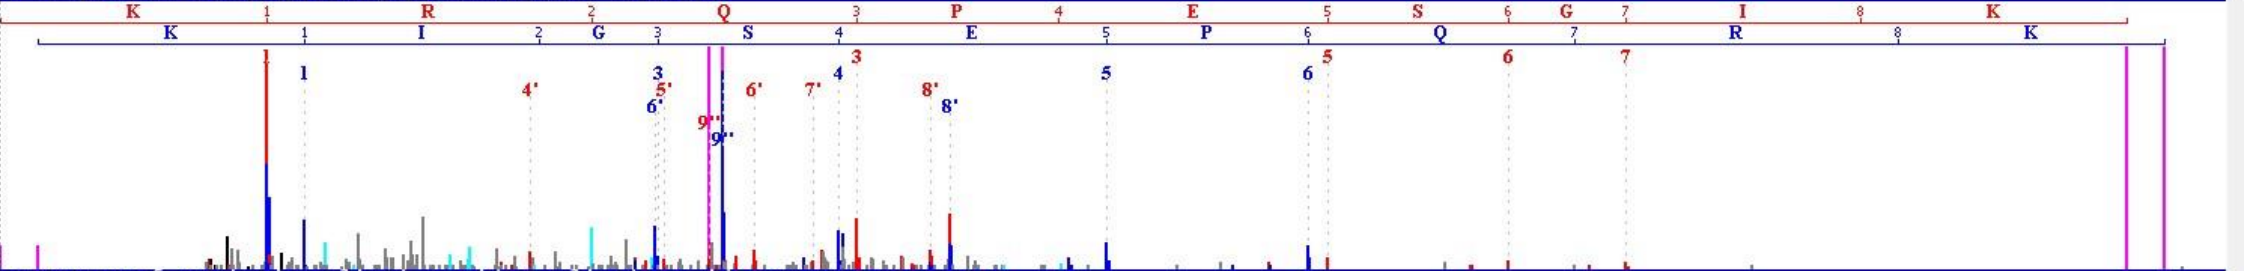

spectrum of synthetic spliced peptide; spliced peptide sequence KRQPESGIK

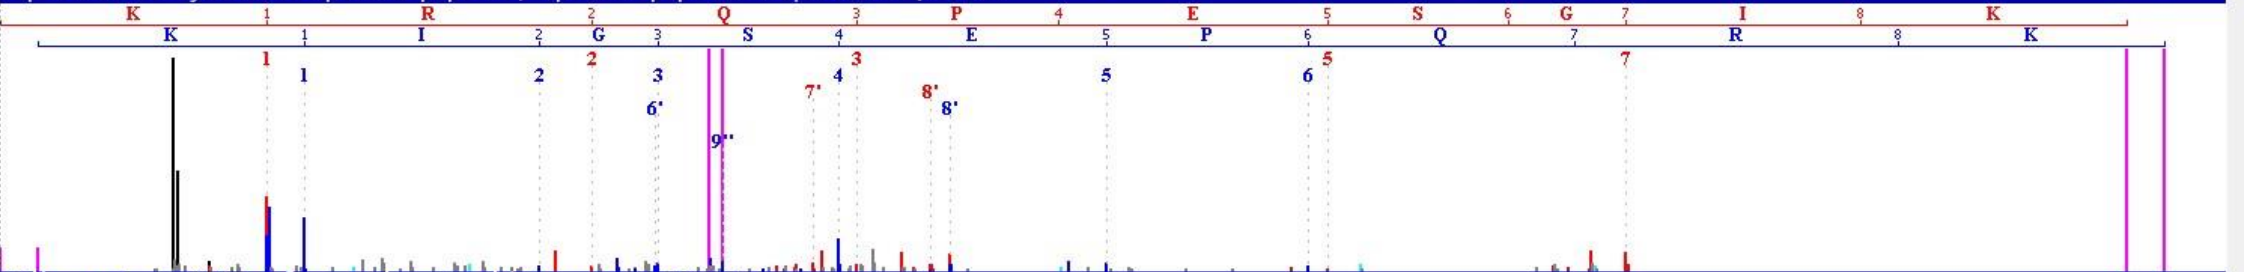

Fib spectrum 4045; alternative peptide sequence RQKPESLQK

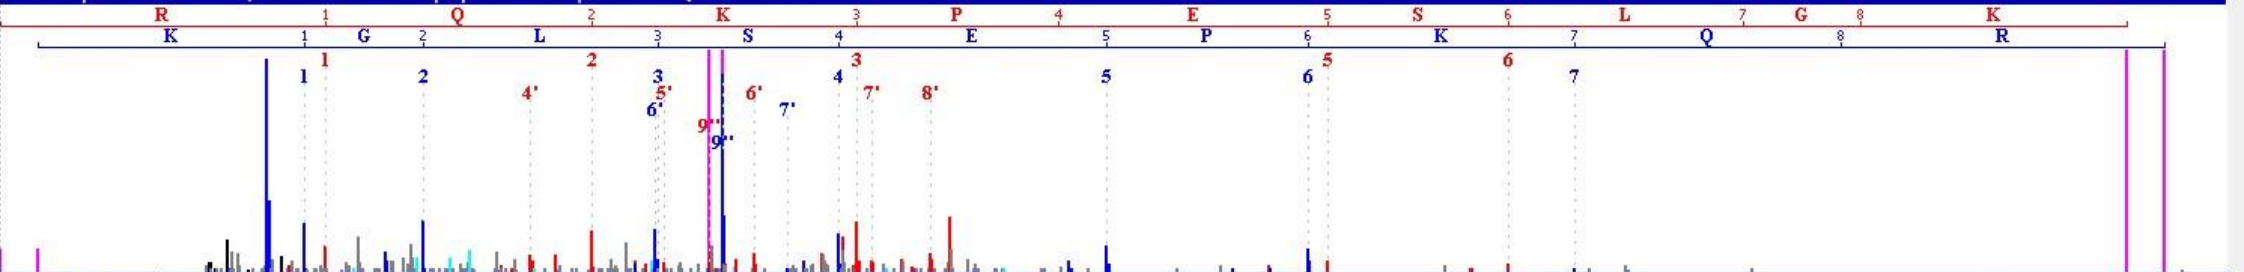

spectrum of synthetic alternative peptide; alternative peptide sequence RQKPESLQK

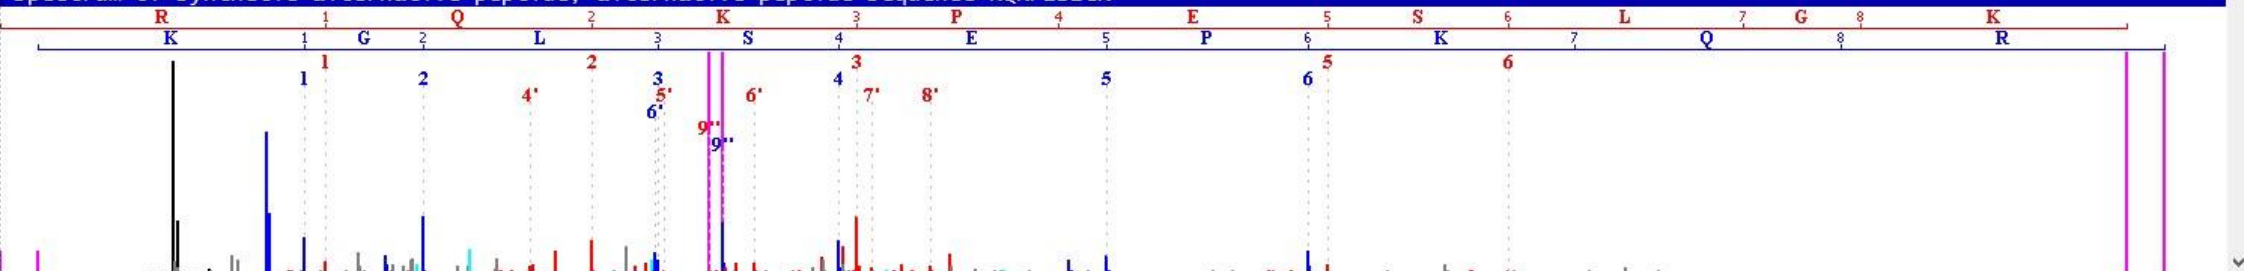

Fib spectrum 4234; spliced peptide sequence SGVSRKPAPG

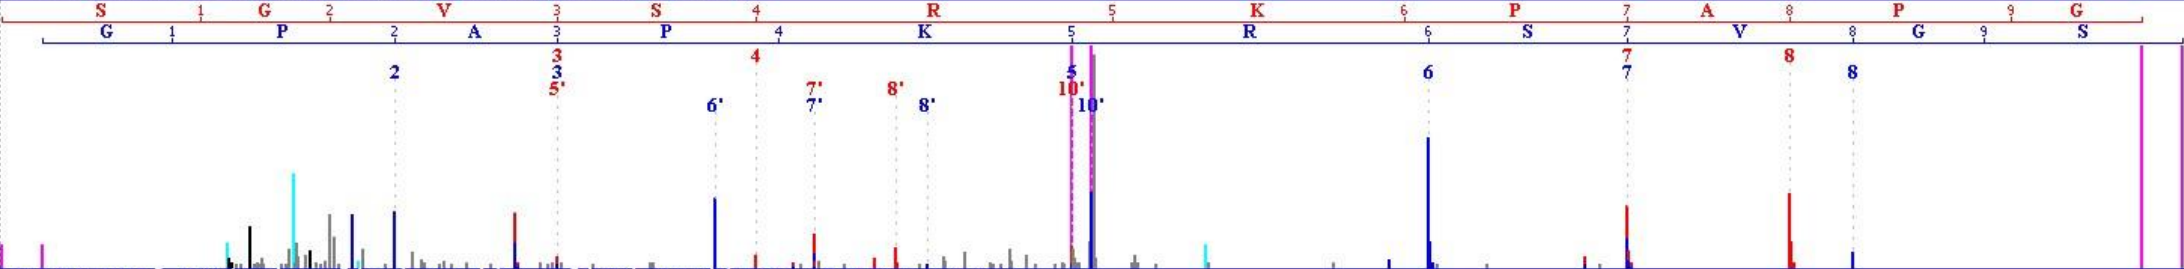

spectrum of synthetic spliced peptide; spliced peptide sequence SGVSRKPAPG

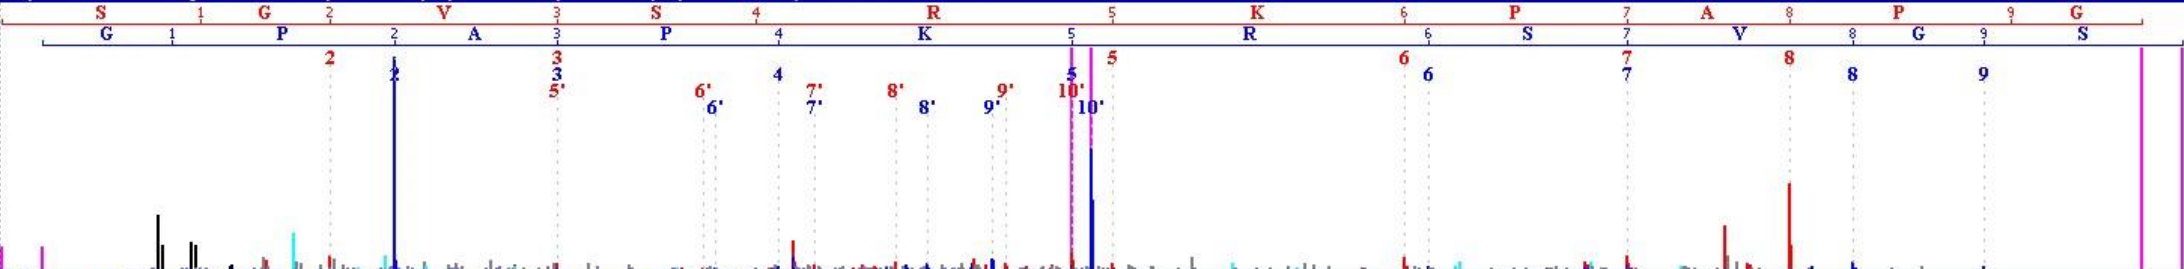

Fib spectrum 4234; alternative peptide sequence ATASPPRQK

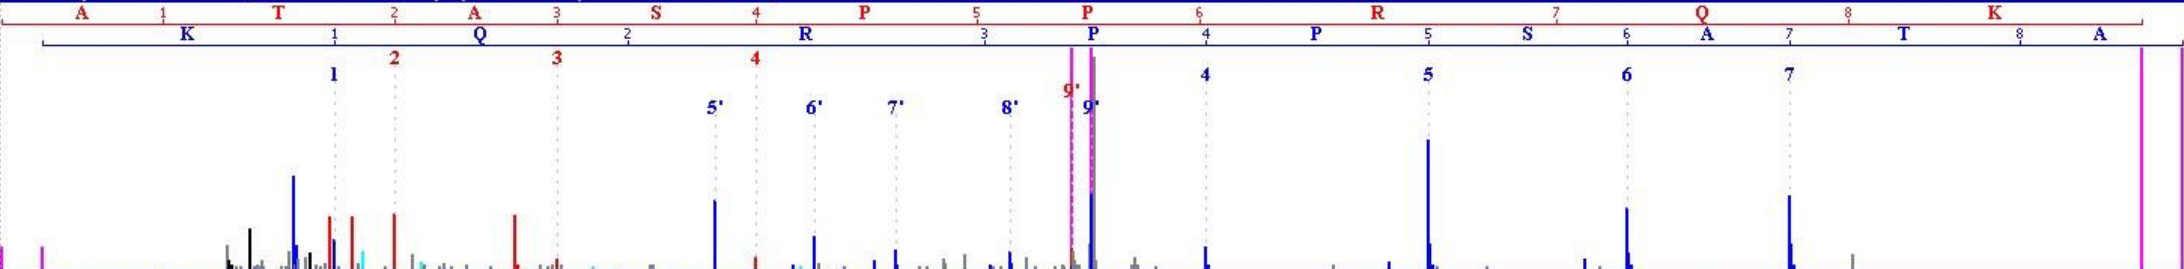

spectrum of synthetic alternative peptide; alternative peptide sequence ATASPPRQK

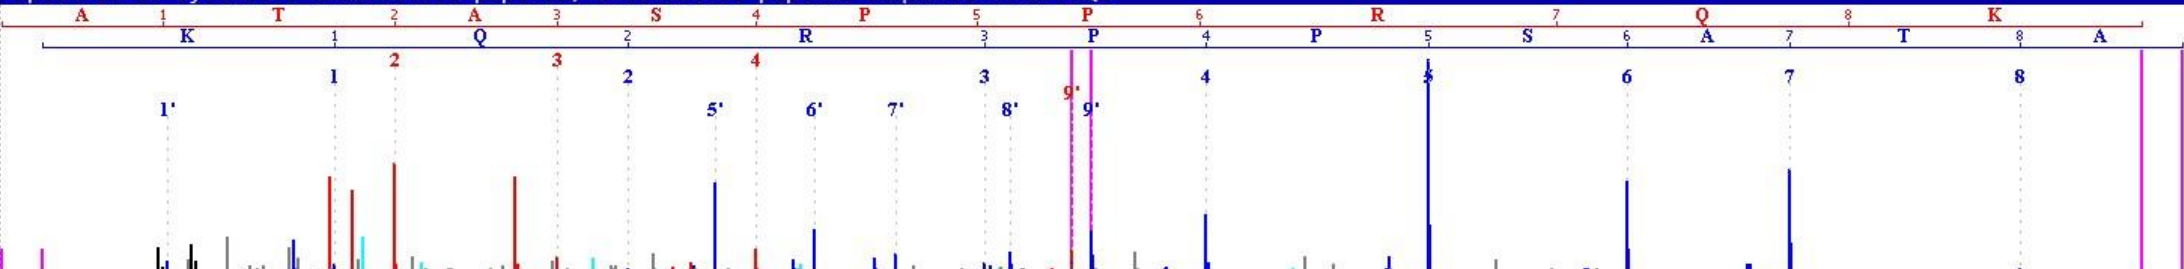

Fib spectrum 4277; spliced peptide sequence IVDKMAPGSASK

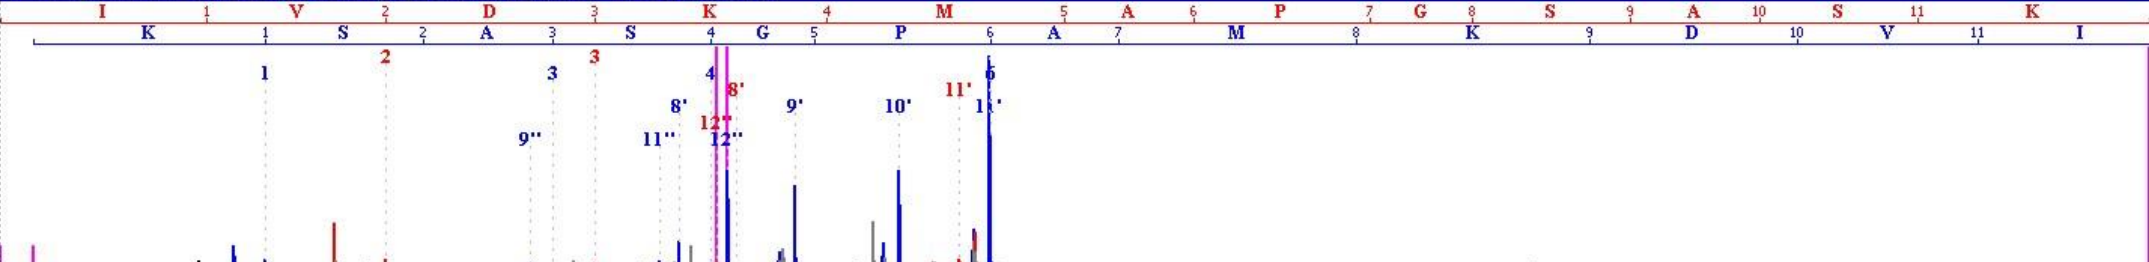

spectrum of synthetic spliced peptide; spliced peptide sequence IVDKMAPGSASK

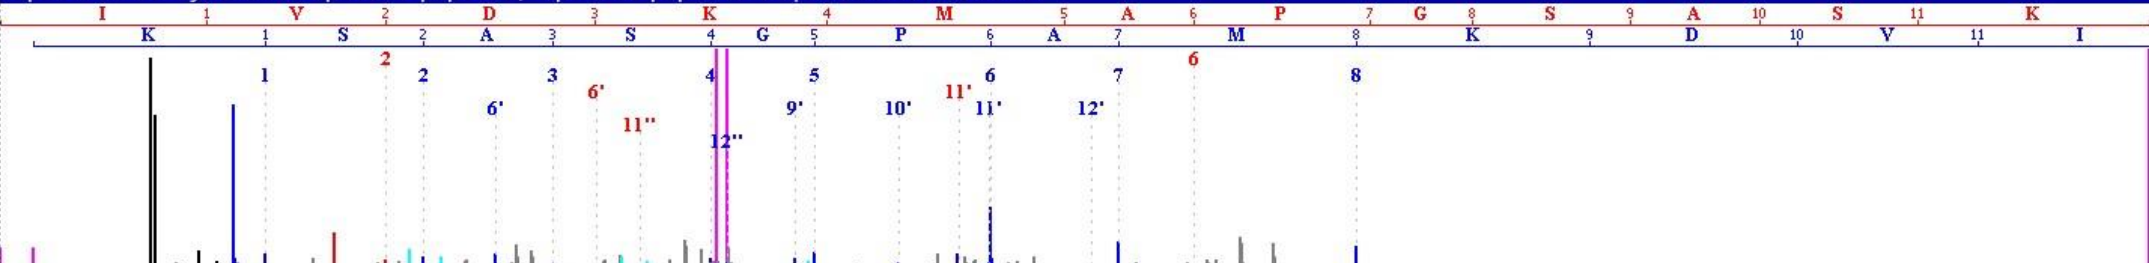

Fib spectrum 4277; alternative peptide sequence IVDDRGRSTGK

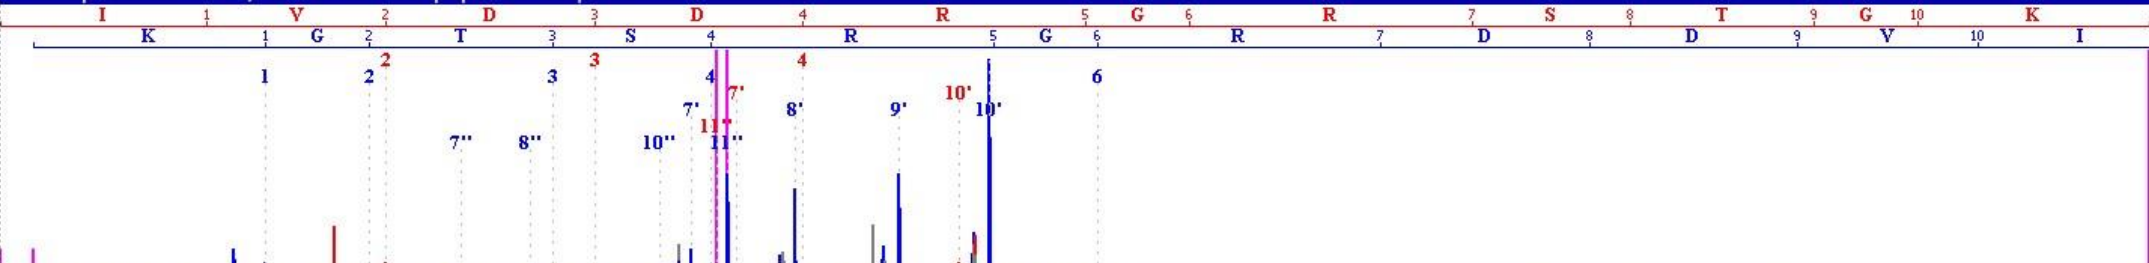

spectrum of synthetic alternative peptide; alternative peptide sequence IVDDRGRSTGK

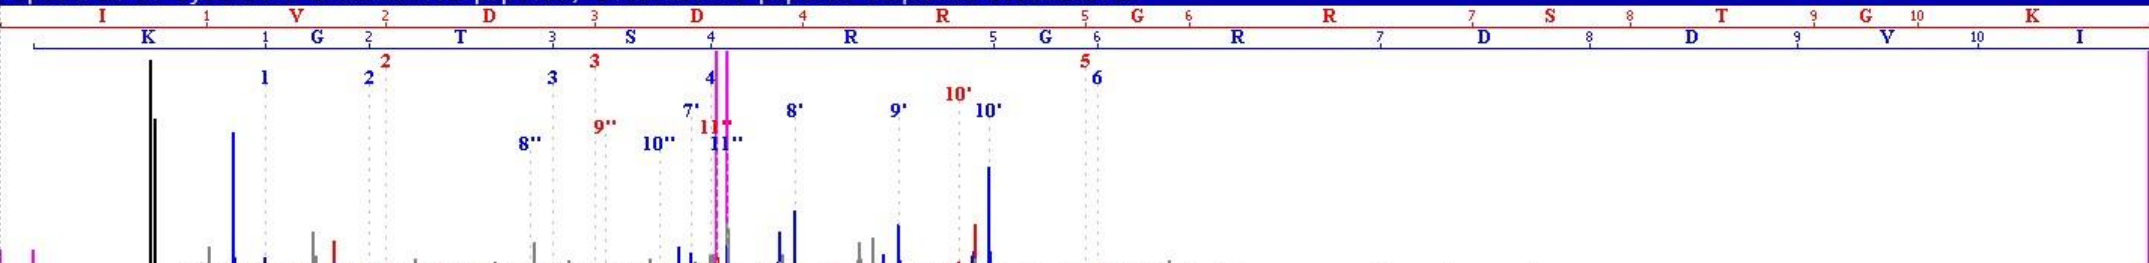

Fib spectrum 4280; spliced peptide sequence LENKKGKAL

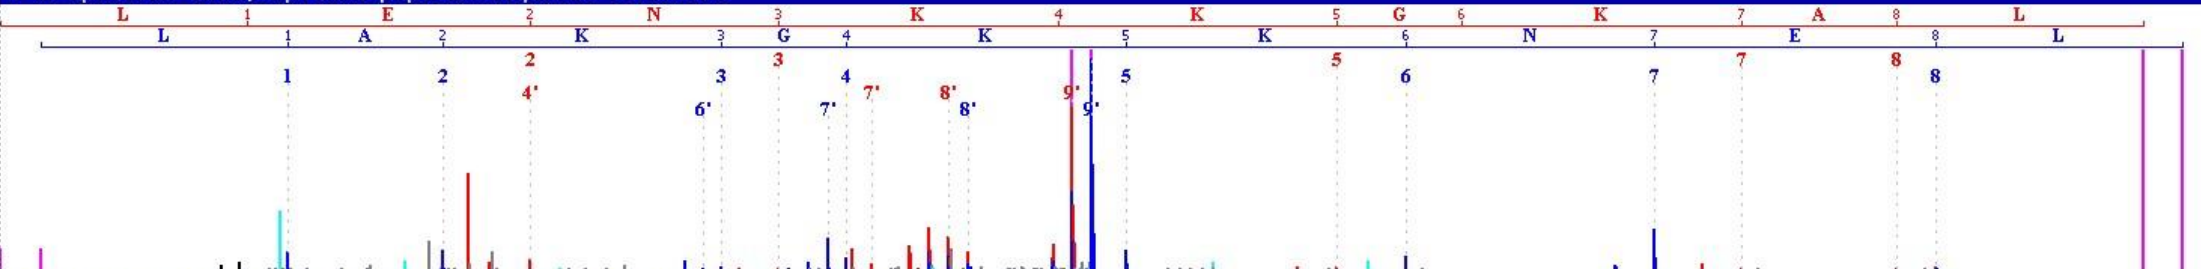

spectrum of synthetic spliced peptide; spliced peptide sequence LENKKGKAL

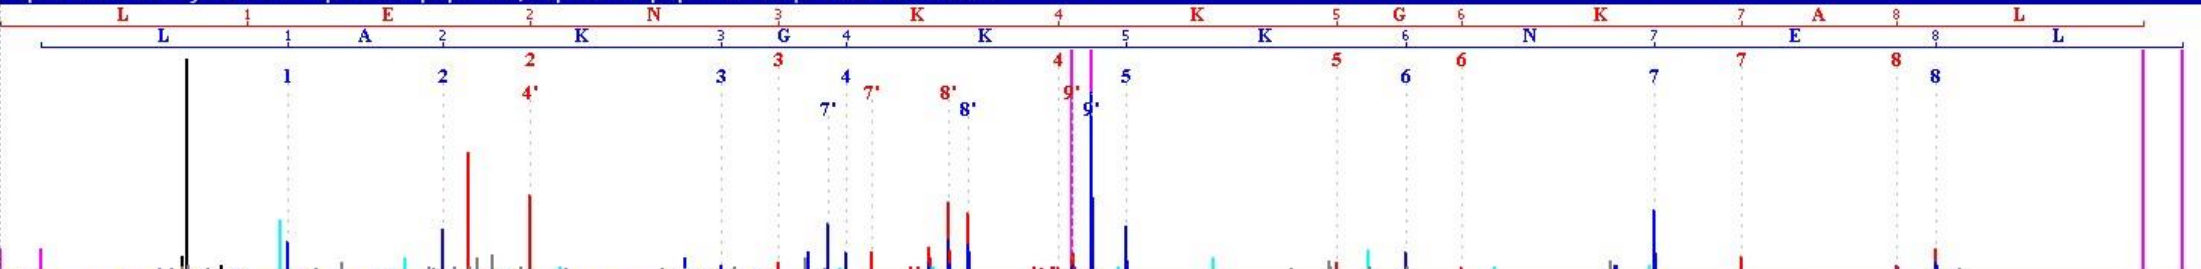

Fib spectrum 4280; alternative peptide sequence EINKKGKAL

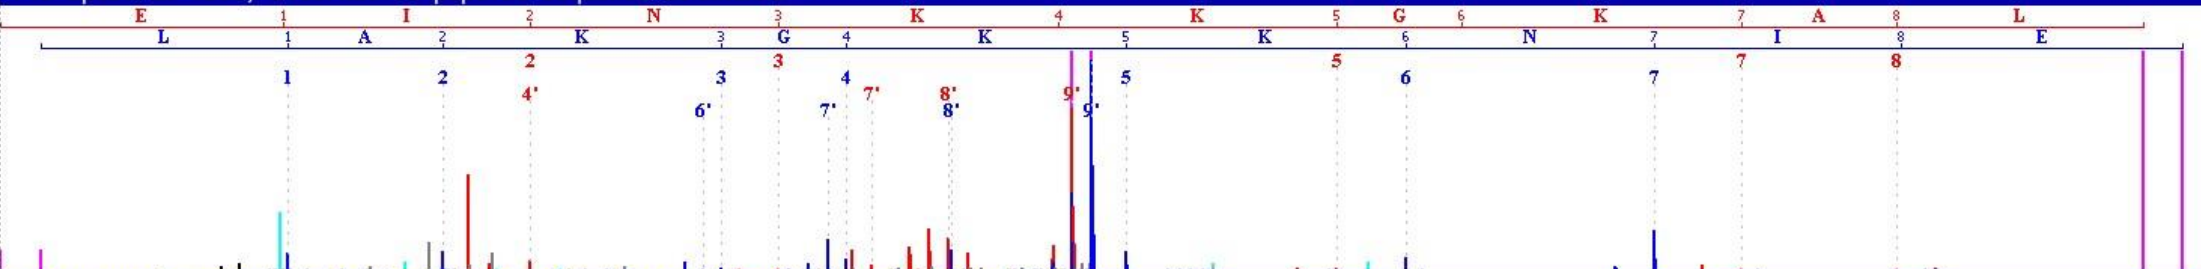

spectrum of synthetic alternative peptide; alternative peptide sequence EINKKGKAL

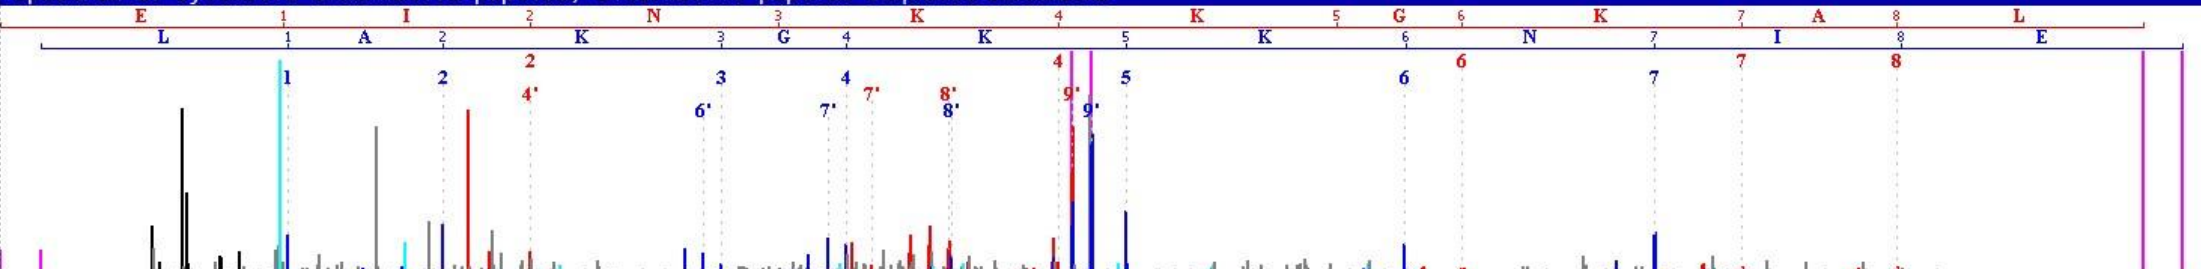

Fib spectrum 4289; spliced peptide sequence KAEKSHDEPG

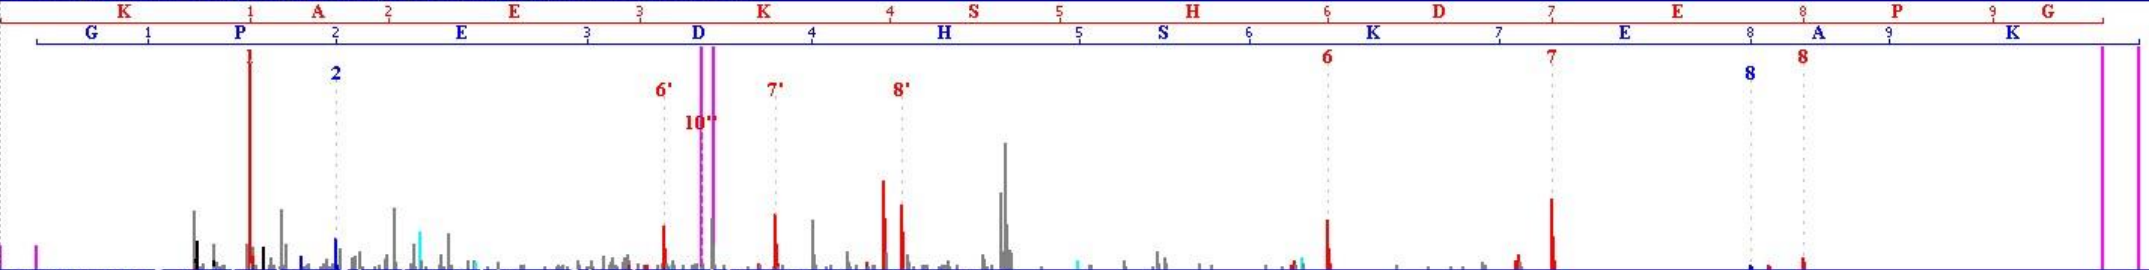

spectrum of synthetic spliced peptide; spliced peptide sequence KAEKSHDEPG

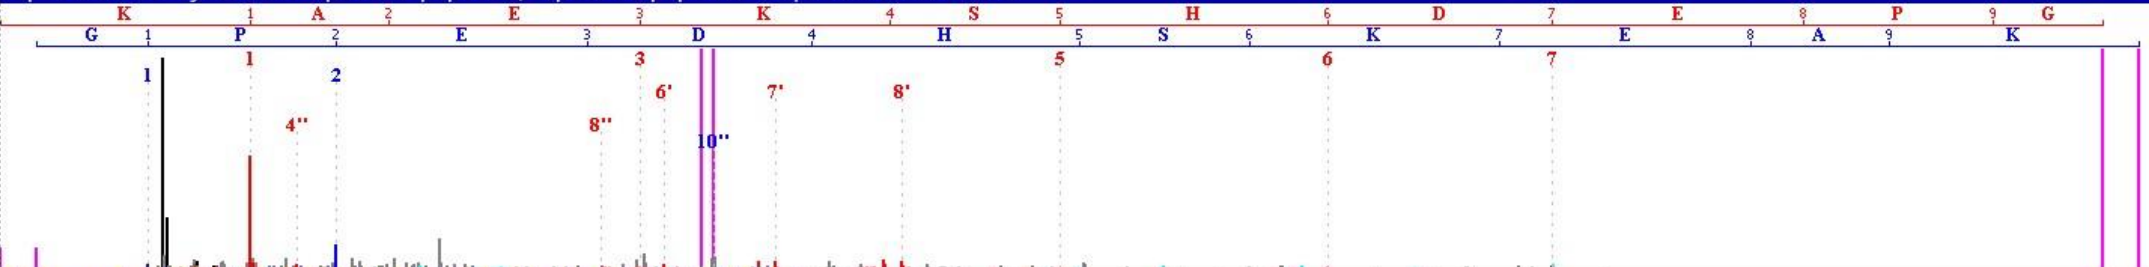

Fib spectrum 4289; alternative peptide sequence ATEDSQRYK

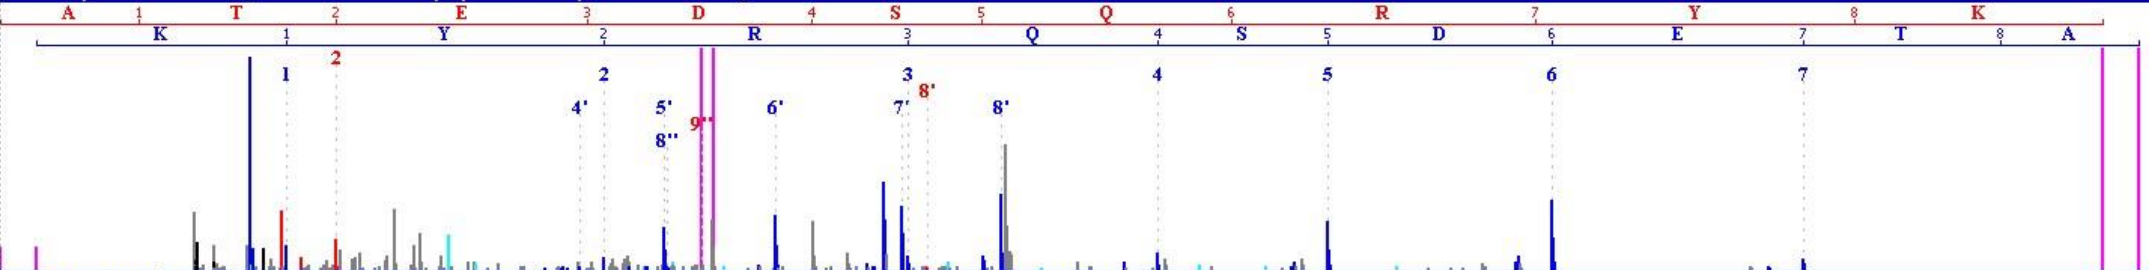

spectrum of synthetic alternative peptide; alternative peptide sequence ATEDSQRYK

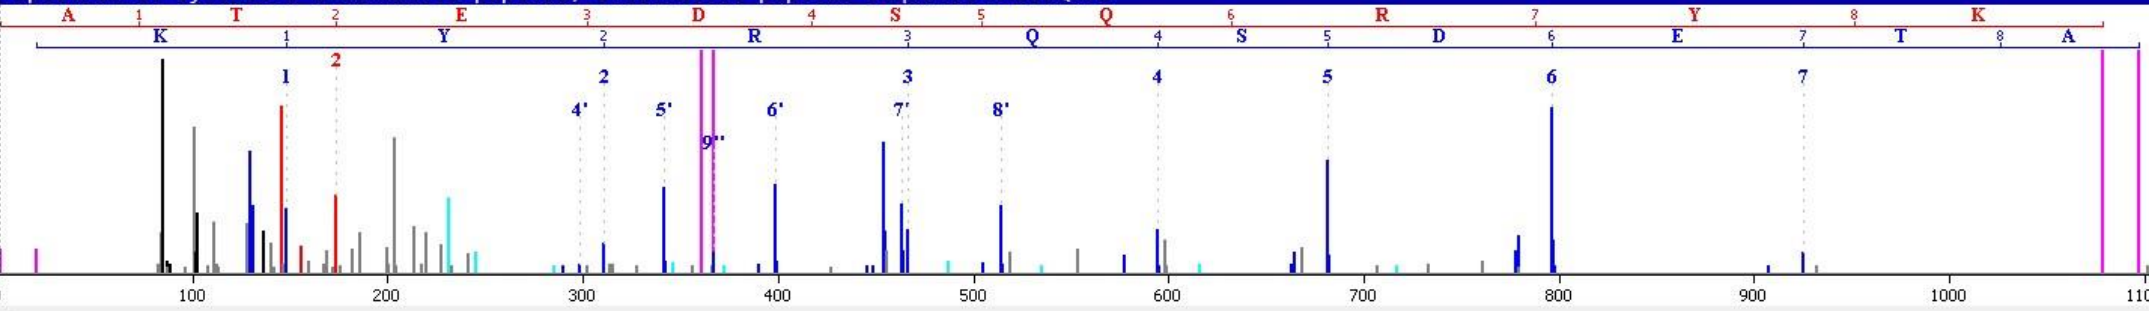

Fib spectrum 4301; spliced peptide sequence TRSPVKQPR

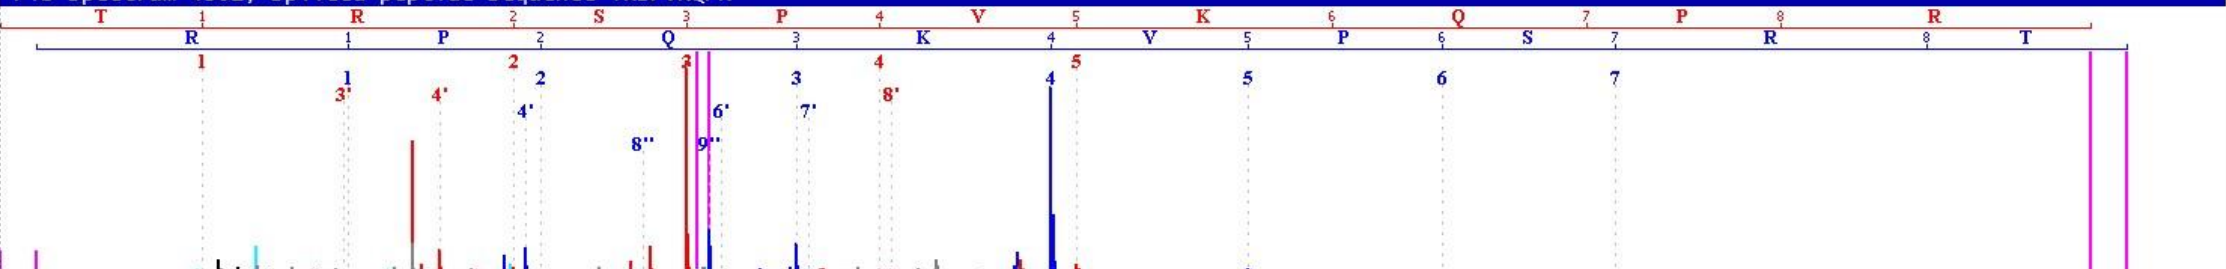

spectrum of synthetic spliced peptide; spliced peptide sequence TRSPVKQPR

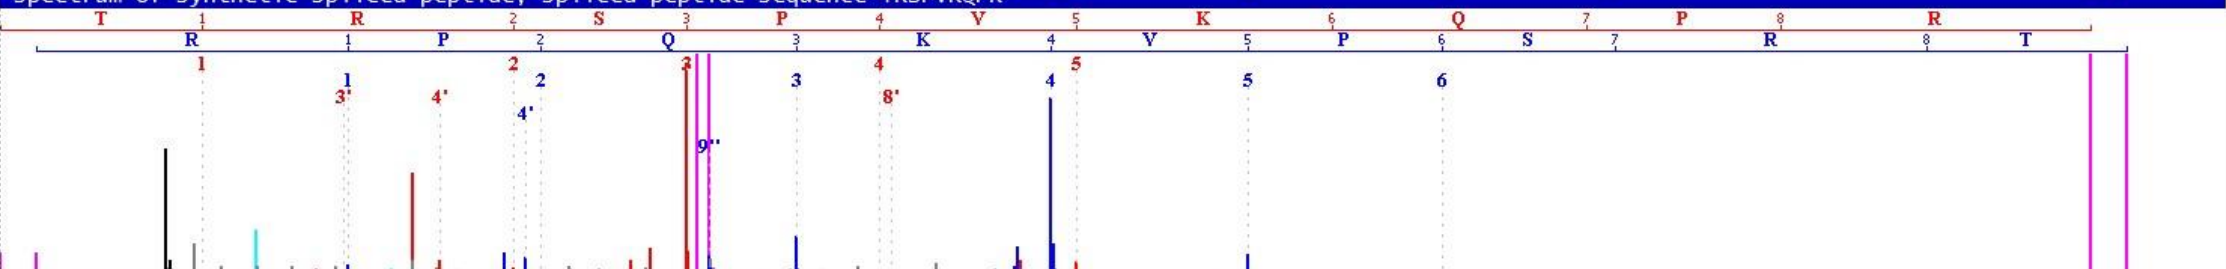

Fib spectrum 4301; alternative peptide sequence RTSPVPRQK

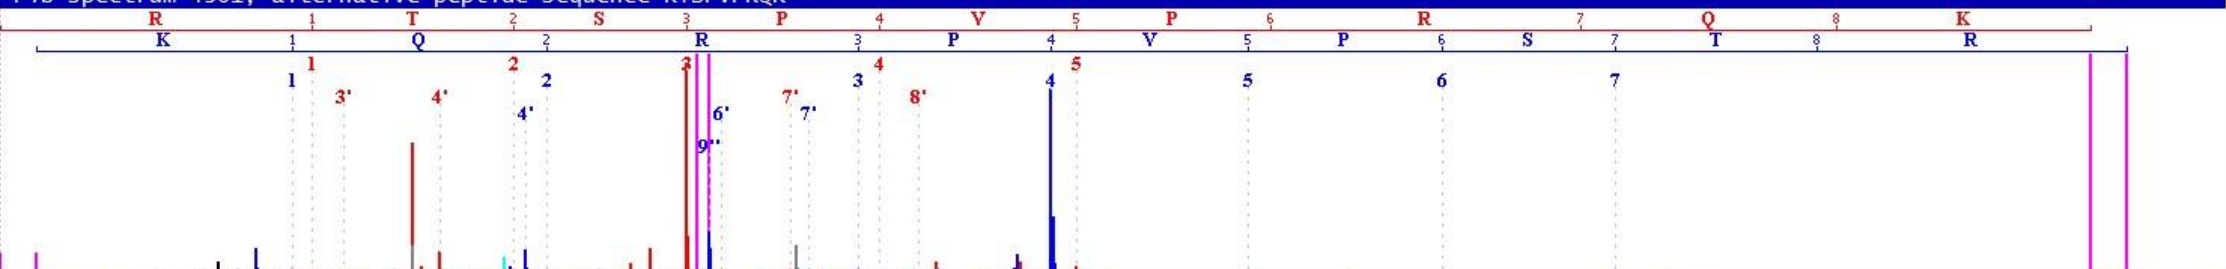

spectrum of synthetic alternative peptide; alternative peptide sequence RTSPVPRQK

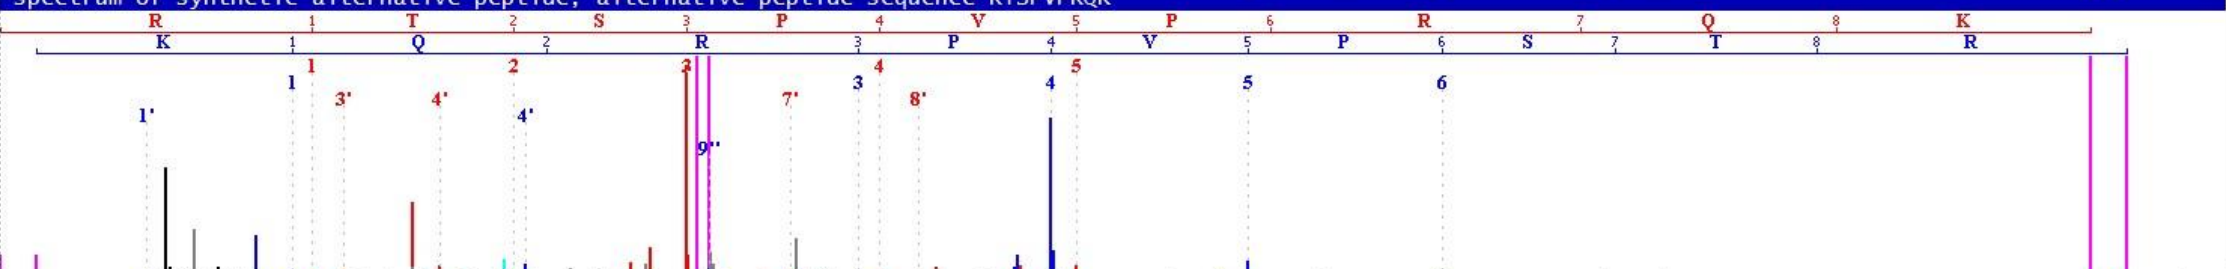

Fib spectrum 4430; spliced peptide sequence LGSEHRLSNK

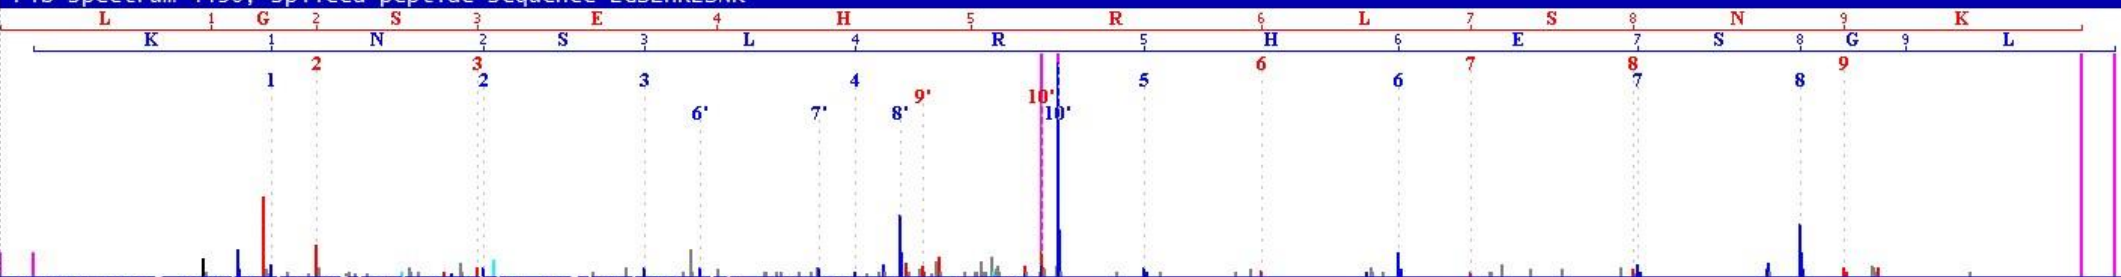

spectrum of synthetic spliced peptide; spliced peptide sequence LGSEHRLSNK

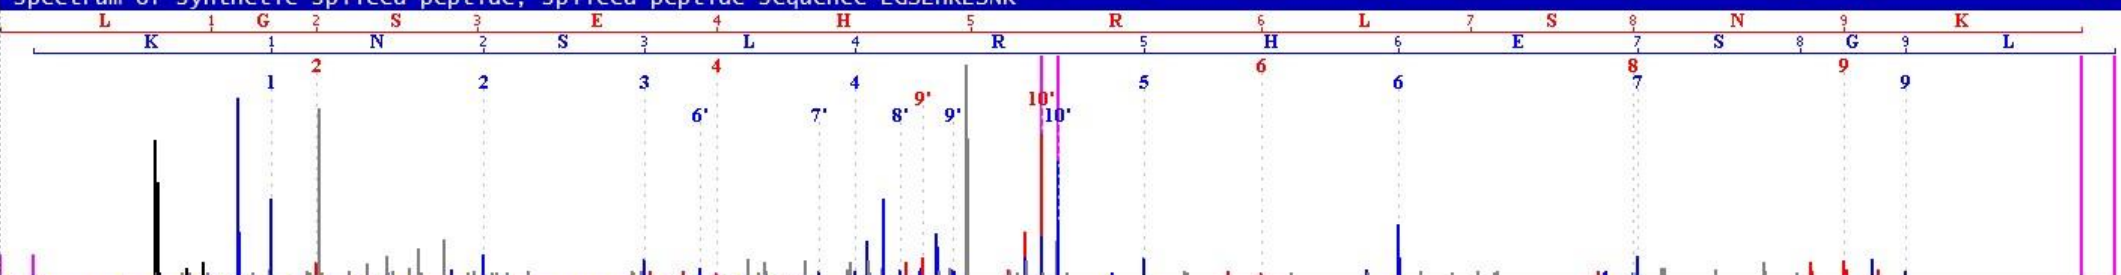

Fib spectrum 4430; alternative peptide sequence AVSEHRLSNK

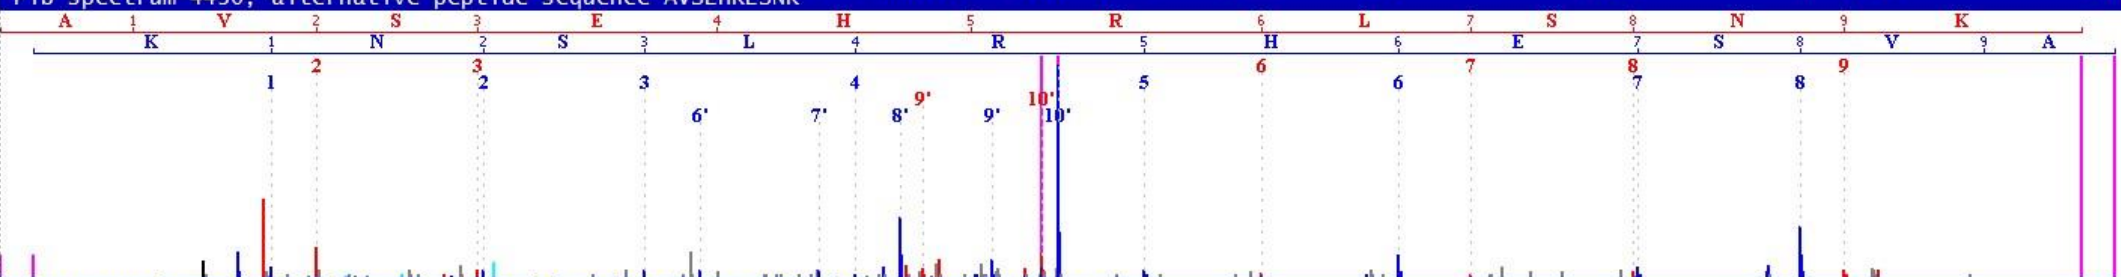

spectrum of synthetic alternative peptide; alternative peptide sequence AVSEHRLSNK

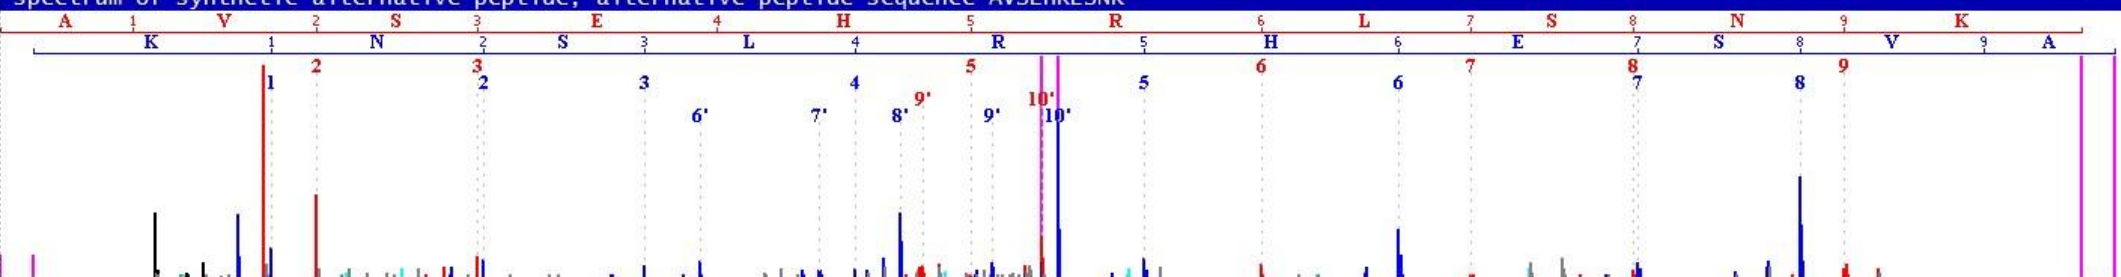

Fib spectrum 4566; spliced peptide sequence KTQTMKTPG

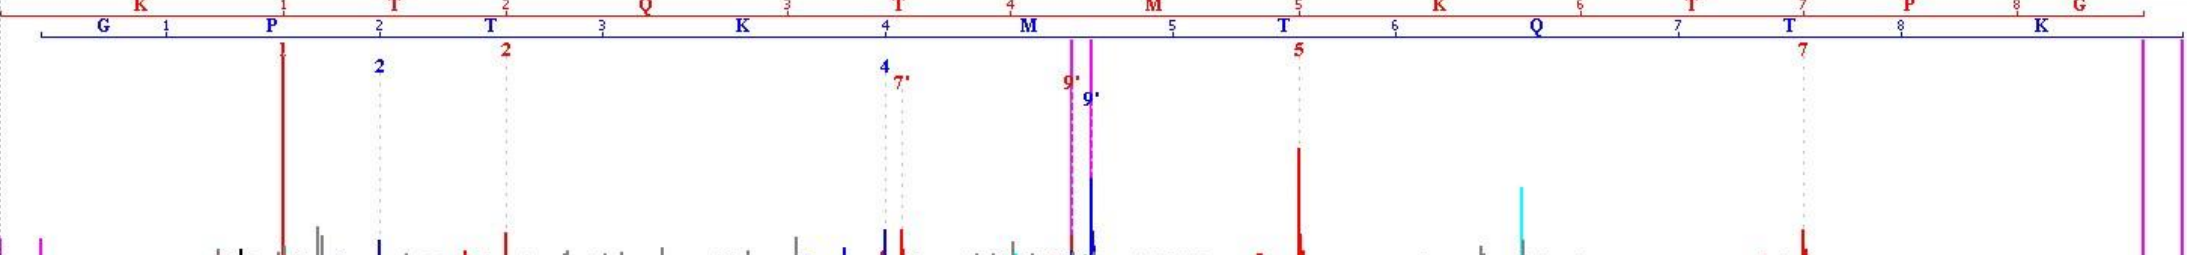

spectrum of synthetic spliced peptide; spliced peptide sequence KTQTMKTPG

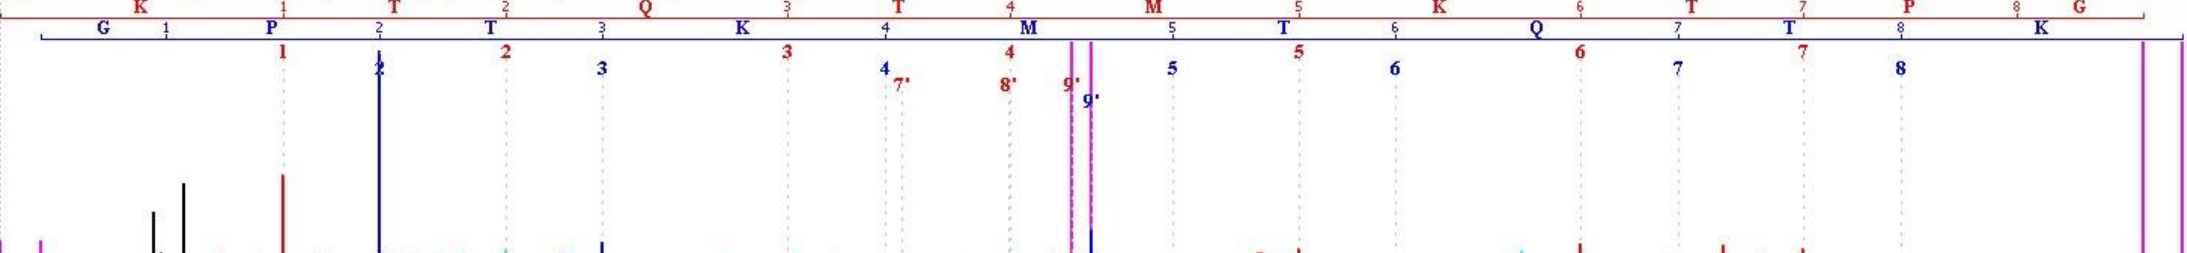

Fib spectrum 4566; alternative peptide sequence ATKTPMSQK

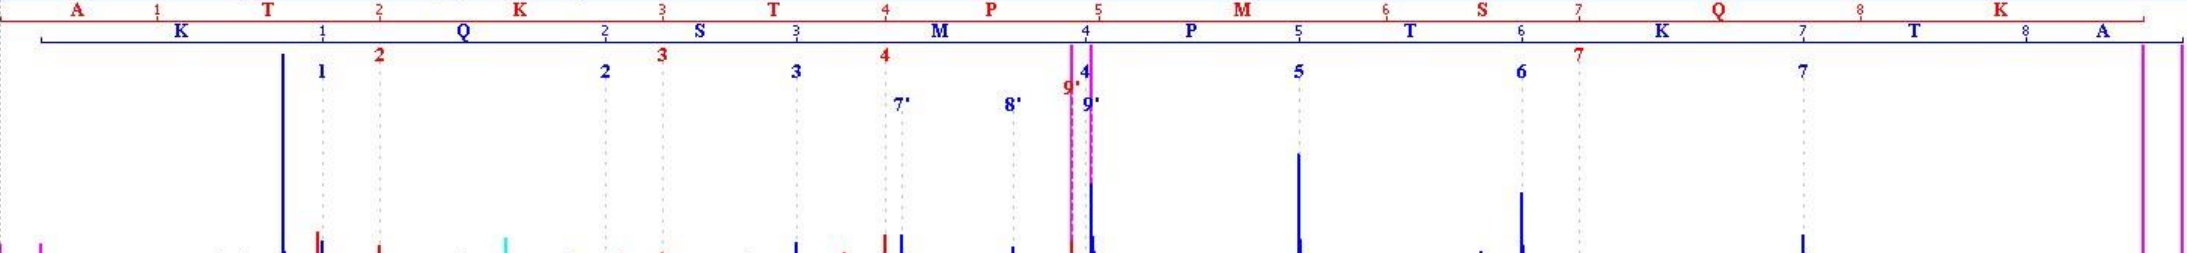

spectrum of synthetic alternative peptide; alternative peptide sequence ATKTPMSQK

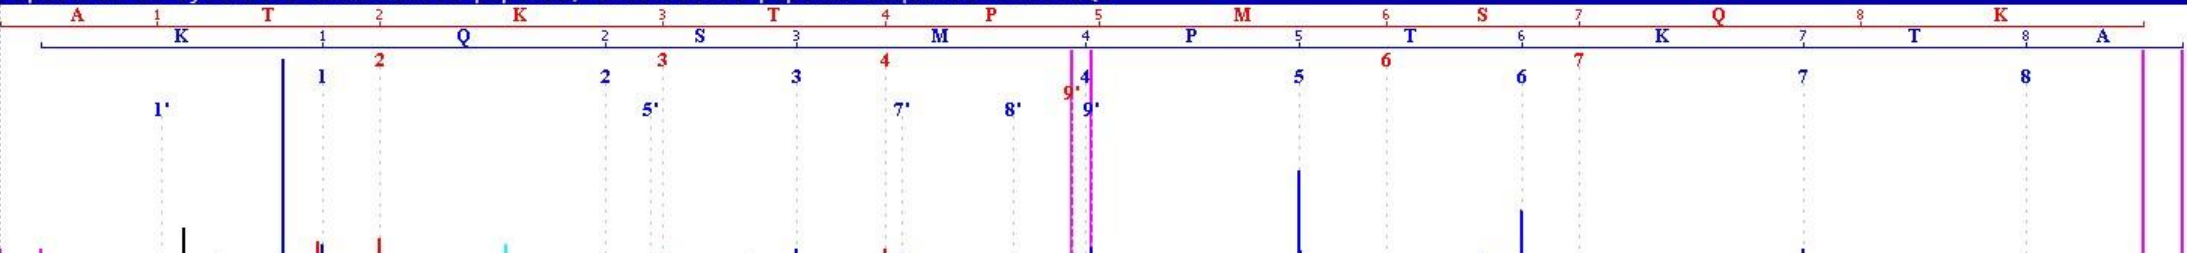



Fib spectrum 4620; spliced peptide sequence KRITKEINEK

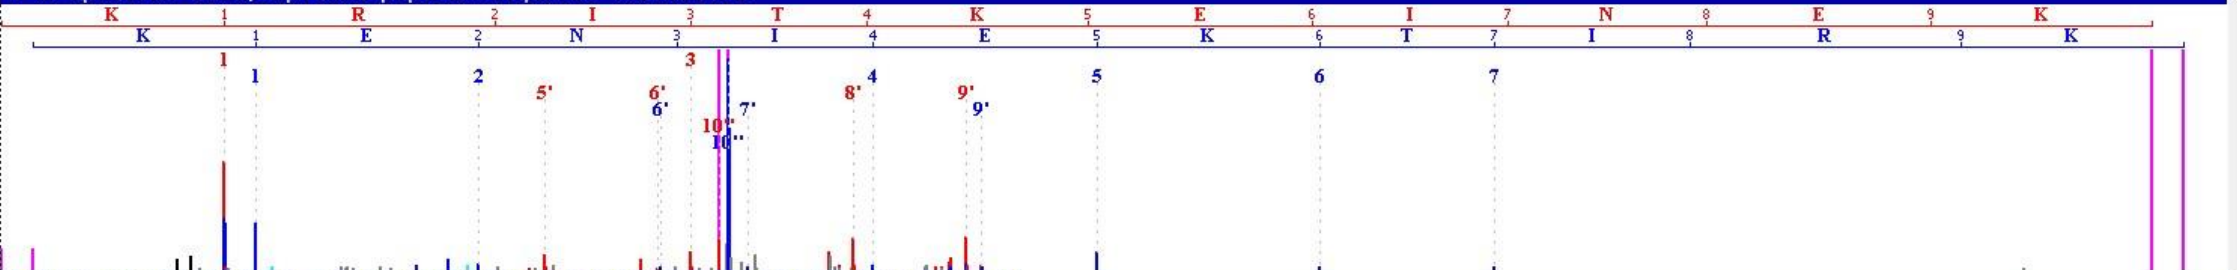

spectrum of synthetic spliced peptide; spliced peptide sequence KRITKEINEK

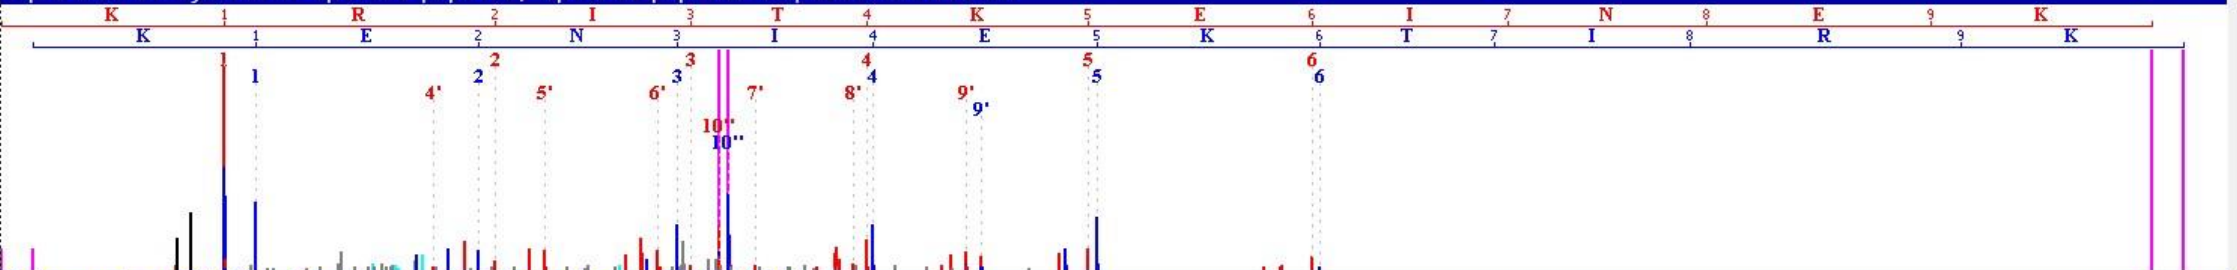

Fib spectrum 4620; alternative peptide sequence RLKTKENLEK

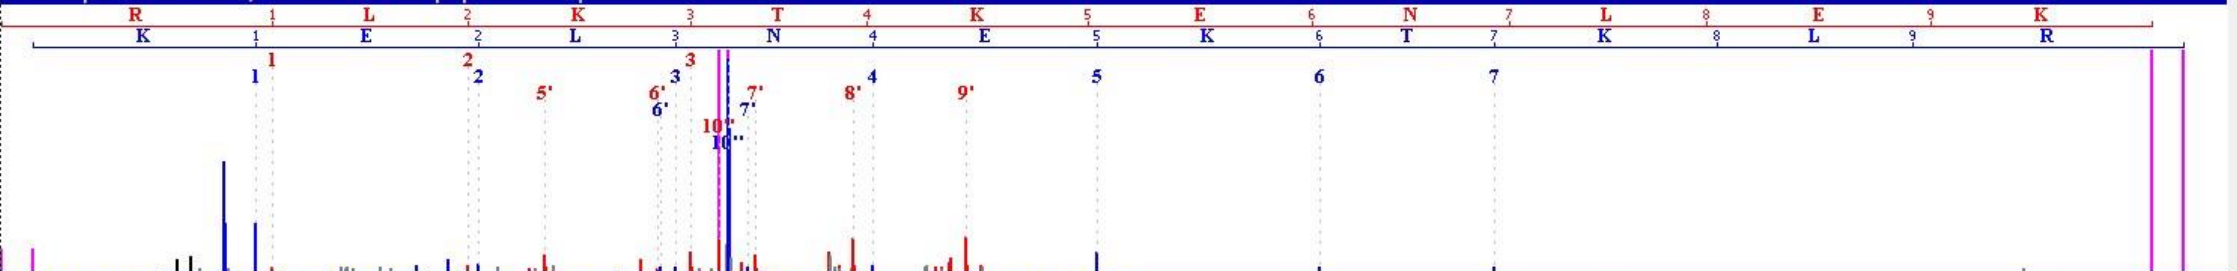

spectrum of synthetic alternative peptide; alternative peptide sequence RLKTKENLEK

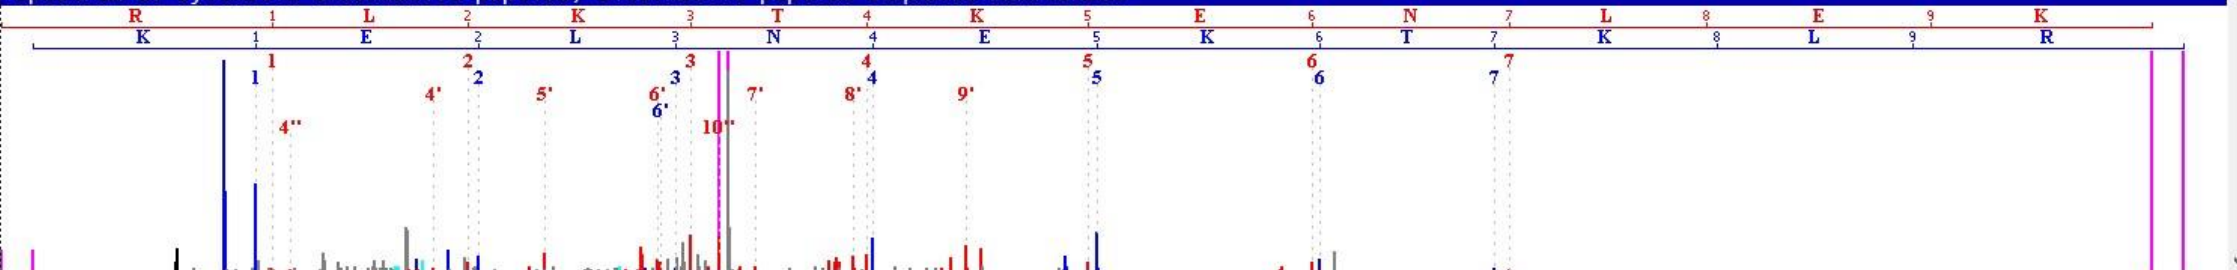

100 200 300 400 500 600 700 800 900 1000 1100 1200

Fib spectrum 4650; spliced peptide sequence KQGQPVLLKK

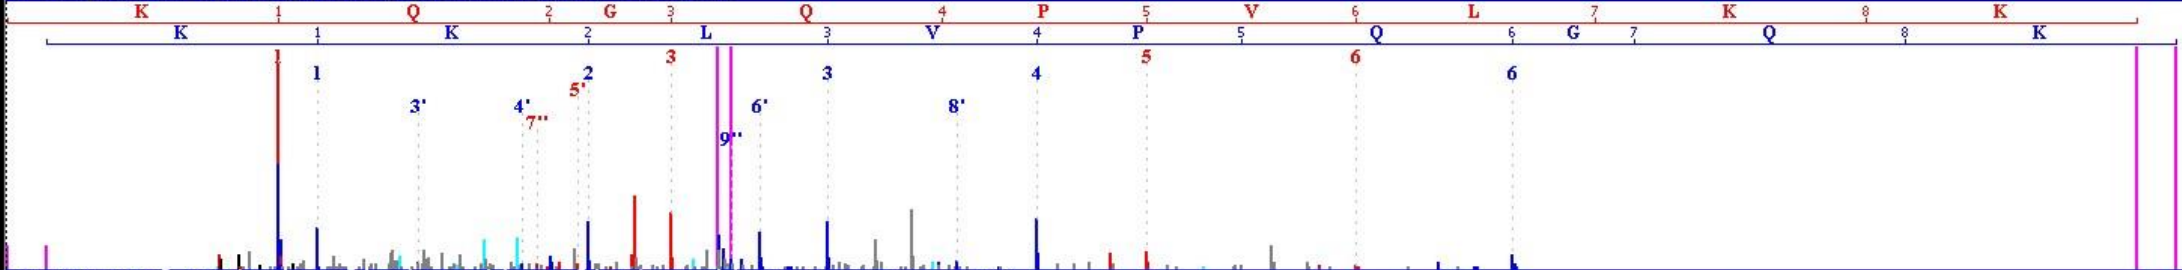

spectrum of synthetic spliced peptide; spliced peptide sequence KQGQPVLLKK

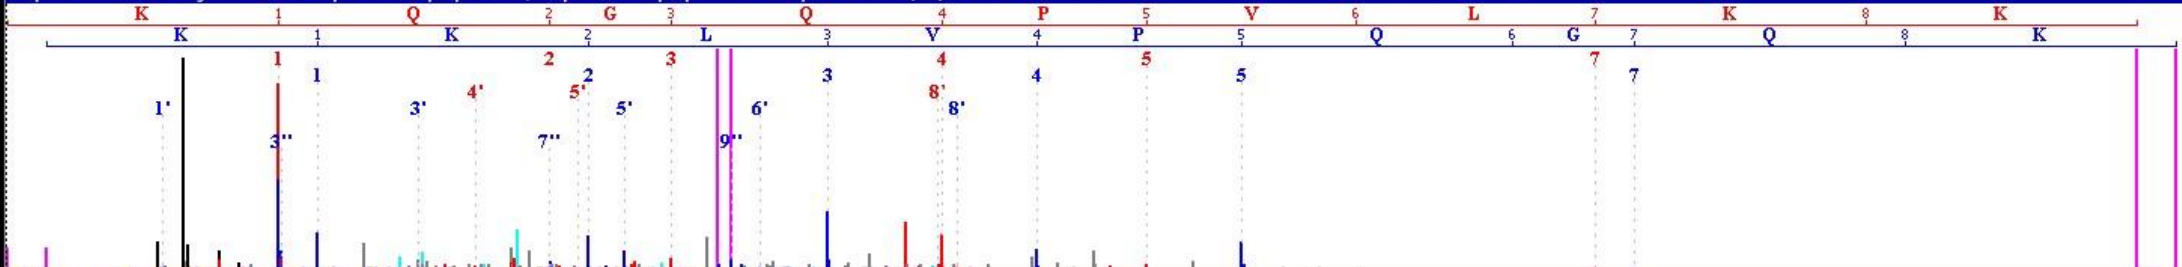

Fib spectrum 4650; alternative peptide sequence KANPQVLKK

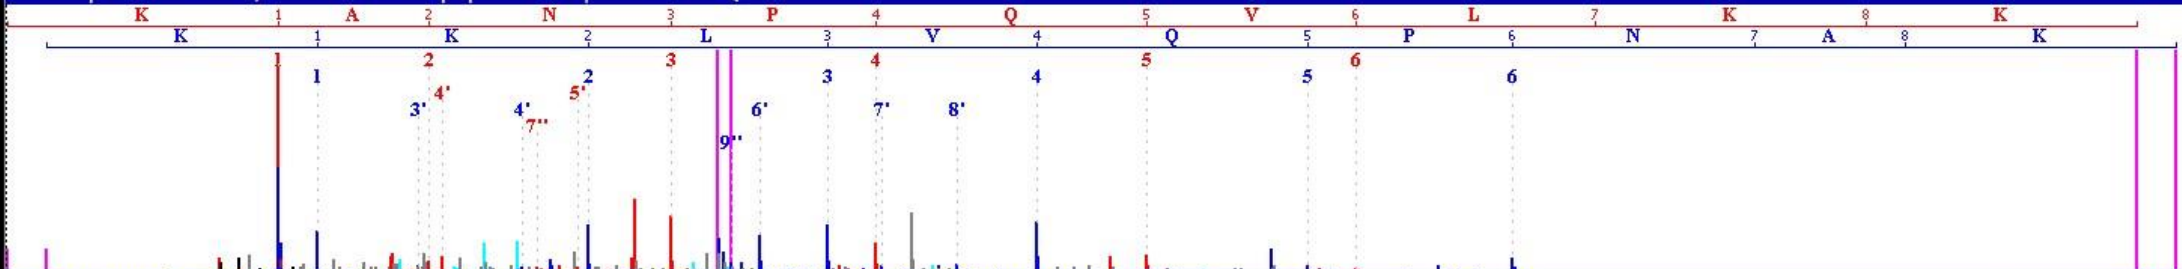

spectrum of synthetic alternative peptide; alternative peptide sequence KANPQVLKK

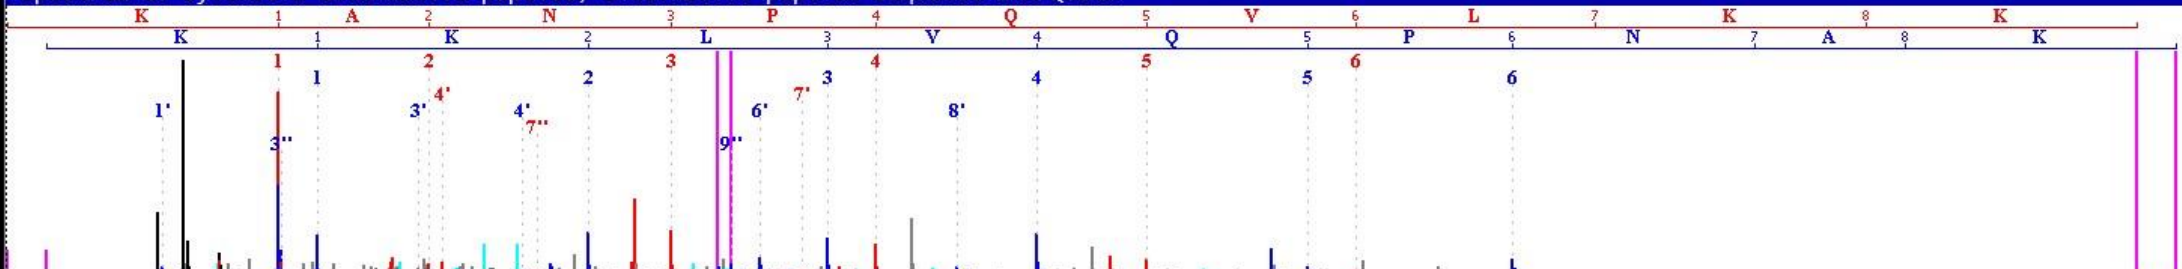

Fib spectrum 4668; spliced peptide sequence KFLGMSFNKK

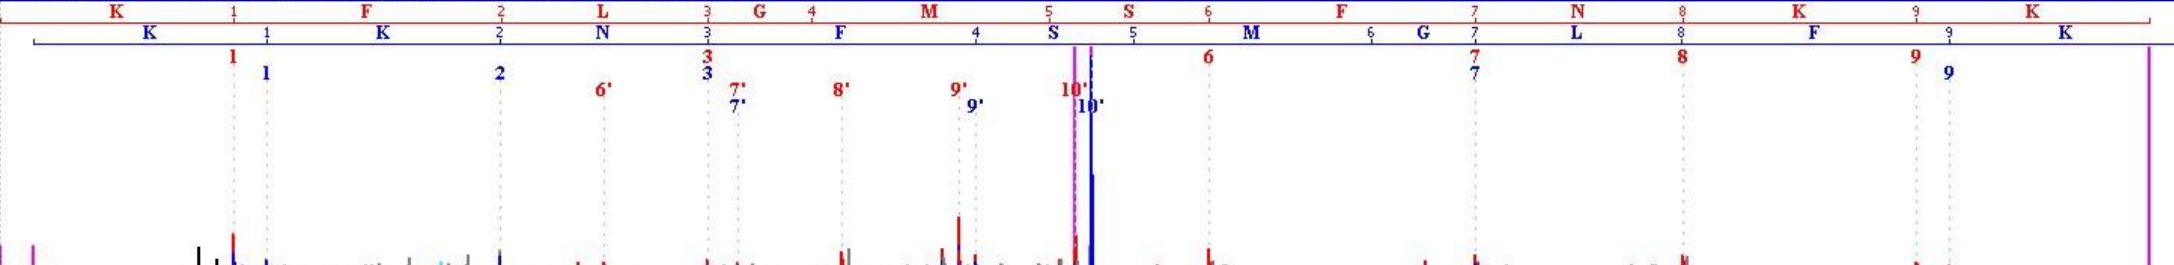

spectrum of synthetic spliced peptide; spliced peptide sequence KFLGMSFNKK

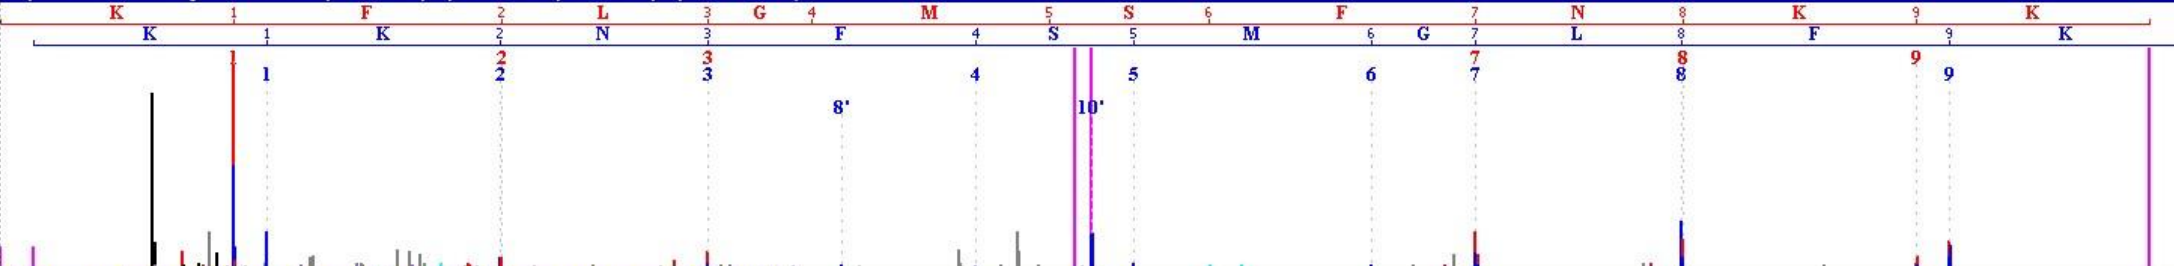

Fib spectrum 4668; alternative peptide sequence RIQEHFNKK

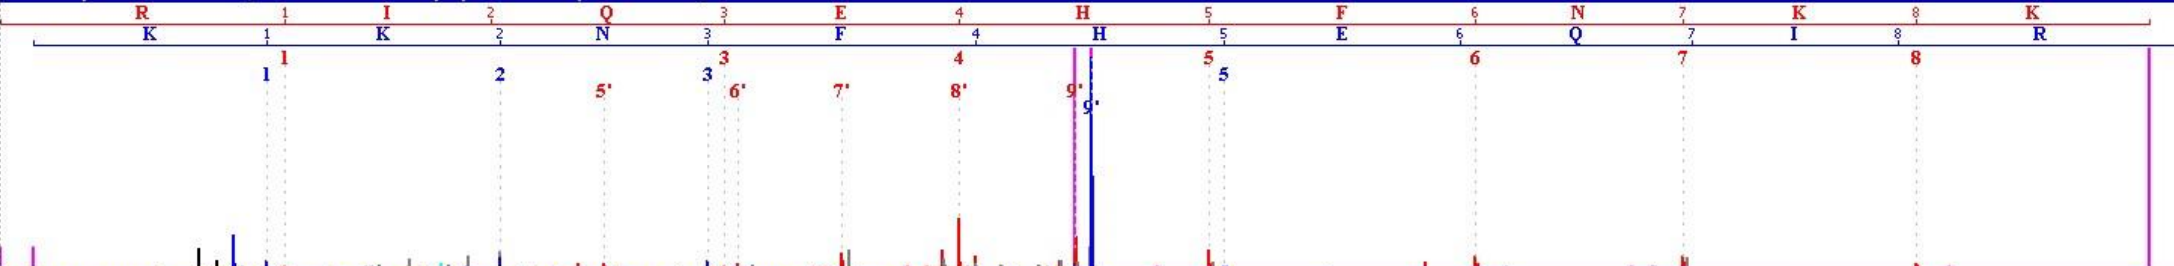

spectrum of synthetic alternative peptide; alternative peptide sequence RIQEHFNKK

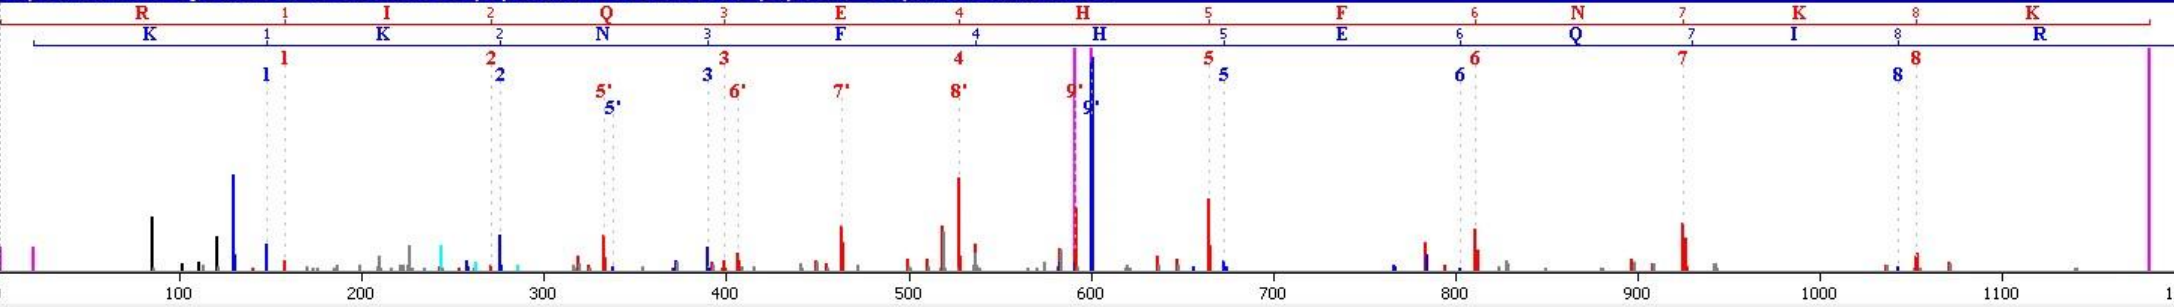

Fib spectrum 4696; spliced peptide sequence KQQIHVKKK

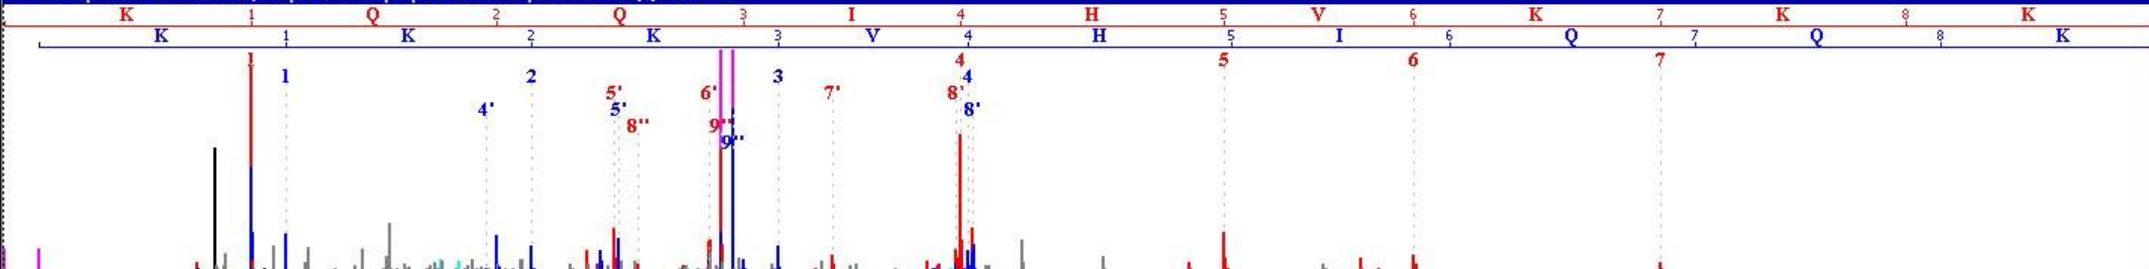

spectrum of synthetic spliced peptide; spliced peptide sequence KQQIHVKKK

Fib spectrum 4696; alternative peptide sequence RLIDHVKKK

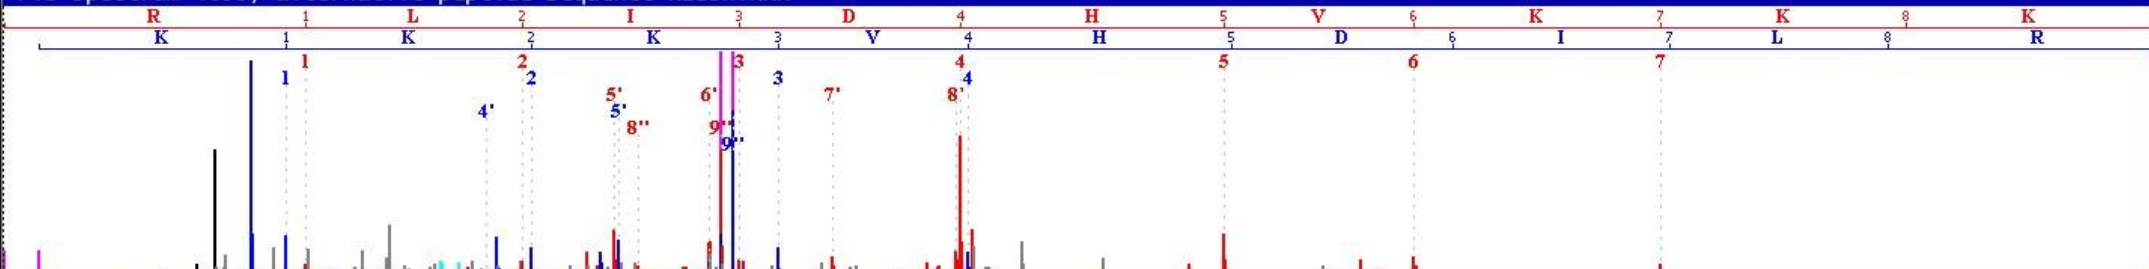

spectrum of synthetic alternative peptide; alternative peptide sequence RLIDHVKKK

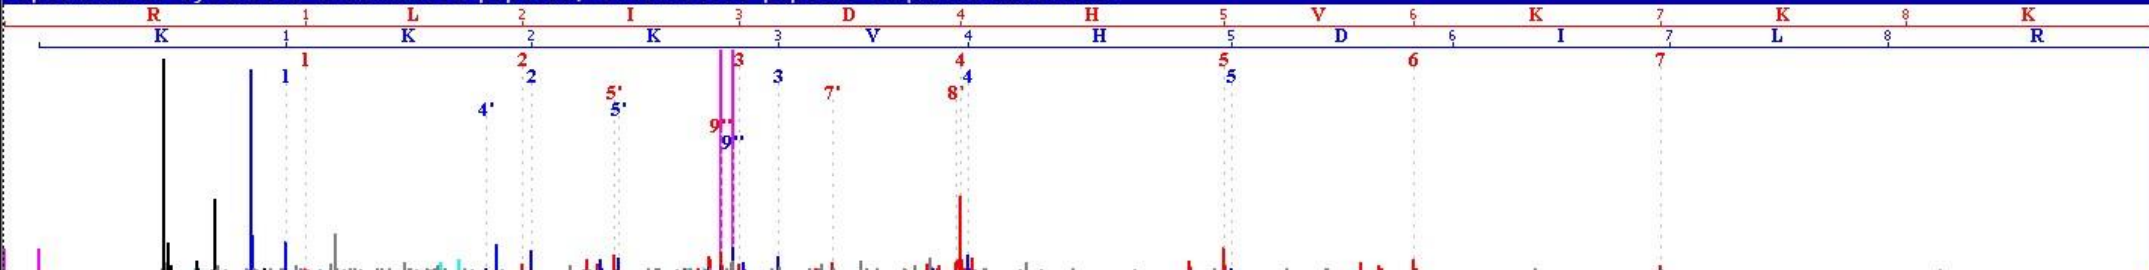

Fib spectrum 4716; spliced peptide sequence KISNACPQTK

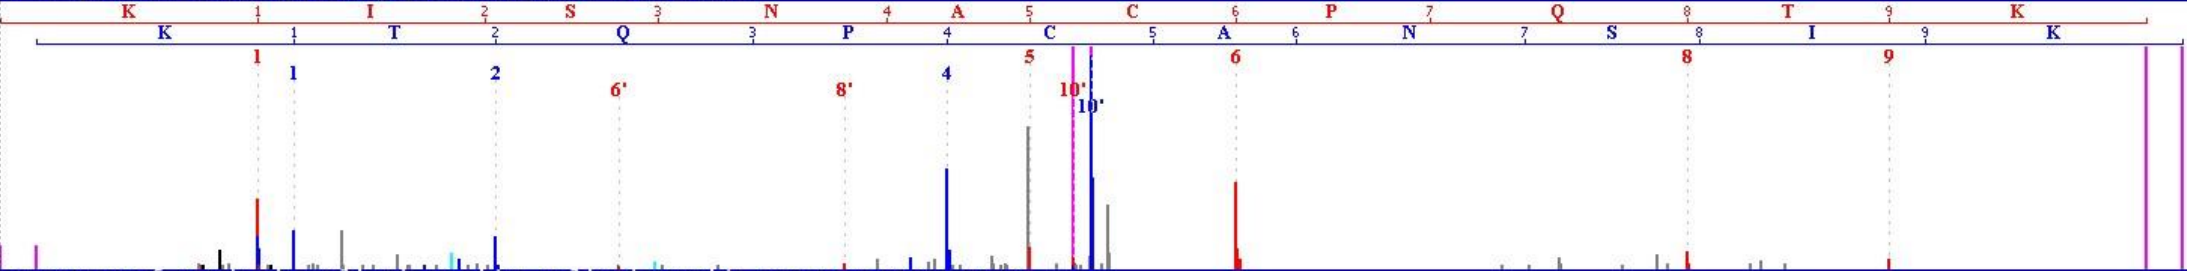

spectrum of synthetic spliced peptide; spliced peptide sequence KISNACPQTK

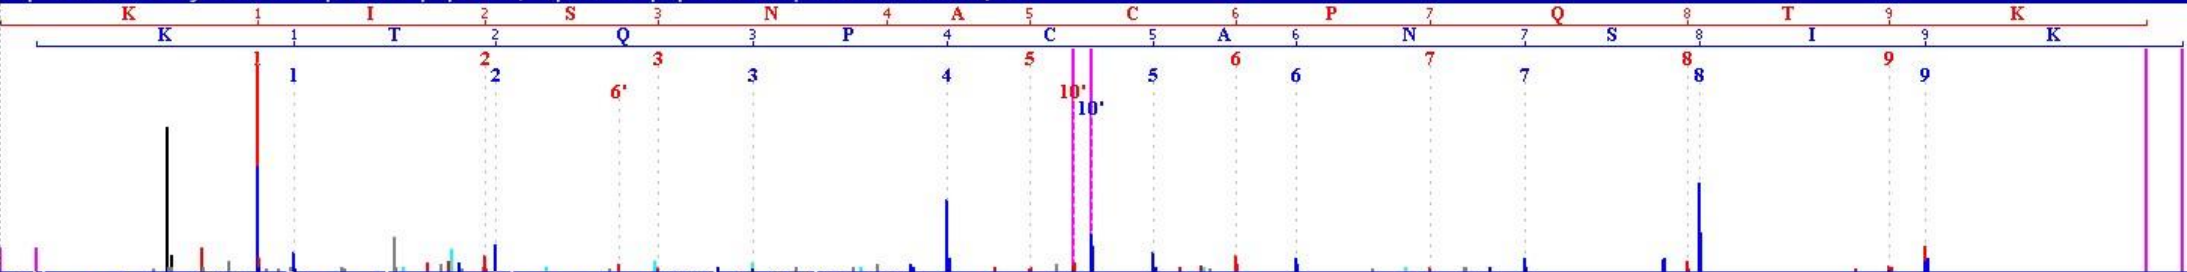

Fib spectrum 4716; alternative peptide sequence VVM(+15.995)RDPQTK

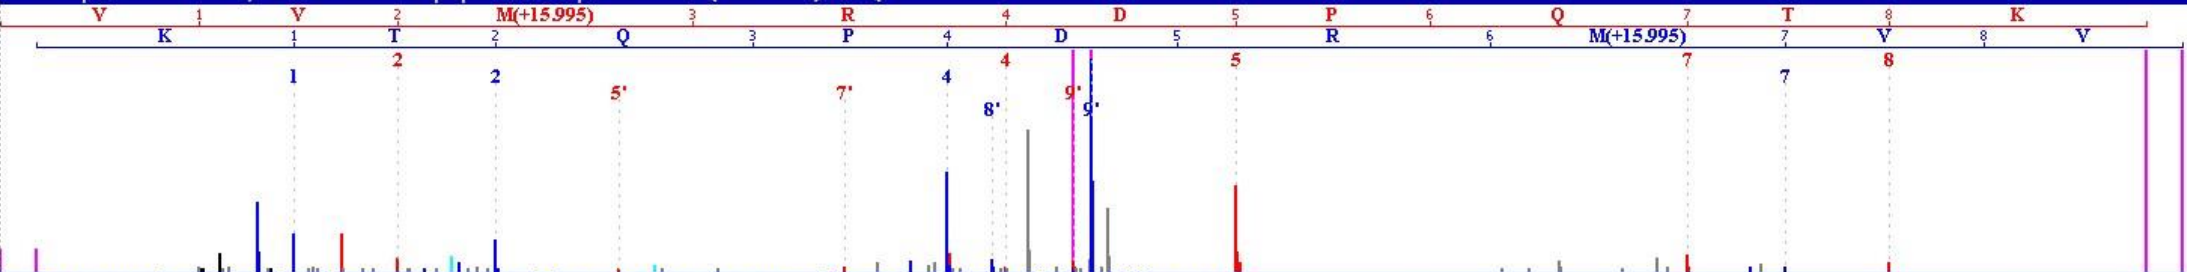

spectrum of synthetic alternative peptide; alternative peptide sequence VVM(+15.995)RDPQTK

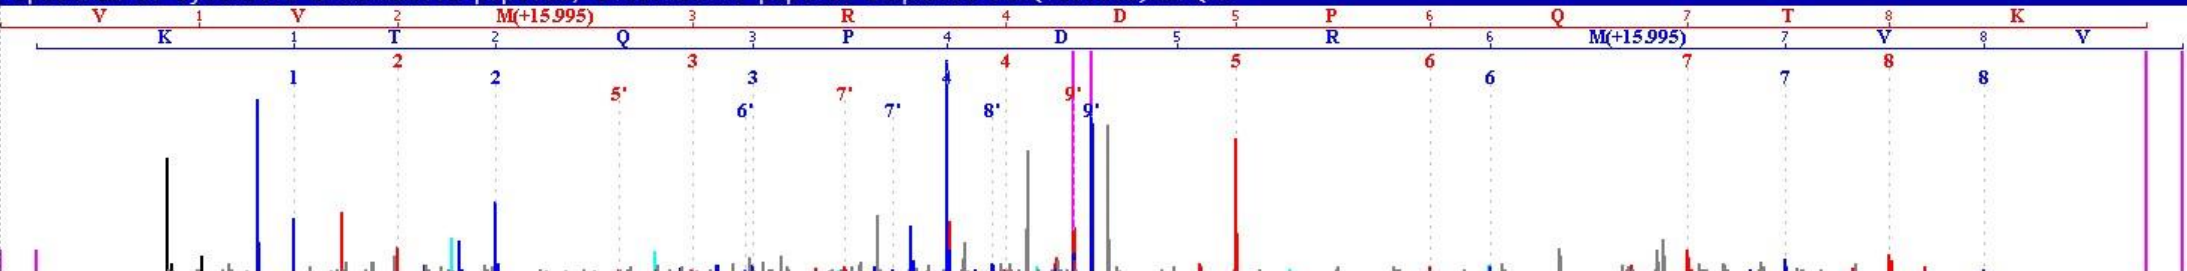

Fib spectrum 4776; spliced peptide sequence KQENPPAVQQK

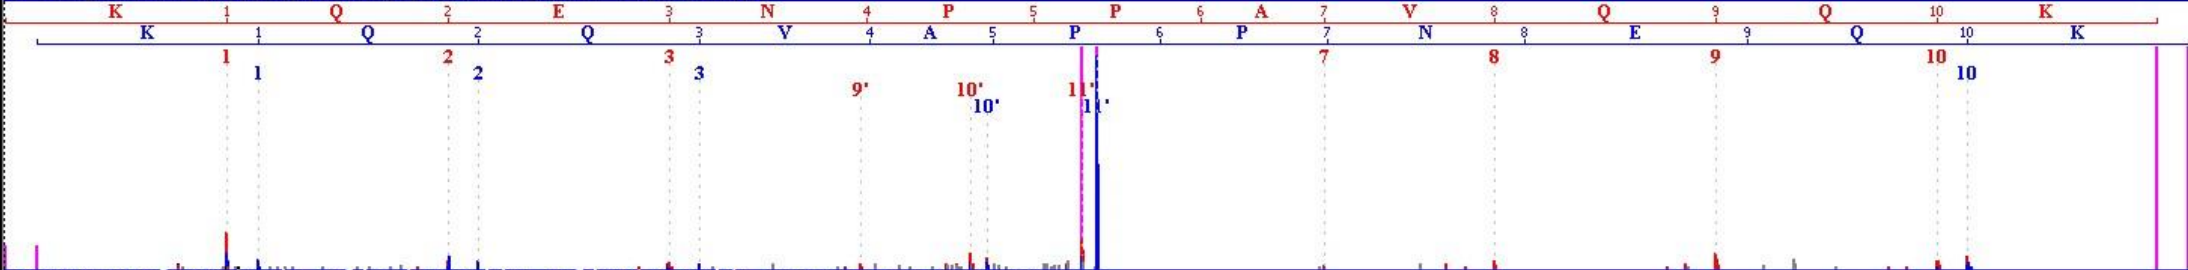

spectrum of synthetic spliced peptide; spliced peptide sequence KQENPPAVQQK

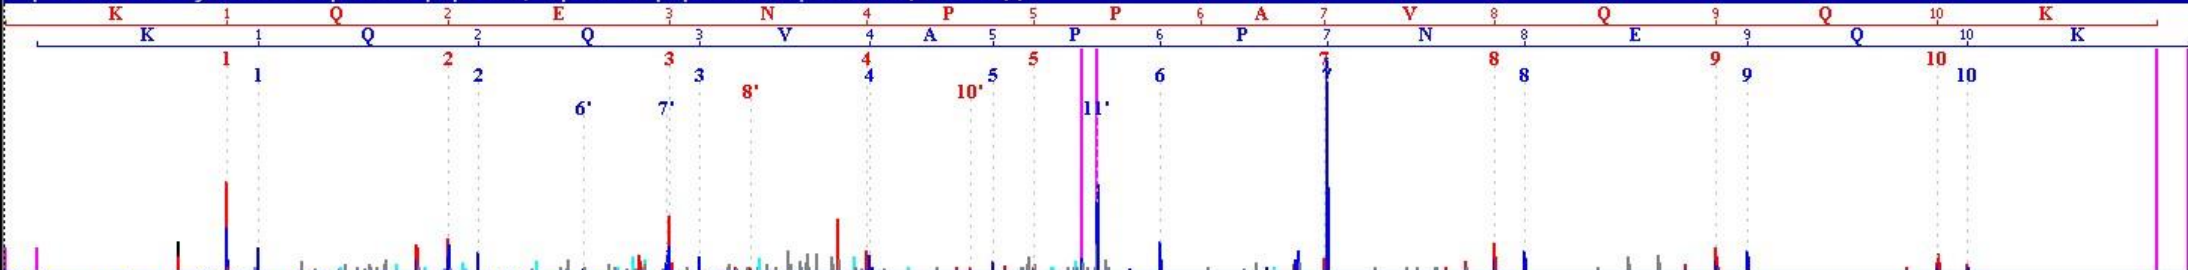

Fib spectrum 4776; alternative peptide sequence KTTDRYVQQK

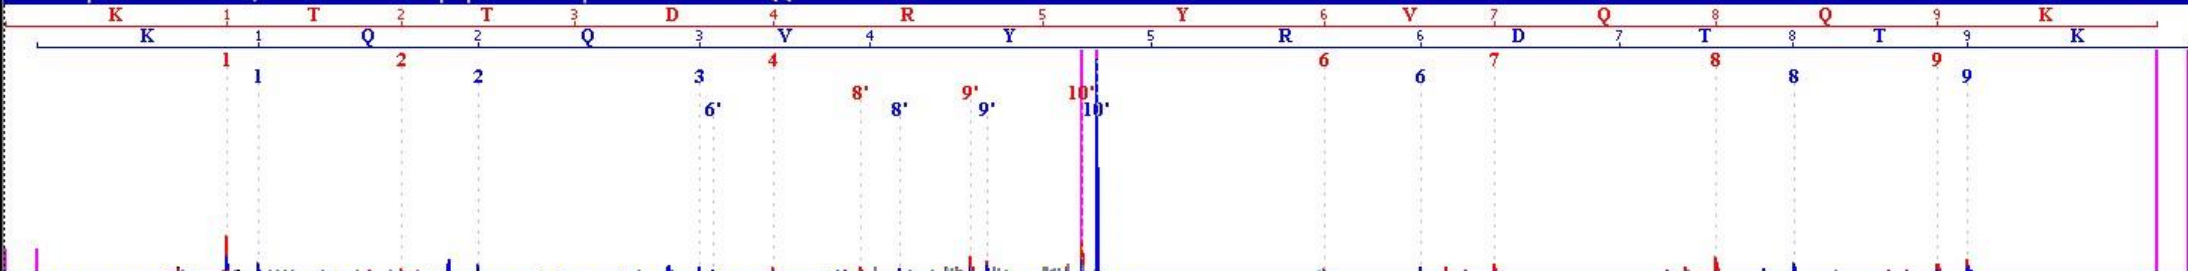

spectrum of synthetic alternative peptide; alternative peptide sequence KTTDRYVQQK

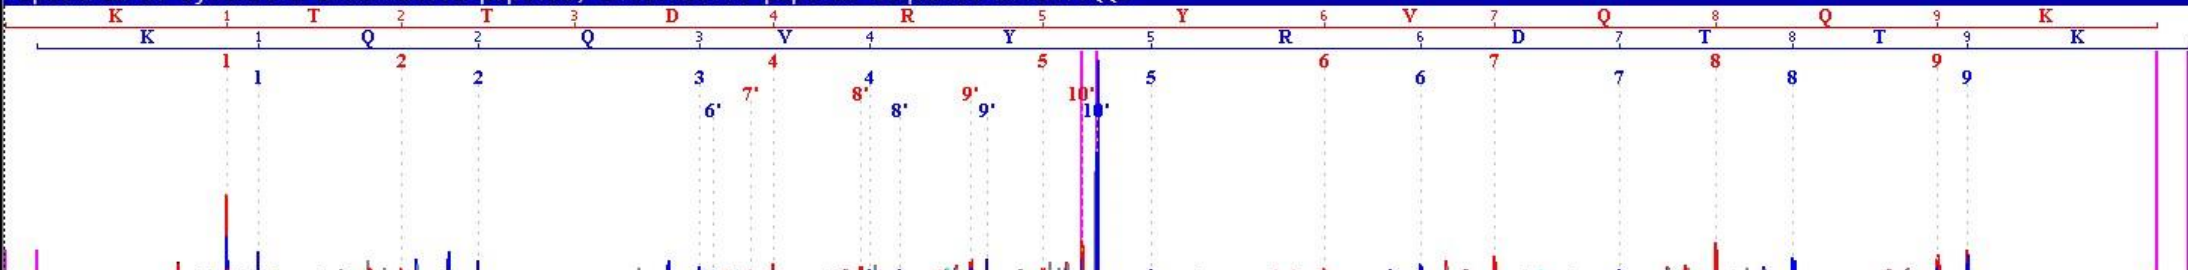

Fib spectrum 4806; spliced peptide sequence KKQKQSPG

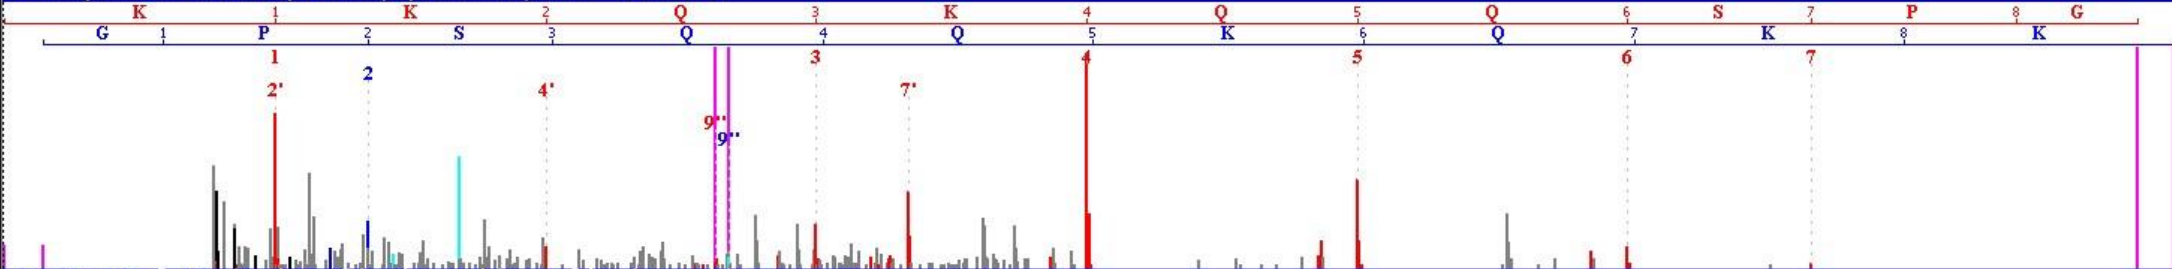

spectrum of synthetic spliced peptide; spliced peptide sequence KKQKQSPG

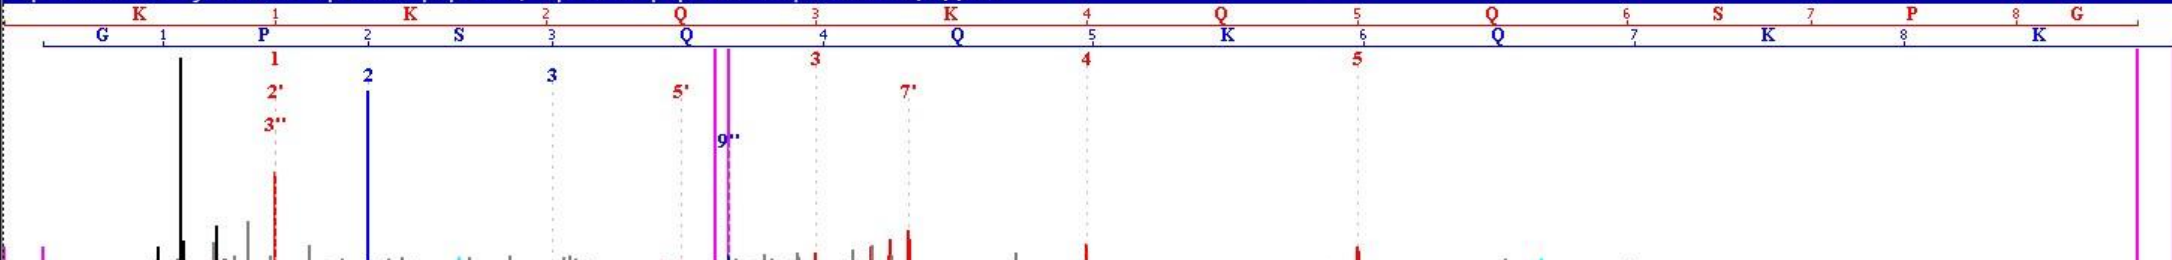

Fib spectrum 4806; alternative peptide sequence ATSQQPLRK

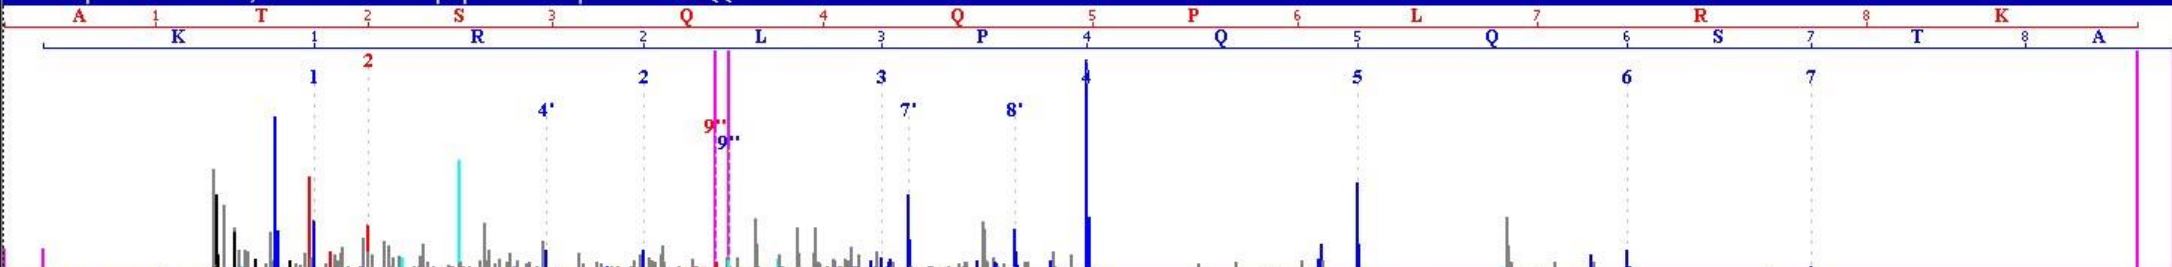

spectrum of synthetic alternative peptide; alternative peptide sequence ATSQQPLRK

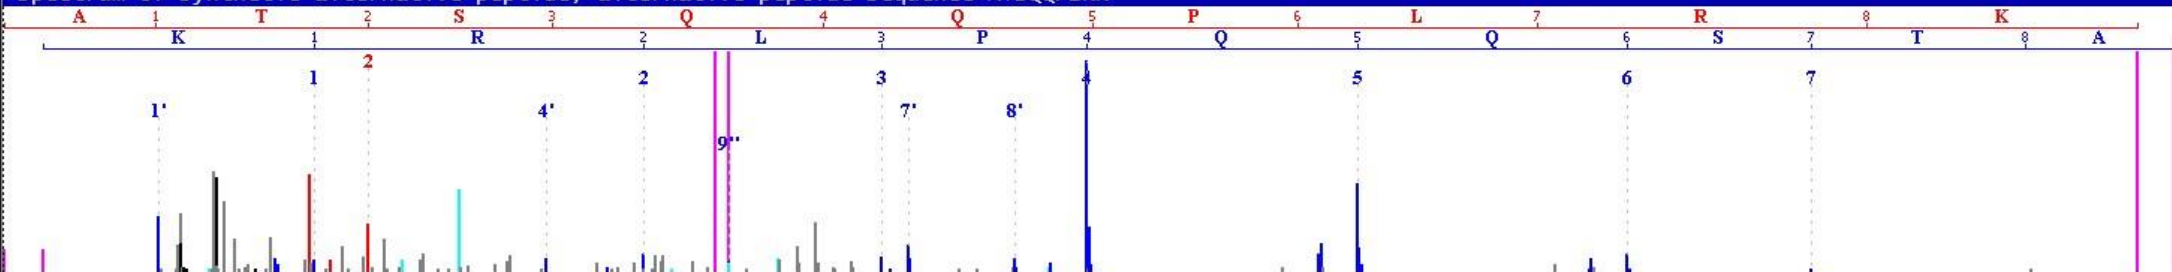

100 200 300 400 500 600 700 800 900 1000

Fib spectrum 4897; spliced peptide sequence HGPLTATGTK

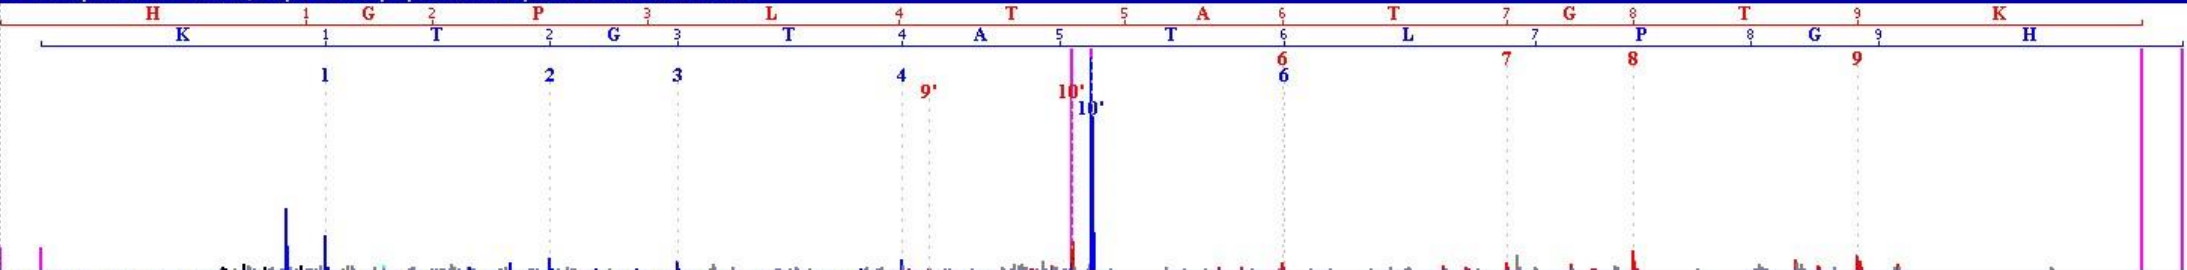

spectrum of synthetic spliced peptide; spliced peptide sequence HGPLTATGTK

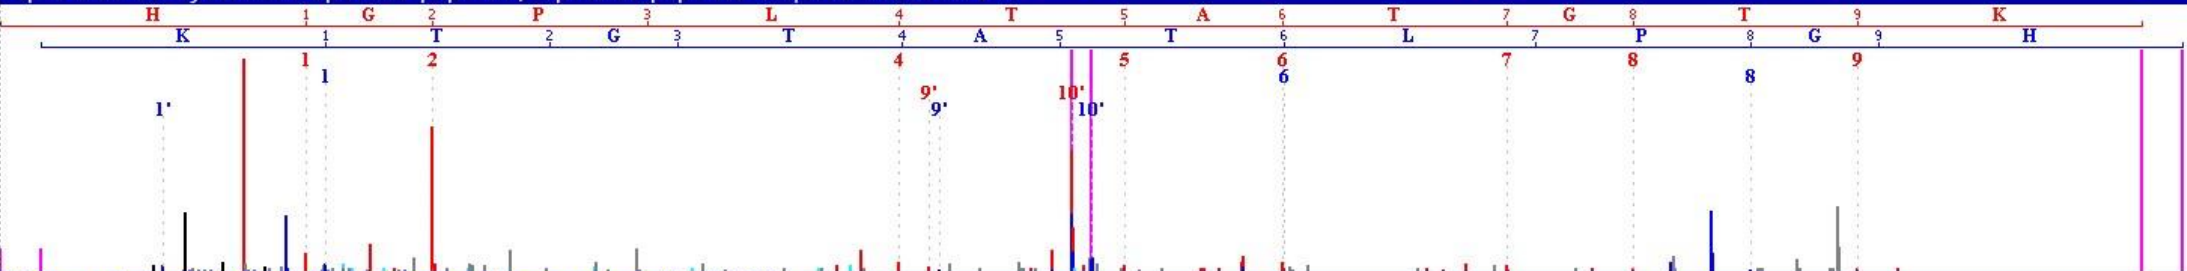

Fib spectrum 4897; alternative peptide sequence RYVGTGTR

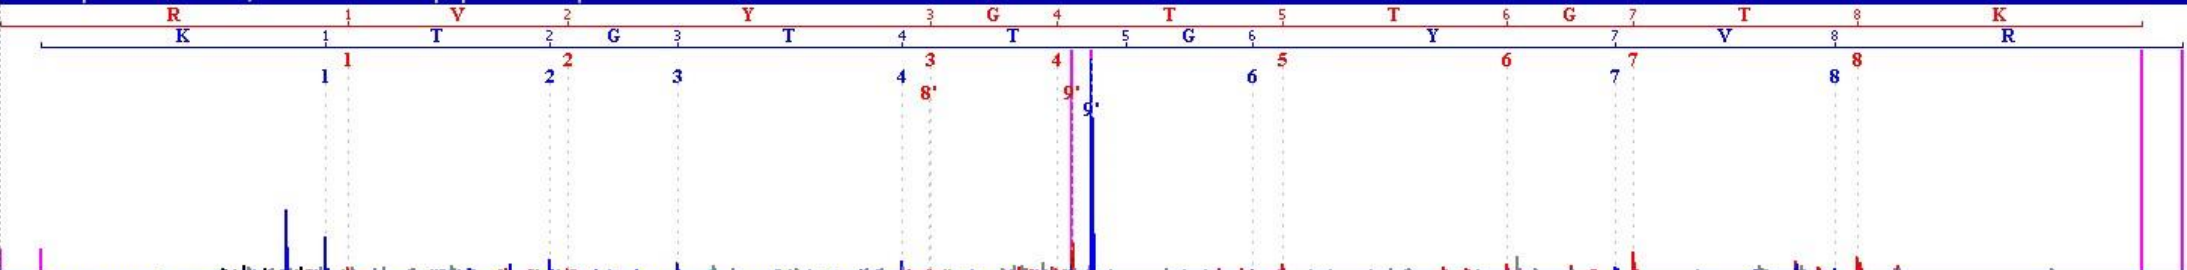

spectrum of synthetic alternative peptide; alternative peptide sequence RYVGTGTR

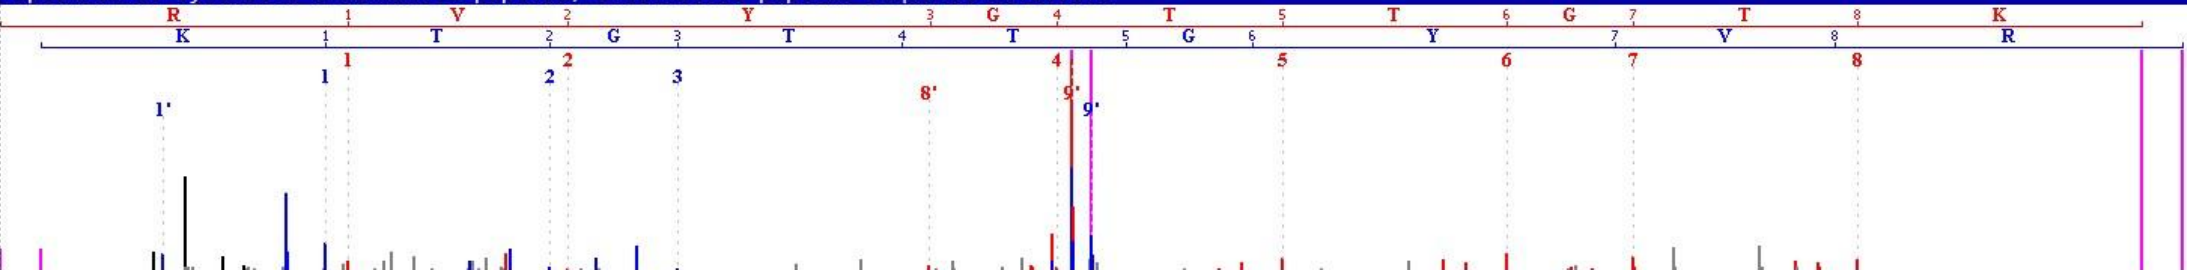



Fib spectrum 4969; spliced peptide sequence VLSTESPASK

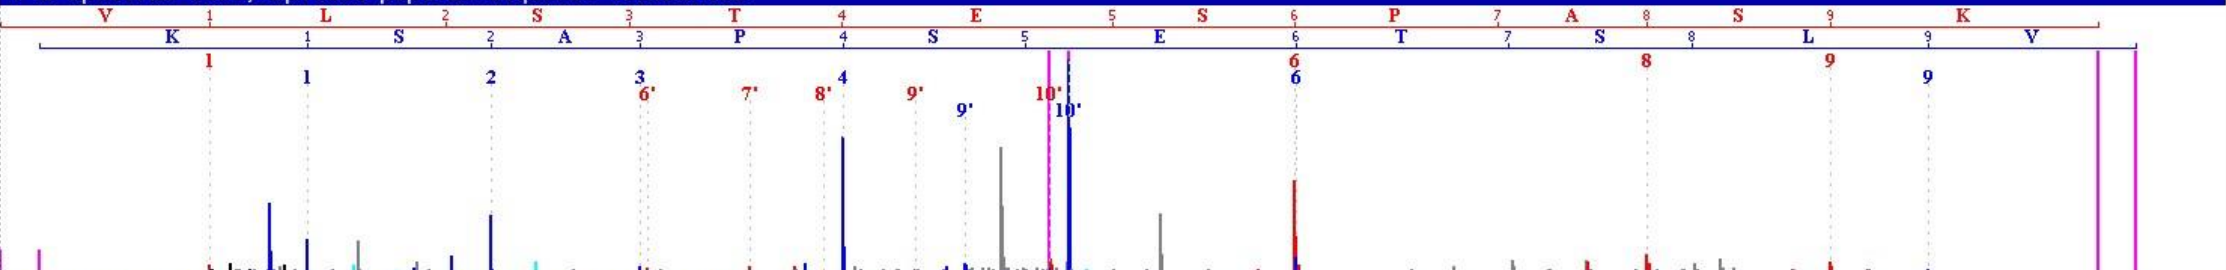

spectrum of synthetic spliced peptide; spliced peptide sequence VLSTESPASK

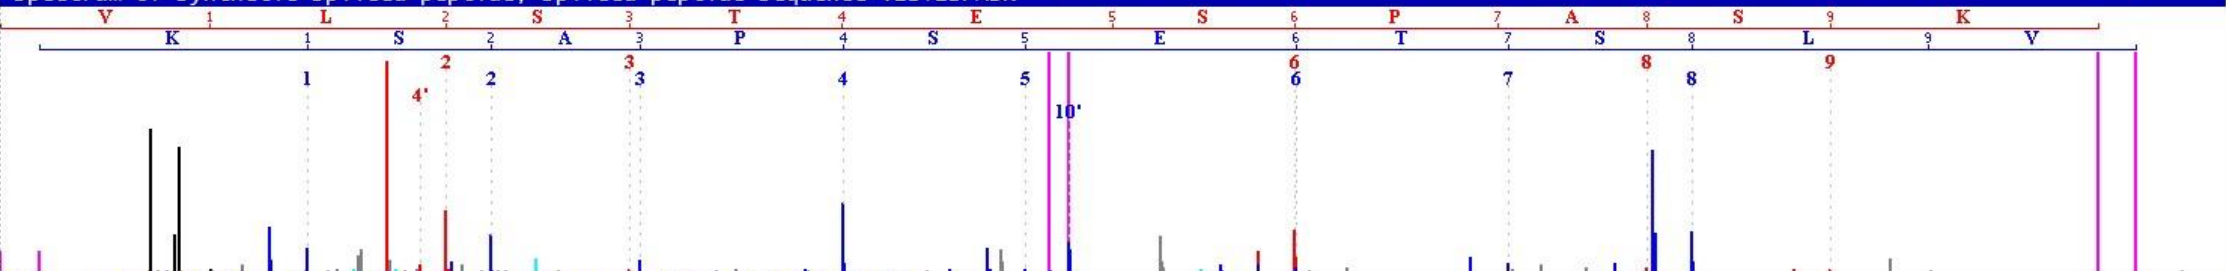

Fib spectrum 4969; alternative peptide sequence VVM(+15.995)RDPASK

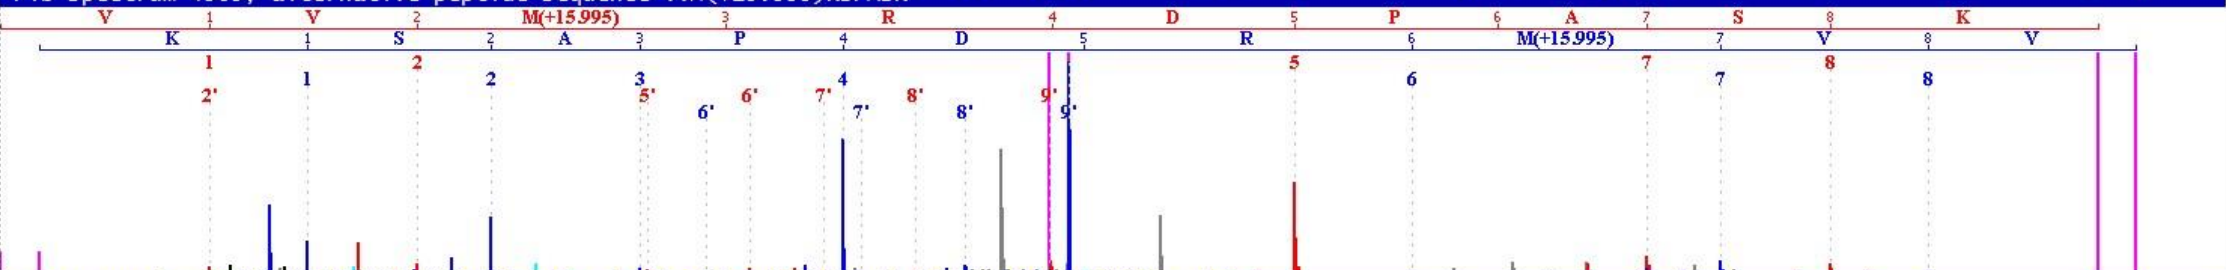

spectrum of synthetic alternative peptide; alternative peptide sequence VVM(+15.995)RDPASK

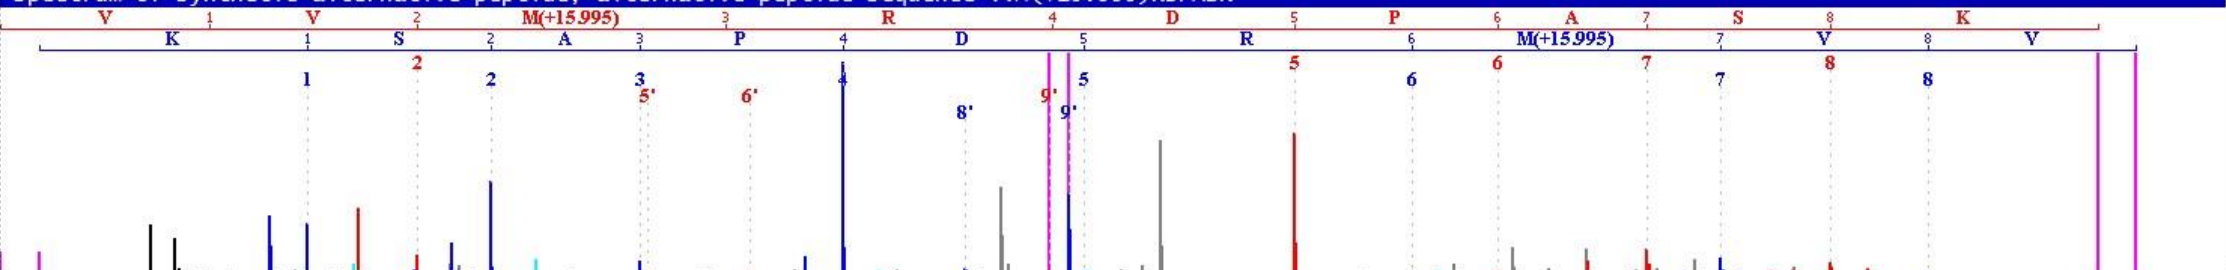

Fib spectrum 4996; spliced peptide sequence RVTGALQKK

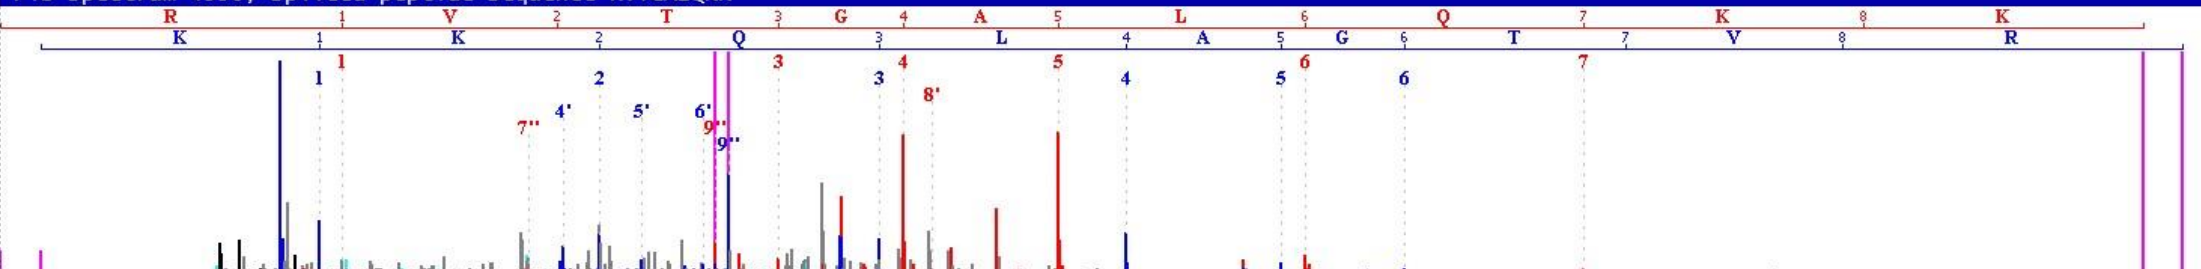

spectrum of synthetic spliced peptide; spliced peptide sequence RVTGALQKK

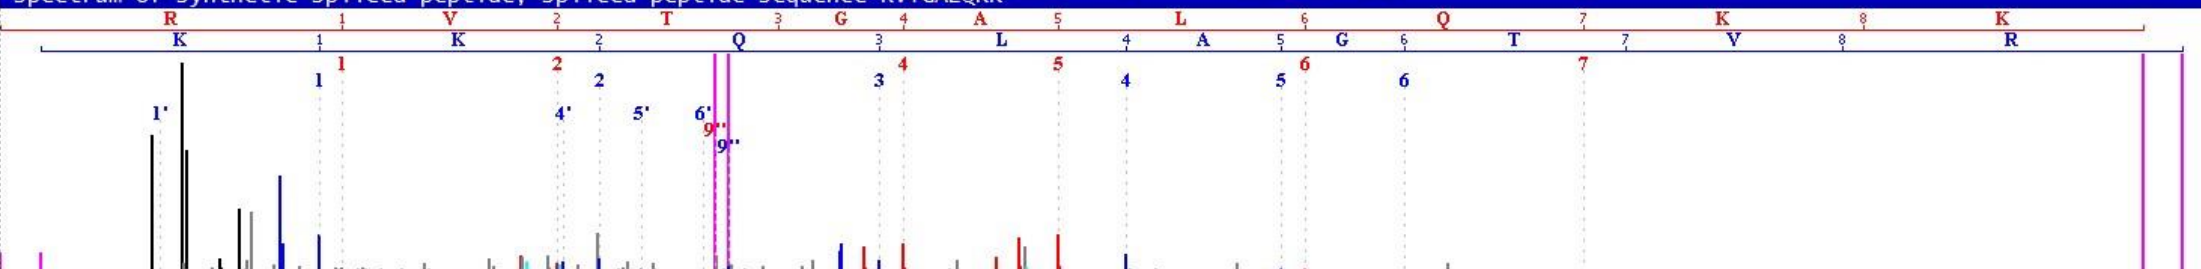

Fib spectrum 4996; alternative peptide sequence RLSGALQKK

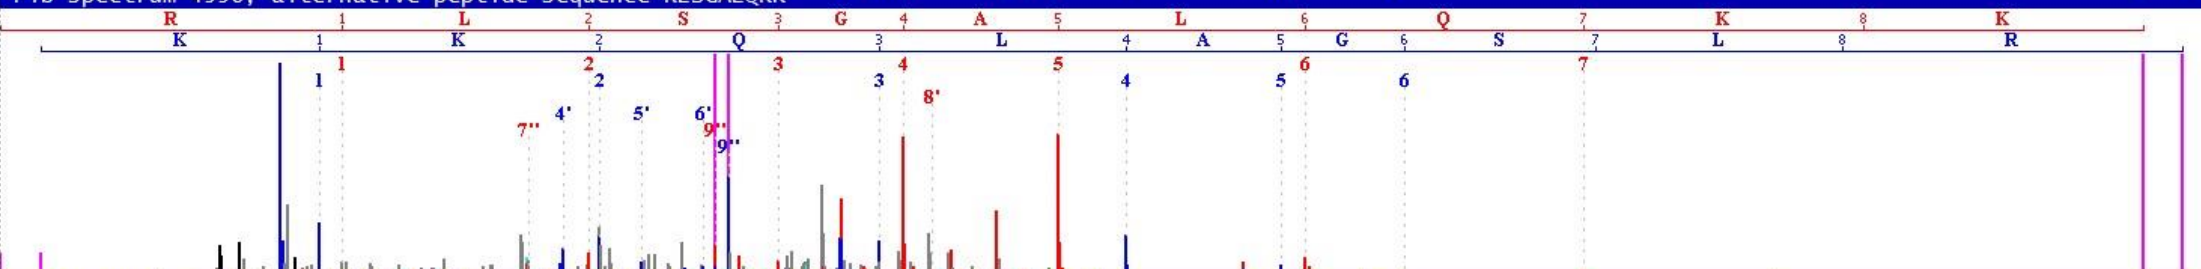

spectrum of synthetic alternative peptide; alternative peptide sequence RLSGALQKK

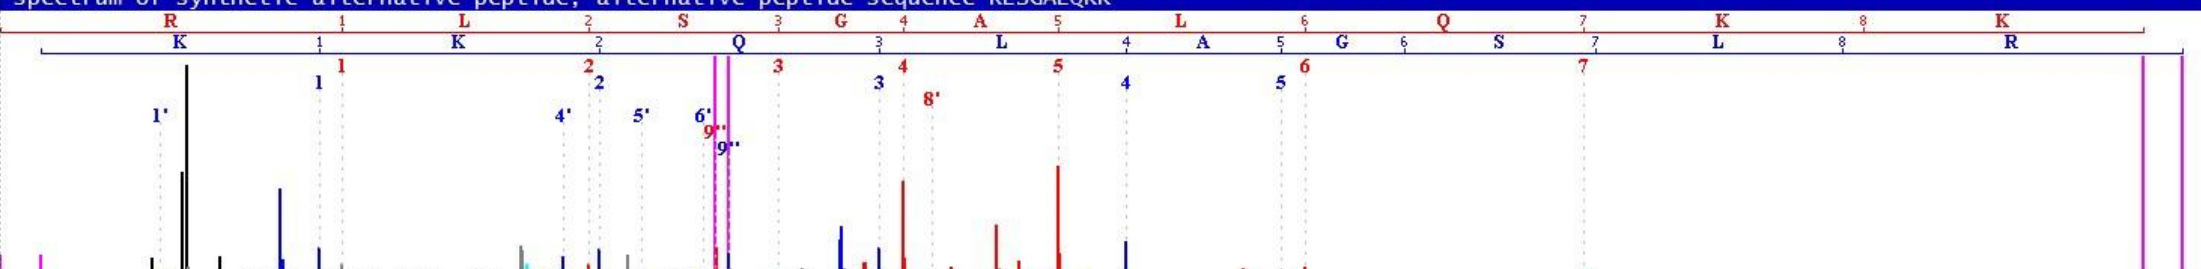

Fib spectrum 4031; spliced peptide sequence LENKKGKSL

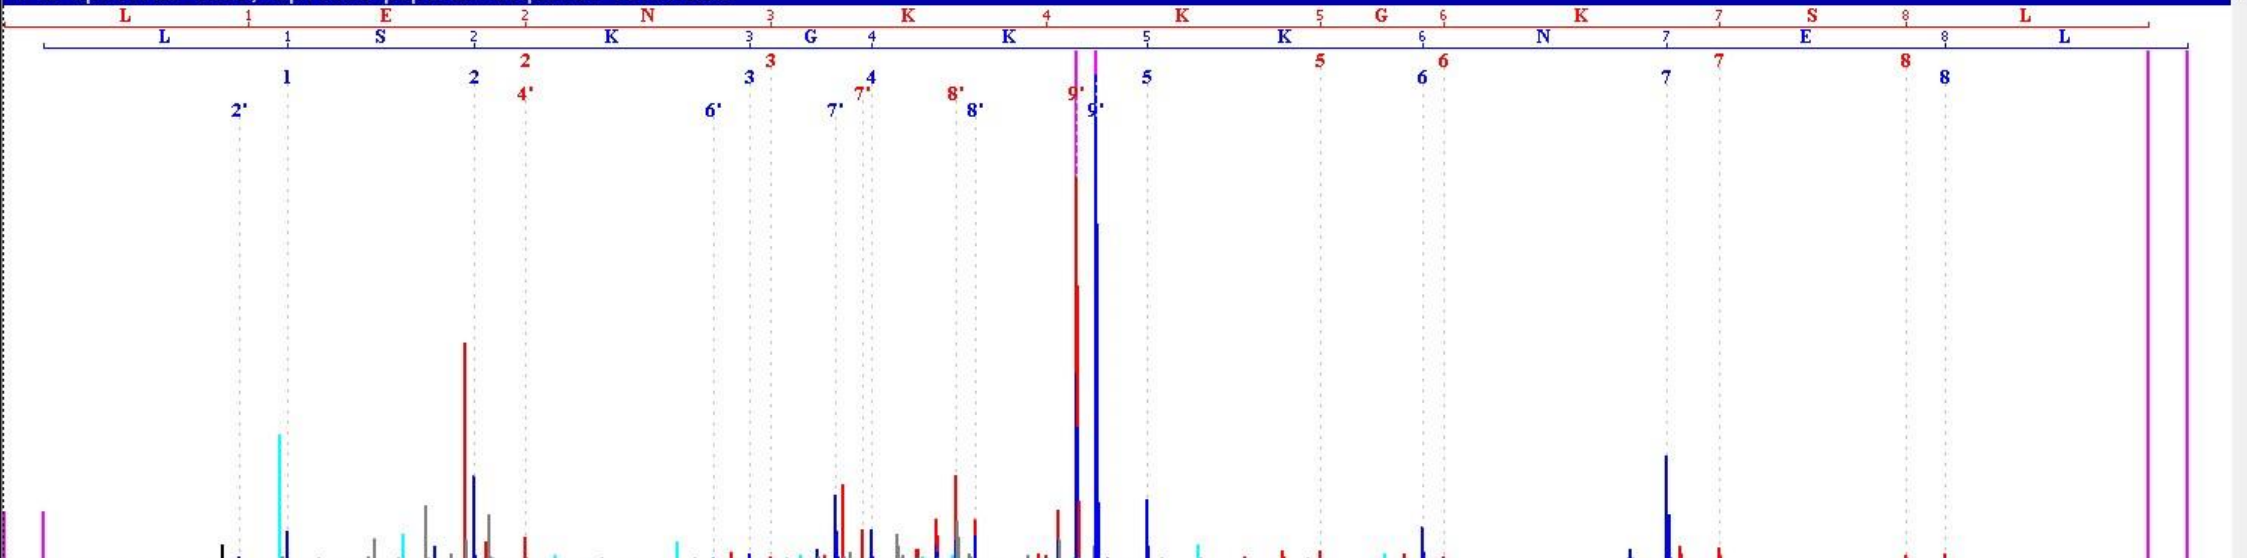

spectrum of synthetic spliced peptide; spliced peptide sequence LENKKGKSL

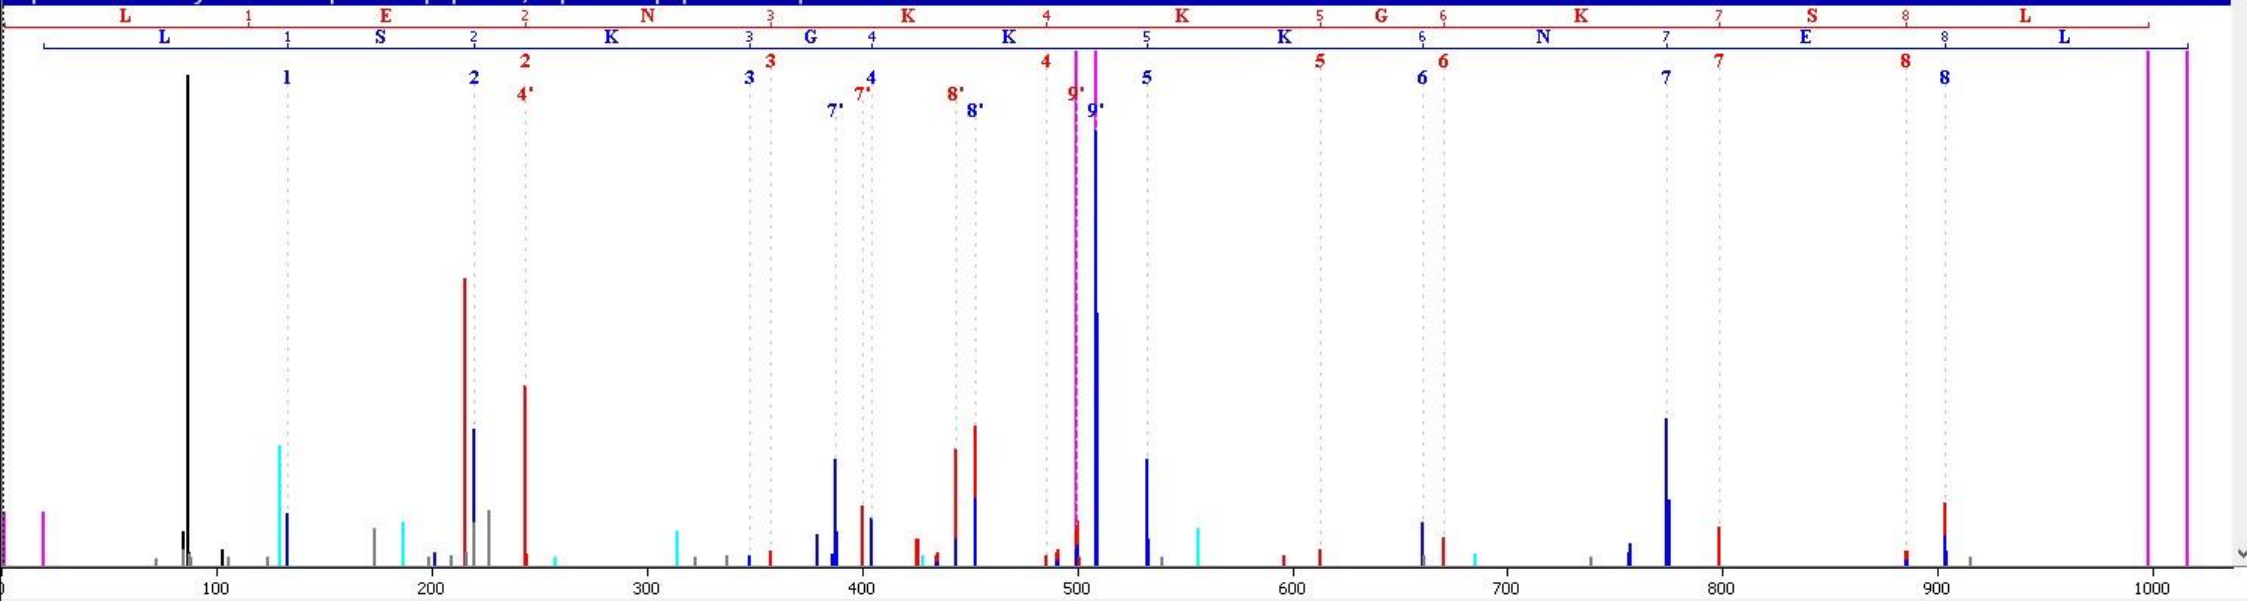

Fib spectrum 4783; spliced peptide sequence KRIPLPTKK

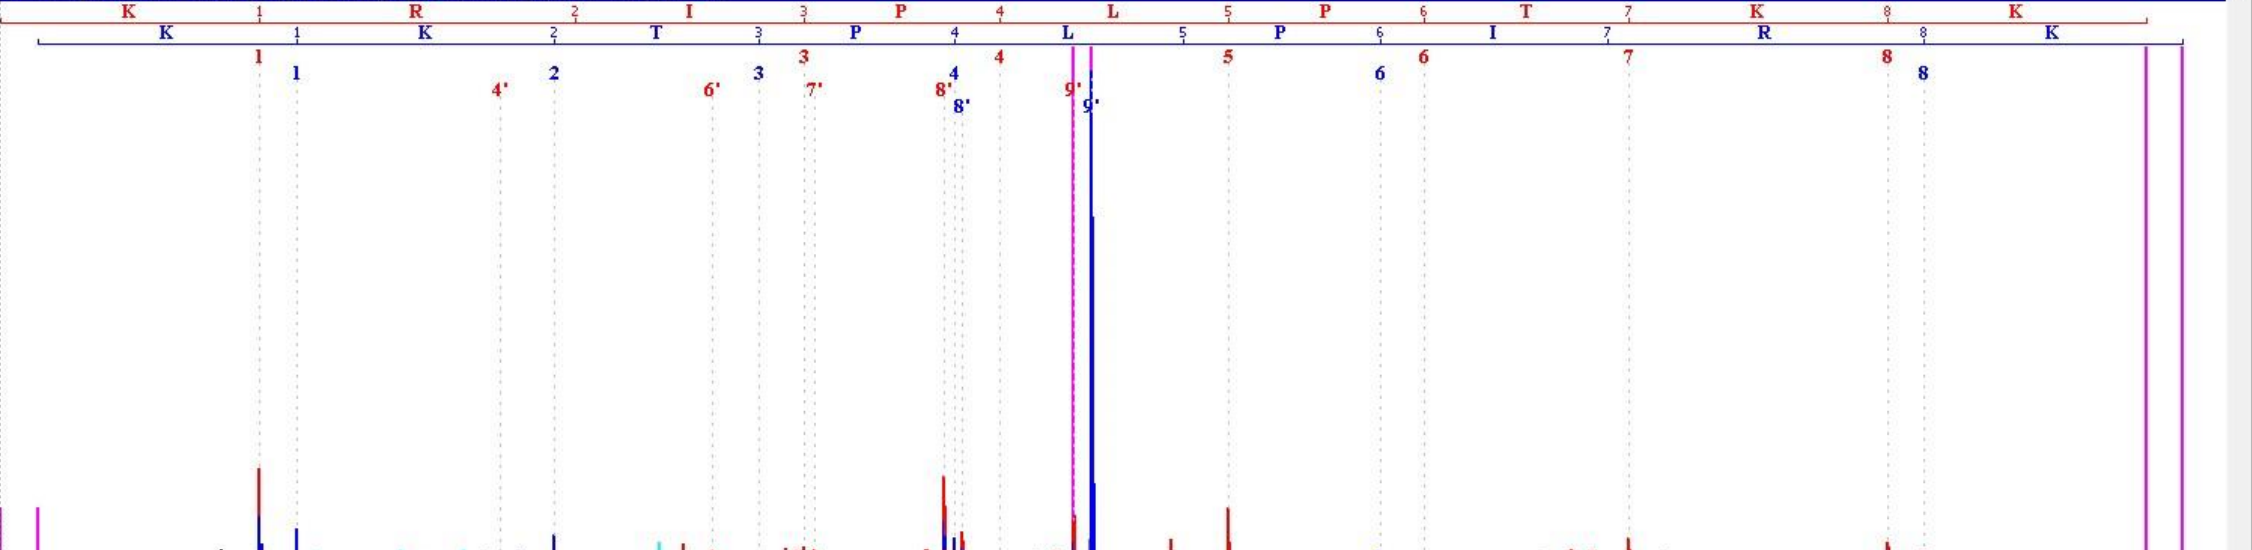

spectrum of synthetic spliced peptide; spliced peptide sequence KRIPLPTKK

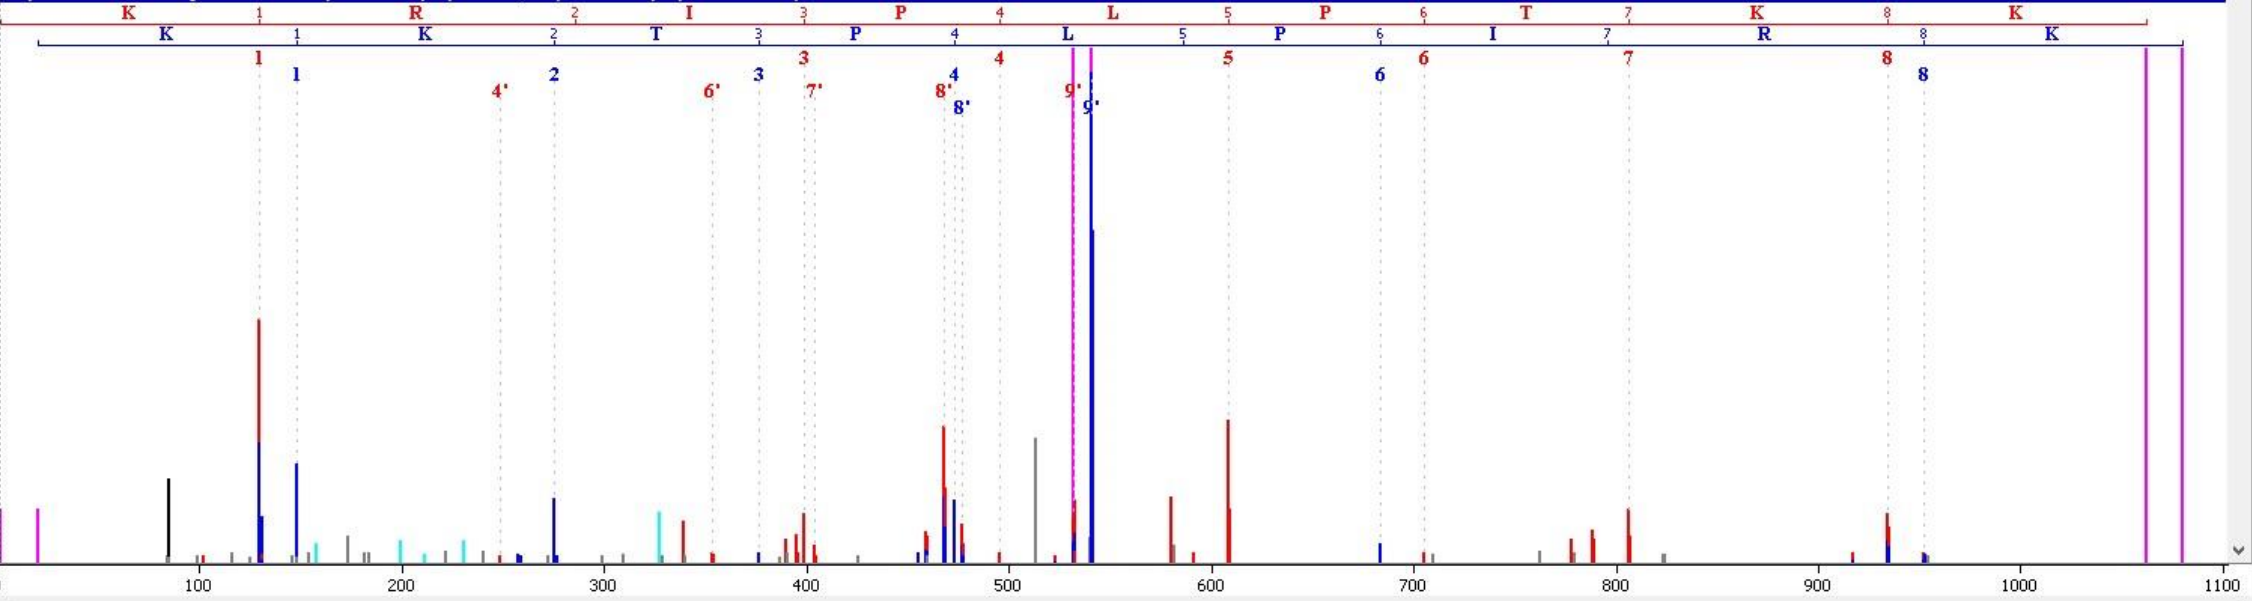

Fib spectrum 4819; spliced peptide sequence ATSQQKRLP

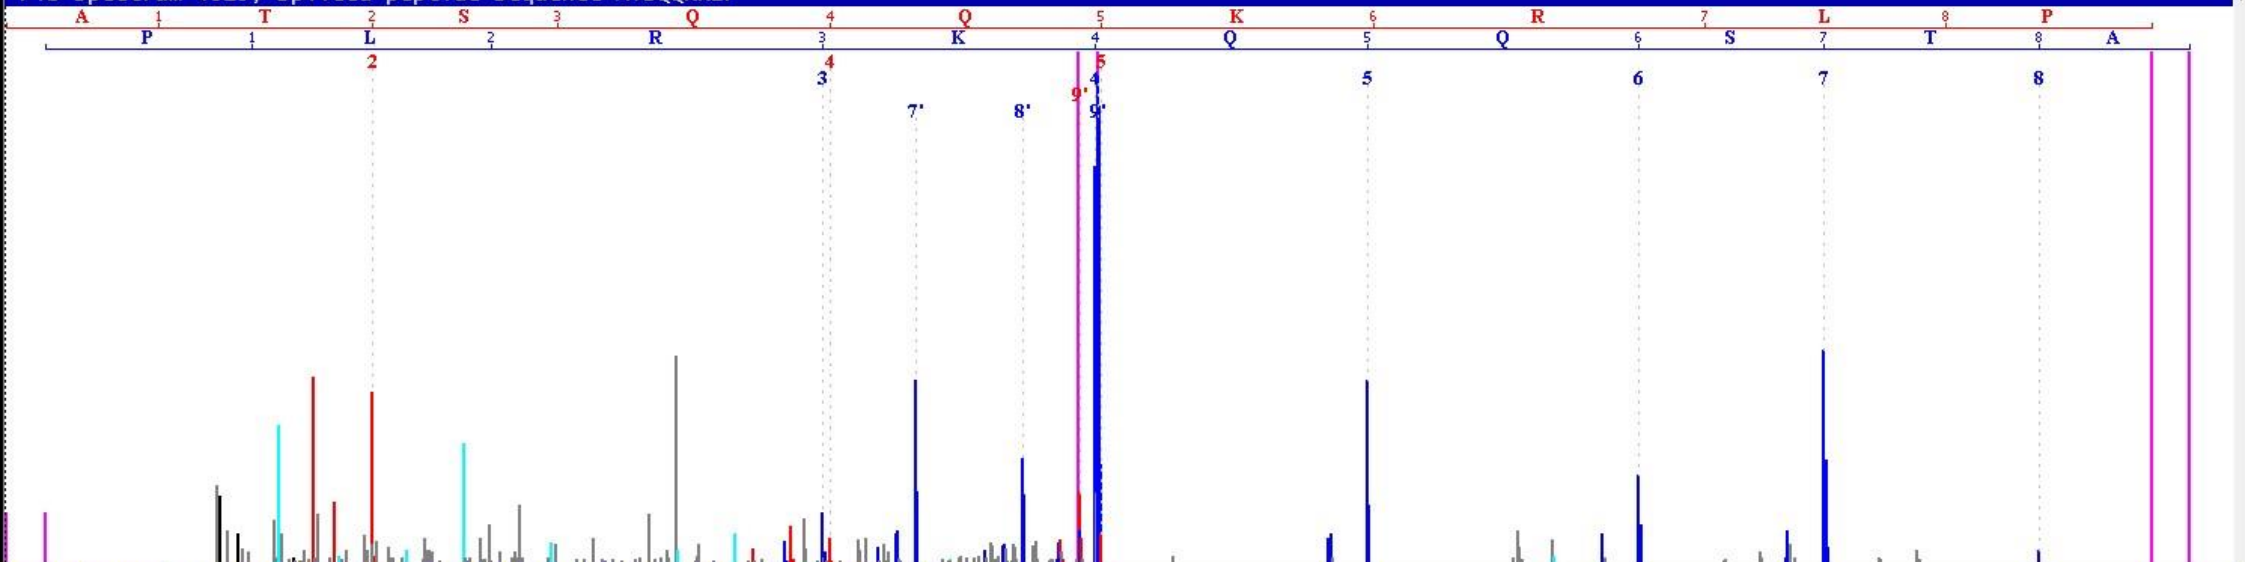

spectrum of synthetic spliced peptide; spliced peptide sequence ATSQQKRLP

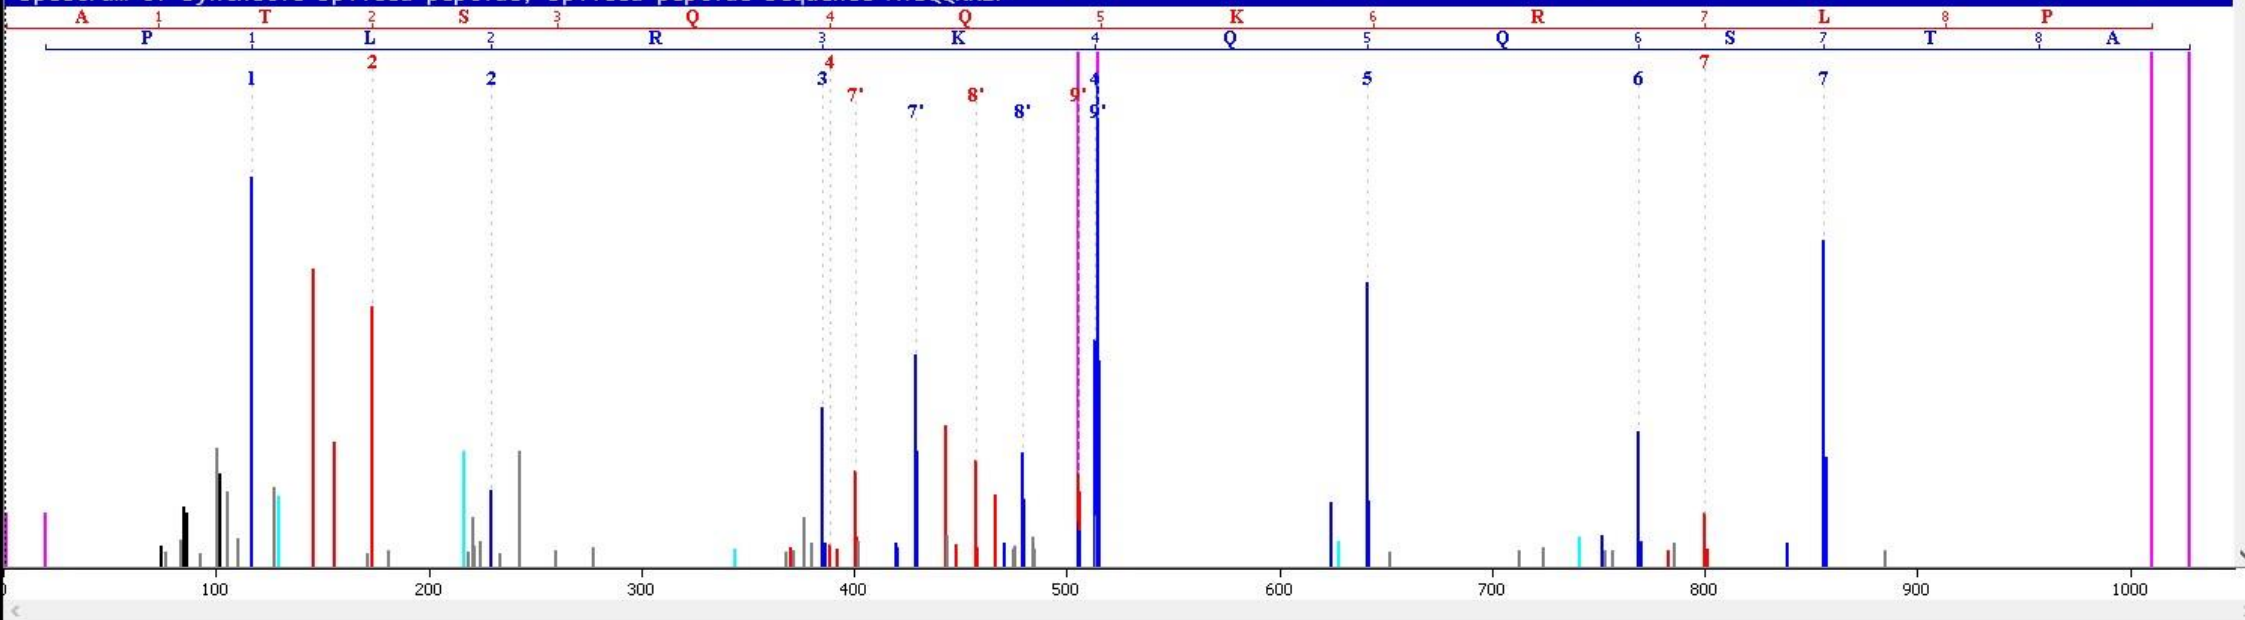

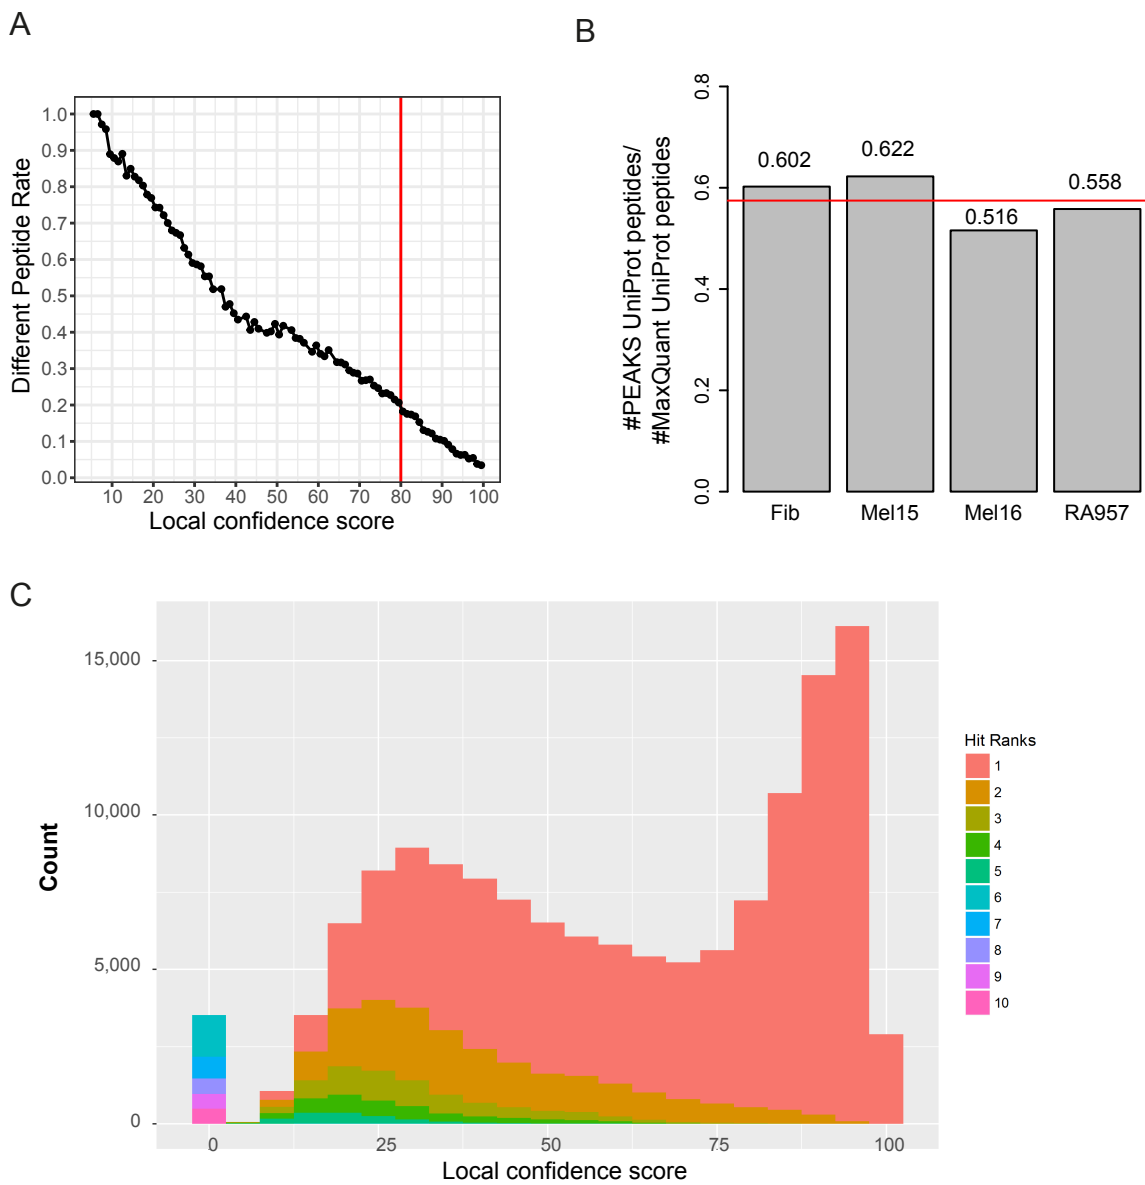

Supplemental Figure 6: A) Estimation of the error rate in PEAKS results by the fraction of Mel15 UniProt PSMs (y-axis) with a local confidence score higher than a threshold (x-axis), for which PEAKS assigned a different peptide compared to MaxQuant. Since the MaxQuant FDR is in agreement with the Comet FDR and Mascot FDR for the UniProt peptides (Figure 1 C), we assume that the error by MaxQuant is indeed about 1% and most of the sequence differences in this case are caused by erroneous PEAKS matches. PEAKS shows a FDR of about 20% at a local confidence score of 80 (red line). B) Fraction of UniProt HLA peptides identified by PEAKS at a local confidence score of 80 compared to MaxQuant UniProt peptides at spectrum level of FDR 1% for the different samples. C) A histogram presenting for each PSM the local confidence scores of the ten best matches identified by PEAKS in Mel15 data as an example.

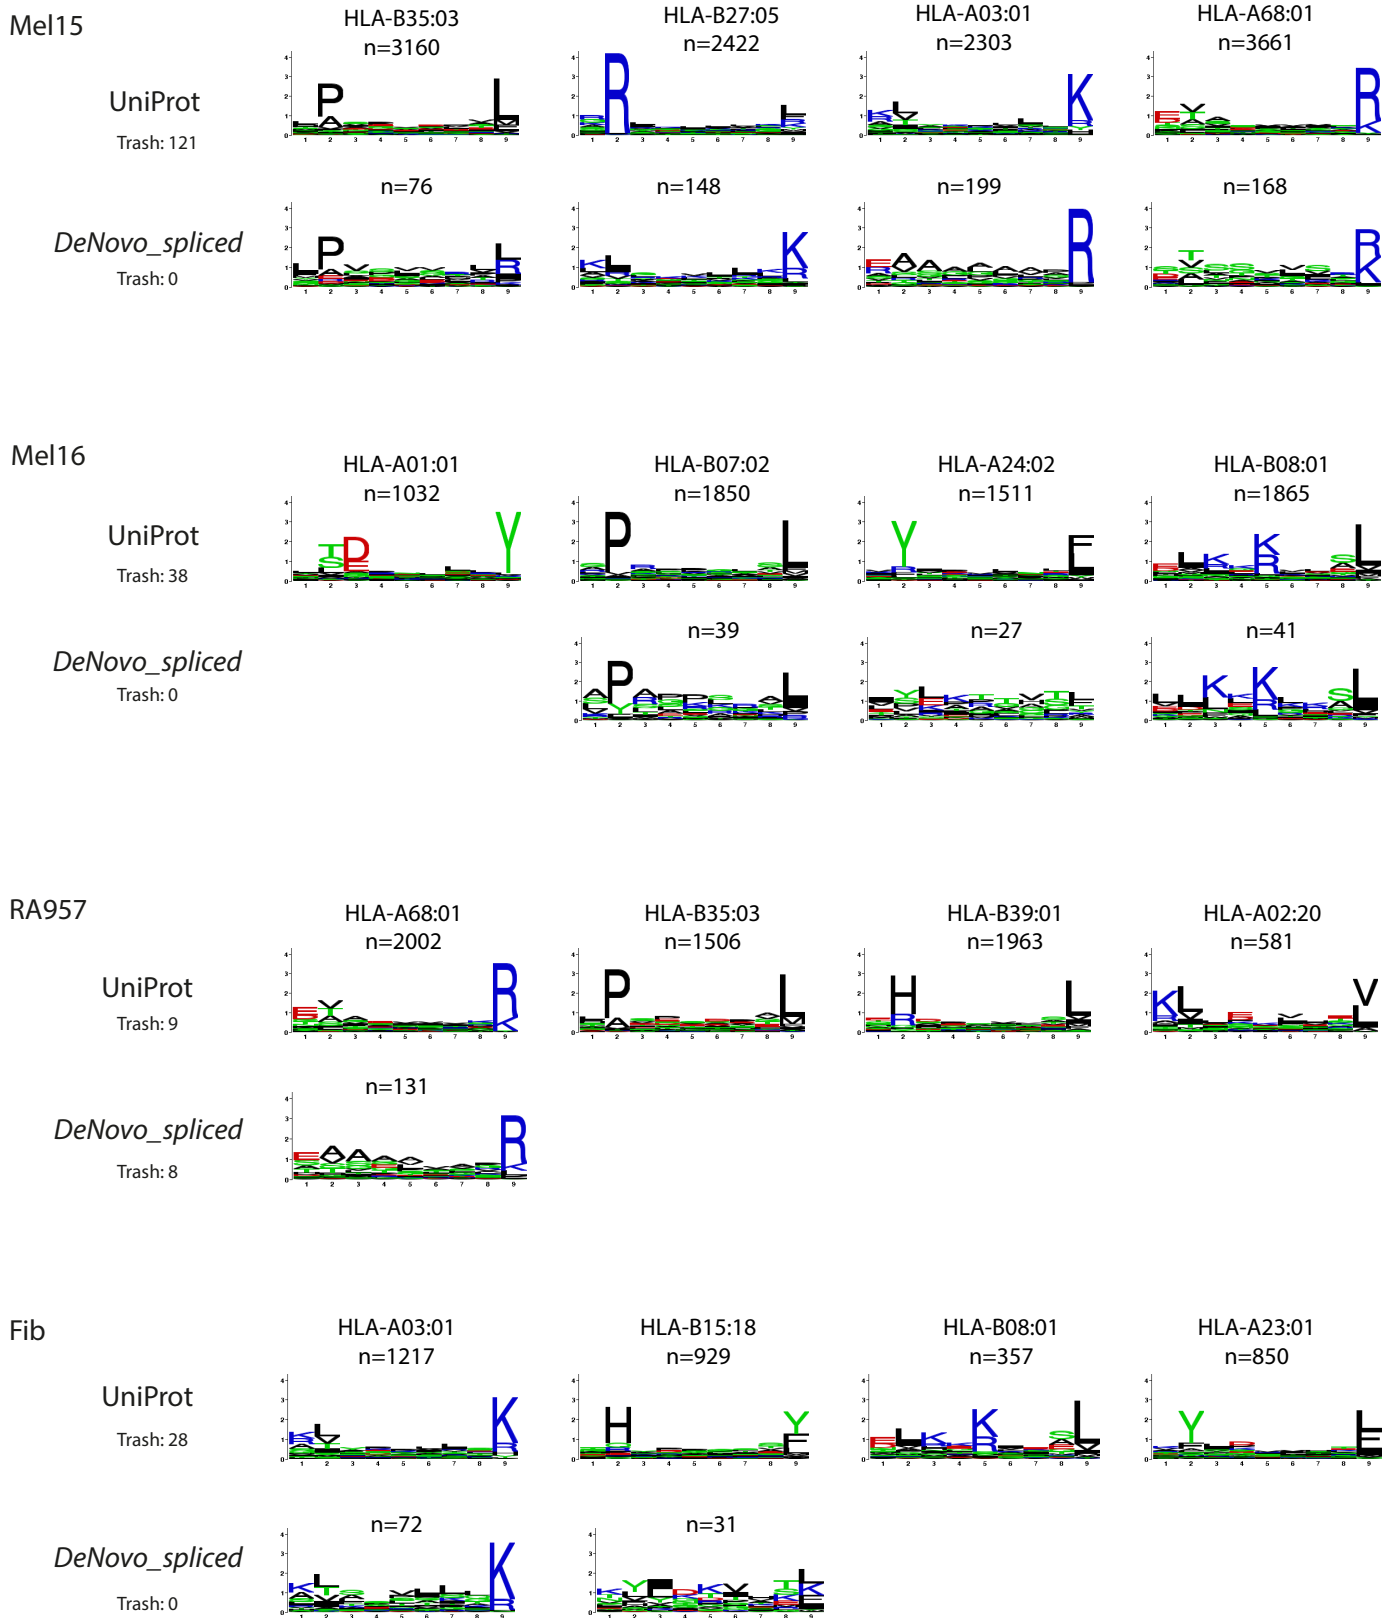

Supplemental Figure 7: Sequence motifs for the 9-mer *DeNovo\_spliced* peptides and UniProt peptides identified by MaxQuant in Mel15, Mel16, RA957 and Fib samples.

## A. PEAKS

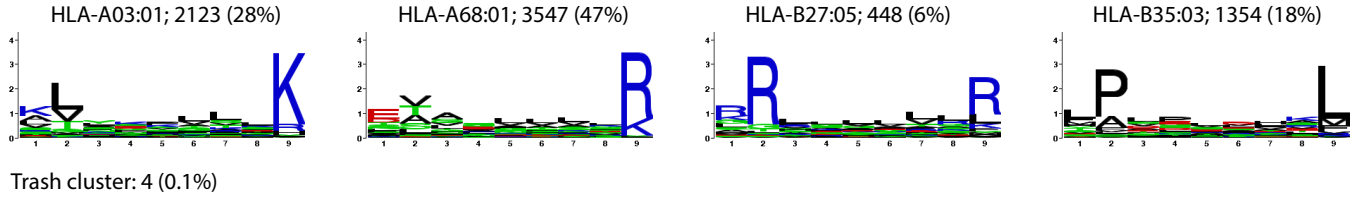

## B. MaxQuant

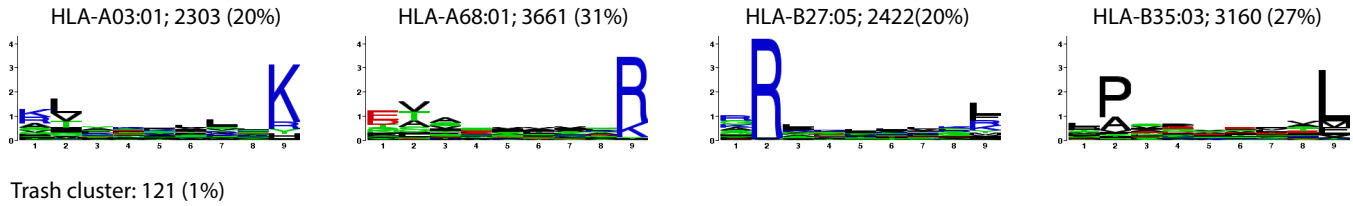

Supplemental Figure 8: A) Clustering analysis with MixMHCp of HLA-Ip identified as UniProt hits by PEAKS in Mel15 sample revealed three dominant clusters referring to HLA-B35:03, HLA-A68:01 and HLA-A03:01 and only 6% of the peptides clustered into the motif of the HLA-B27:05 allele. B) Similar clustering analysis of HLA-Ip identified as UniProt hits by MaxQuant from the same MS data revealed four dominant clusters and 20% of the peptides clustered into the HLA-B27:05 motif.
